# Supplementary material for: Organocatalytic stereoselective construction of polycyclic benzo[b]thiophenes from 2-aminobenzo[b]thiophenes and alkynyl-substituted enones
Source: Royal Society of Chemistry journal article supplement (doi:10.1039/d3nj02798h), 2023-01-01
Supplement: d3nj02798h1.pdf [file d3nj02798h1.pdf]

# Organocatalytic Stereoselective Construction of Polycyclic Benzo[*b*]thiophenes from 2-Aminobenzo[*b*]thiophenes and Alkynyl- substituted Enones

Cheng Niu, Yao Zheng, and Da-Ming Du\*

School of Chemistry and Chemical Engineering, Beijing Institute of Technology,  
Beijing 100081, People's Republic of China

E-mail: [dudm@bit.edu.cn](mailto:dudm@bit.edu.cn)

## Supporting Information

### Content

|                                                                                    |      |
|------------------------------------------------------------------------------------|------|
| 1. General information and starting materials .....                                | S1   |
| 2. Enantioselective synthesis and characterization of compounds <b>3</b> .....     | S1   |
| 3. Synthetic procedure and the characterization data of compound <b>4</b> .....    | S11  |
| 4. Crystal data and structure refinement.....                                      | S122 |
| 5. Reference.....                                                                  | S14  |
| 6. Copies of <sup>1</sup> H and <sup>13</sup> C NMR spectra of new compounds ..... | S15  |
| 7. Copies of HPLC chromatograms of new products.....                               | S53  |

## 1. General information and starting materials

**General information.** Commercially available reagents were used without further purification. Some benzo thiophene-2-carboxylic acid were purchased from Shanghai Haohong Scientific Co., Ltd. A Column chromatography was performed with silica gel (200-300 mesh). Melting points were determined with an XT-4 melting-point apparatus and are uncorrected.  $^1\text{H}$  NMR spectra were measured with Bruker Ascend 400 MHz (or 700 MHz) spectrometer in  $\text{CDCl}_3$ , chemical shifts were reported in  $\delta$  (ppm) units relative to tetramethylsilane (TMS) as the internal standard.  $^{13}\text{C}$  NMR spectra were measured at 100 MHz (or 176 MHz) with a Bruker Ascend 400 MHz (or 700 MHz) spectrometer, chemical shifts were reported in  $\delta$  (ppm) relative to tetramethylsilane and referenced to the solvent peak ( $\text{CDCl}_3$  at 77.0 ppm).  $^{19}\text{F}$  NMR spectra were measured at 376 MHz with a Bruker Ascend 400 MHz spectrometer. High resolution mass spectra were measured with an Agilent 6520 Accurate-Mass-Q-TOF MS system equipped with an electrospray ionization (ESI) source. Enantiomeric excesses were determined by chiral HPLC analysis using an Agilent 1200 LC instrument with a Daicel Chiralpak AD-H column. Optical rotations were measured with a Krüss P8000 polarimeter at the indicated concentration with the units of grams per 100 mL.

**Starting materials.** Substrate **1** were prepared according to the literature [1]. Substrate **2** were prepared according to the literature [2]. The organocatalysts were prepared according to the literature [3].

## 2. Enantioselective synthesis and characterization of compounds **3**

sulfonamide **1** (0.1 mmol), 2-alkynyl cycloenone **2** (0.12 mmol), and catalyst **C2** (3.0 mg, 0.005 mmol) were dissolved in toluene (1.0 mL), and the mixture was stirred at room temperature for about 72 h (monitored by TLC). After completion of the reaction, the residue was purified by flash column chromatography on silica gel (petroleum ether/ethyl acetate = 8/1 to 6:1) to afford the pure products **3**. Racemates were prepared following a similar procedure using following **C10** as catalyst (5 mol%).

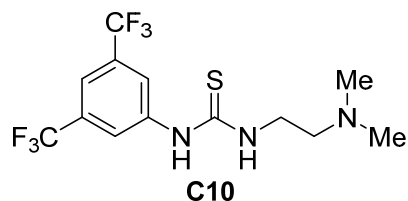

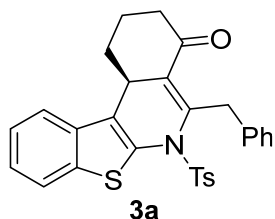

**(S)-5-Benzyl-6-tosyl-2,3,6,11c-tetrahydrobenzo[4,5]thieno[2,3-c]isoquinolin-4(1H)-one**

**(3a).** White solid (44.5 mg, 89% yield), m.p. 179 – 180 °C. HPLC (Daicel Chiralpak AD-H, *n*-hexane/2-propanol = 70/30, flow rate 1.0 mL/min, detection at 254 nm):  $t_R$  = 14.5 (minor),  $t_R$  = 23.8 min (major); 96% ee.  $[\alpha]_D^{25} = -126.5^\circ$  ( $c = 1.09$ ,  $\text{CH}_2\text{Cl}_2$ ).  $^1\text{H}$  NMR (400 MHz,  $\text{CDCl}_3$ ):  $\delta$  7.74 – 7.72 (m, 1H, ArH), 7.52 (d,  $J = 8.0$  Hz, 2H, ArH), 7.46 (d,  $J = 7.6$  Hz, 2H, ArH), 7.42 – 7.40 (m, 1H, ArH), 7.33 – 7.29 (m, 2H, ArH), 7.23 (d,  $J = 8.0$  Hz, 4H, ArH), 7.16 (t,  $J = 7.4$  Hz, 1H, ArH), 4.52 (d,  $J = 14.8$  Hz, 1H,  $\text{CH}_2$ ), 4.37 (d,  $J = 14.4$  Hz, 1H,  $\text{CH}_2$ ), 3.49 (dd,  $J_1 = 12.0$  Hz,  $J_2 = 4.8$  Hz, 1H, CH), 2.58 (dt,  $J_1 = 15.6$  Hz,  $J_2 = 5.4$  Hz, 1H,  $\text{CH}_2$ ), 2.39 (s, 3H,  $\text{CH}_3$ ), 2.30 – 2.22 (m, 1H,  $\text{CH}_2$ ), 2.12 – 2.05 (m, 1H,  $\text{CH}_2$ ), 1.85 – 1.67 (m, 2H,  $\text{CH}_2$ ), 0.28 – 0.18 (m, 1H,  $\text{CH}_2$ ) ppm.  $^{13}\text{C}$  NMR (100 MHz,  $\text{CDCl}_3$ ):  $\delta$  201.5, 145.0, 140.6, 138.4, 138.1, 137.0, 135.1, 132.1, 129.33, 129.27, 128.5, 128.2, 126.3, 125.4, 124.7, 124.2, 122.2, 120.5, 42.4, 38.1, 36.1, 30.5, 23.1, 21.6 ppm. HRMS (ESI):  $m/z$  calcd. for  $\text{C}_{29}\text{H}_{26}\text{NO}_3\text{S}_2$   $[\text{M} + \text{H}]^+$  500.1349, found 500.1353.

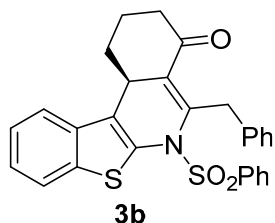

**(S)-5-benzyl-6-(phenylsulfonyl)-2,3,6,11c-tetrahydrobenzo[4,5]thieno[2,3-c]isoquinolin-**

**4(1H)-one (3b).** White solid (39.8 mg, 82% yield), m.p. 187–189 °C. HPLC (Daicel Chiralpak AD-H, *n*-hexane/2-propanol = 70/30, flow rate 1.0 mL/min, detection at 254 nm):  $t_R$  = 13.3 (minor),  $t_R$  = 18.3 min (major); 95% ee.  $[\alpha]_D^{25} = -105.9^\circ$  ( $c = 1.52$ ,  $\text{CH}_2\text{Cl}_2$ ).  $^1\text{H}$  NMR (700 MHz,  $\text{CDCl}_3$ ):  $\delta$  7.73 (d,  $J = 8.4$  Hz, 1H, ArH), 7.64 (d,  $J = 7.7$  Hz, 2H, ArH), 7.59 (t,  $J = 7.4$  Hz, 1H, ArH), 7.47 – 7.43 (m, 4H, ArH), 7.40 (d,  $J = 7.7$  Hz, 1H, ArH), 7.31 – 7.28 (m, 2H, ArH), 7.24 (t,  $J = 7.0$  Hz, 2H, ArH), 7.16 (t,  $J = 7.4$  Hz, 1H, ArH), 4.52 (d,  $J = 14.4$  Hz, 1H,  $\text{CH}_2$ ), 4.37 (d,  $J = 14.7$  Hz, 1H,  $\text{CH}_2$ ), 3.46 (dd,  $J_1 = 11.9$  Hz,  $J_2 = 4.9$  Hz, 1H, CH), 2.57 (dt, 1H,  $J_1 = 15.4$  Hz,  $J_2 = 5.6$  Hz, 1H,  $\text{CH}_2$ ), 2.26 – 2.21 (m, 1H,  $\text{CH}_2$ ), 2.07 – 2.03 (m, 1H,  $\text{CH}_2$ ), 1.81 – 1.74 (m, 1H,  $\text{CH}_2$ ), 1.72 – 1.67 (m, 1H,  $\text{CH}_2$ ), 0.16 – 0.10 (m, 1H,  $\text{CH}_2$ ) ppm.  $^{13}\text{C}$  NMR (176 MHz,  $\text{CDCl}_3$ ):  $\delta$  201.4, 140.3, 138.3, 138.0, 136.8, 135.1, 134.8, 133.9, 132.3, 129.3, 128.8, 128.4, 128.2, 126.3, 125.5, 124.8, 124.3, 122.2, 120.5, 42.5, 38.2, 36.1, 30.6, 23.1 ppm. HRMS

(ESI):  $m/z$  calcd. for  $C_{28}H_{23}NNaO_3S_2$  [ $M + Na$ ] $^+$  508.1012, found 508.1017.

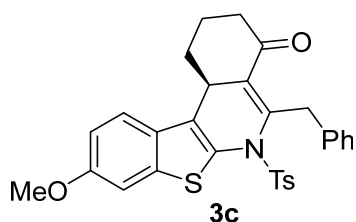

**(S)-5-benzyl-9-methoxy-6-tosyl-2,3,6,11c-tetrahydrobenzo[4,5]thieno[2,3-*c*]isoquinolin-4(1*H*)-one (3c).** White solid (36.0 mg, 68% yield), m.p. 165 – 166 °C. HPLC (Daicel Chiralpak AD-H, *n*-hexane/2-propanol = 70/30, flow rate 1.0 mL/min, detection at 254 nm):  $t_R$  = 31.0 (major),  $t_R$  = 39.7 min (minor); 93% ee.  $[\alpha]_D^{25} = -114.5^\circ$  ( $c = 1.34$ ,  $CH_2Cl_2$ ).  $^1H$  NMR (700 MHz,  $CDCl_3$ ):  $\delta$  7.51 (d,  $J = 7.7$  Hz, 2H, ArH), 7.46 (d,  $J = 7.7$  Hz, 2H, ArH), 7.28 (d,  $J = 9.1$  Hz, 1H, ArH), 7.25 – 7.22 (m, 4H, ArH), 7.19 (d,  $J = 2.1$  Hz, 1H, ArH), 7.16 (t,  $J = 7.4$  Hz, 1H, ArH), 6.90 (dd,  $J_1 = 8.4$  Hz,  $J_2 = 2.1$  Hz, 1H, ArH), 4.52 (d,  $J = 14.7$  Hz, 1H,  $CH_2$ ), 4.35 (d,  $J = 14.0$  Hz, 1H,  $CH_2$ ), 3.84 (s, 3H,  $CH_3$ ), 3.41 (dd,  $J_1 = 11.9$  Hz,  $J_2 = 4.9$  Hz, 1H, CH), 2.56 (dt, 1H,  $J_1 = 15.4$  Hz,  $J_2 = 5.3$  Hz, 1H,  $CH_2$ ), 2.38 (s, 3H,  $CH_3$ ), 2.26 – 2.22 (m, 1H,  $CH_2$ ), 2.07 – 2.03 (m, 1H,  $CH_2$ ), 1.79 – 1.73 (m, 1H,  $CH_2$ ), 1.71 – 1.67 (m, 1H,  $CH_2$ ), 0.24 – 0.18 (m, 1H,  $CH_2$ ) ppm.  $^{13}C$  NMR (176 MHz,  $CDCl_3$ ):  $\delta$  201.5, 157.6, 145.0, 140.7, 139.6, 138.5, 134.2, 132.1, 131.9, 129.3, 128.9, 128.5, 128.2, 126.3, 125.3, 121.4, 114.0, 104.8, 55.6, 42.4, 38.2, 36.2, 30.4, 23.0, 21.6 ppm. HRMS (ESI):  $m/z$  calcd. for  $C_{30}H_{28}NO_4S_2$  [ $M + H$ ] $^+$  530.1454, found 530.1464.

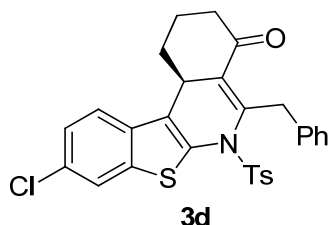

**(S)-5-benzyl-9-chloro-6-tosyl-2,3,6,11c-tetrahydrobenzo[4,5]thieno[2,3-*c*]isoquinolin-4(1*H*)-one (3d).** White solid (39.4 mg, 74% yield), m.p. 176 – 178 °C. HPLC (Daicel Chiralpak AD-H, *n*-hexane/2-propanol = 70/30, flow rate 1.0 mL/min, detection at 254 nm):  $t_R$  = 17.9 (minor),  $t_R$  = 27.8 min (major); 97% ee.  $[\alpha]_D^{25} = -101.9^\circ$  ( $c = 0.80$ ,  $CH_2Cl_2$ ).  $^1H$  NMR (700 MHz,  $CDCl_3$ ):  $\delta$  7.70 (d,  $J = 1.4$  Hz, 1H, ArH), 7.51 (d,  $J = 7.7$  Hz, 2H, ArH), 7.46 (d,  $J = 7.7$  Hz, 2H, ArH), 7.30 (d,  $J = 8.4$  Hz, 1H, ArH), 7.26 – 7.24 (m, 5H, ArH), 7.17 (t,  $J = 7.4$  Hz, 1H, ArH), 4.51 (d,  $J = 14.0$  Hz, 1H,  $CH_2$ ), 4.35 (d,  $J = 14.0$  Hz, 1H,  $CH_2$ ), 3.44 (dd,  $J_1 = 12.3$  Hz,  $J_2 = 4.6$  Hz, 1H, CH), 2.57 (dt, 1H,  $J_1 = 15.8$  Hz,  $J_2 = 5.3$  Hz, 1H,  $CH_2$ ), 2.40 (s, 3H,  $CH_3$ ), 2.28 – 2.23 (m, 1H,  $CH_2$ ), 2.05 – 2.02 (m, 1H,  $CH_2$ ), 1.81 – 1.75 (m, 1H,  $CH_2$ ), 1.73 – 1.69 (m, 1H,  $CH_2$ ), 0.25 – 0.16 (m, 1H,  $CH_2$ ) ppm.  $^{13}C$  NMR (176 MHz,  $CDCl_3$ ):  $\delta$  201.3, 145.2, 140.6,

139.0, 138.3, 137.4, 133.5, 132.0, 131.8, 130.8, 129.4, 129.3, 128.5, 128.3, 126.4, 125.10, 125.06, 121.8, 121.5, 42.4, 38.0, 36.1, 30.5, 23.0, 21.6 ppm. HRMS (ESI):  $m/z$  calcd. for  $C_{29}H_{25}^{35}ClNO_3S_2 [M + H]^+$  534.0959; found 534.0903; calcd. for  $C_{29}H_{25}^{37}ClNO_3S_2 [M + H]^+$  536.0929, found 536.0924.

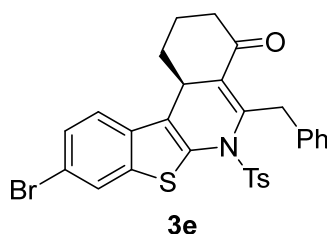

**(S)-5-benzyl-9-bromo-6-tosyl-2,3,6,11c-tetrahydrobenzo[4,5]thieno[2,3-c]isoquinolin-4(1H)-one (3e).** White solid (42.2 mg, 73% yield), m.p. 165 – 167 °C. HPLC (Daicel Chiralpak AD-H, *n*-hexane/2-propanol = 65/35, flow rate 1.0 mL/min, detection at 254 nm):  $t_R$  = 19.4 (minor),  $t_R$  = 27.0 min (major); 93% ee.  $[\alpha]_D^{25} = -130.7^\circ$  ( $c = 1.07$ ,  $CH_2Cl_2$ ).  $^1H$  NMR (700 MHz,  $CDCl_3$ ):  $\delta$  7.84 (s, 1H, ArH), 7.50 (d,  $J = 7.7$  Hz, 2H, ArH), 7.46 (d,  $J = 7.7$  Hz, 2H, ArH), 7.37 (d,  $J = 8.4$  Hz, 1H, ArH), 7.26 – 7.23 (m, 5H, ArH), 7.17 (t,  $J = 7.4$  Hz, 1H, ArH), 4.51 (d,  $J = 14.7$  Hz, 1H,  $CH_2$ ), 4.35 (d,  $J = 14.7$  Hz, 1H,  $CH_2$ ), 3.44 (dd,  $J_1 = 11.9$  Hz,  $J_2 = 4.9$  Hz, 1H, CH), 2.57 (dt, 1H,  $J_1 = 15.4$  Hz,  $J_2 = 5.6$  Hz, 1H,  $CH_2$ ), 2.39 (s, 3H,  $CH_3$ ), 2.28 – 2.23 (m, 1H,  $CH_2$ ), 2.04 – 2.00 (m, 1H,  $CH_2$ ), 1.81 – 1.75 (m, 1H,  $CH_2$ ), 1.73 – 1.68 (m, 1H,  $CH_2$ ), 0.24 – 0.18 (m, 1H,  $CH_2$ ) ppm.  $^{13}C$  NMR (176 MHz,  $CDCl_3$ ):  $\delta$  201.3, 145.2, 140.6, 139.4, 138.3, 137.4, 133.8, 131.9, 131.8, 129.4, 129.3, 128.4, 128.3, 127.7, 126.4, 125.1, 124.7, 121.7, 118.4, 42.4, 37.9, 36.1, 30.5, 23.0, 21.6 ppm. HRMS (ESI):  $m/z$  calcd. for  $C_{29}H_{25}^{79}BrNO_3S_2 [M + H]^+$  578.0454, found 578.0457; calcd. for  $C_{29}H_{25}^{81}BrNO_3S_2 [M + H]^+$  580.0434, found 580.0438.

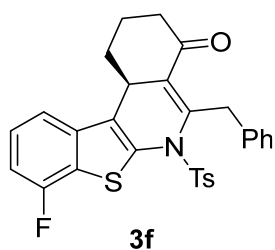

**(S)-5-benzyl-6-(methylsulfonyl)-2,3,6,11c-tetrahydrobenzo[4,5]thieno[2,3-c]isoquinolin-4(1H)-one (3f).** White solid (41.9 mg, 81% yield), m.p. 188 – 189 °C. HPLC (Daicel Chiralpak AD-H, *n*-hexane/2-propanol = 70/30, flow rate 1.0 mL/min, detection at 254 nm):  $t_R$  = 12.0 (minor),  $t_R$  = 25.5 min (major); 95% ee.  $[\alpha]_D^{25} = -106.7^\circ$  ( $c = 0.55$ ,  $CH_2Cl_2$ ).  $^1H$  NMR (700 MHz,  $CDCl_3$ ):  $\delta$  7.53 (d,  $J = 8.4$  Hz, 2H, ArH), 7.46 (d,  $J = 7.7$  Hz, 2H, ArH), 7.26 – 7.24 (m, 5H, ArH), 7.20 – 7.17 (m, 2H, ArH), 7.13 (t,  $J = 8.8$  Hz, 2H, ArH), 4.51 (d,  $J = 14.7$  Hz, 1H,  $CH_2$ ), 4.37 (d,  $J = 14.7$  Hz, 1H,  $CH_2$ ), 3.47 (dd,  $J_1 = 11.9$  Hz,  $J_2 = 4.9$  Hz, 1H, CH), 2.58 (dt,

1H,  $J_1 = 15.8$  Hz,  $J_2 = 5.3$  Hz, 1H, CH<sub>2</sub>), 2.40 (s, 3H, CH<sub>3</sub>), 2.29 – 2.24 (m, 1H, CH<sub>2</sub>), 2.09 – 2.05 (m, 1H, CH<sub>2</sub>), 1.82 – 1.76 (m, 1H, CH<sub>2</sub>), 1.74 – 1.69 (m, 1H, CH<sub>2</sub>), 0.28 – 0.23 (m, 1H, CH<sub>2</sub>) ppm. <sup>13</sup>C NMR (176 MHz, CDCl<sub>3</sub>): δ 201.3, 157.1 (d,  $^1J_{C-F} = 247.8$  Hz), 145.2, 140.7, 138.3, 138.19, 138.16, 132.0, 131.9, 129.4 (d,  $^2J_{C-F} = 23.6$  Hz), 128.5, 128.3, 126.4, 125.8 (d,  $^4J_{C-F} = 1.8$  Hz), 125.7 (d,  $^3J_{C-F} = 7.0$  Hz), 124.9 (d,  $^3J_{C-F} = 18.1$  Hz), 116.44, 116.42, 110.1 (d,  $^2J_{C-F} = 18.5$  Hz), 42.4, 38.2, 36.1, 30.5, 23.0, 21.6 ppm. <sup>19</sup>F NMR (376 MHz, CDCl<sub>3</sub>): δ –114.5 ppm. HRMS (ESI):  $m/z$  calcd. for C<sub>29</sub>H<sub>25</sub>FNO<sub>3</sub>S<sub>2</sub> [M + H]<sup>+</sup> 518.1254, found 518.1257.

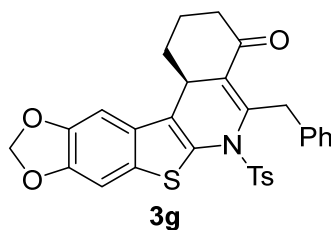

**(S)-5-benzyl-6-tosyl-2,3,6,12c-tetrahydro-**

**[1,3]dioxolo[4'',5'':4',5']benzo[1',2':4,5]thieno[2,3-c]isoquinolin-4(1H)-one (3g).** White solid (47.8 mg, 88% yield), m.p. 173 – 175 °C. HPLC (Daicel Chiralpak AD-H, *n*-hexane/2-propanol = 70/30, flow rate 1.0 mL/min, detection at 254 nm):  $t_R = 24.4$  (major),  $t_R = 31.4$  min (minor); 93% ee.  $[\alpha]_D^{25} = -148.8^\circ$  ( $c = 1.39$ , CH<sub>2</sub>Cl<sub>2</sub>). <sup>1</sup>H NMR (400 MHz, CDCl<sub>3</sub>): δ 7.51 – 7.46 (m, 4H, ArH), 7.23 (d,  $J = 7.6$  Hz, 4H, ArH), 7.15 (t,  $J = 7.2$  Hz, 1H, ArH), 7.10 (s, 1H, ArH), 6.77 (s, 1H, ArH), 5.96 (d,  $J = 0.8$  Hz, 2H, CH<sub>2</sub>), 4.51 (d,  $J = 14.4$  Hz, 1H, CH<sub>2</sub>), 4.34 (d,  $J = 14.4$  Hz, 1H, CH<sub>2</sub>), 3.37 (dd,  $J_1 = 12.0$  Hz,  $J_2 = 4.8$  Hz, 1H, CH), 2.55 (dt,  $J_1 = 15.6$  Hz,  $J_2 = 5.2$  Hz, 1H, CH<sub>2</sub>), 2.28 – 2.20 (m, 1H, CH<sub>2</sub>), 2.01 – 1.95 (m, 1H, CH<sub>2</sub>), 1.81 – 1.64 (m, 2H, CH<sub>2</sub>), 0.18 – 0.08 (m, 1H, CH<sub>2</sub>) ppm. <sup>13</sup>C NMR (176 MHz, CDCl<sub>3</sub>): δ 201.5, 146.6, 146.5, 145.0, 140.5, 138.4, 134.9, 132.0, 131.4, 129.27, 129.25, 128.5, 128.2, 126.3, 125.4, 101.7, 101.3, 99.8, 42.4, 38.1, 36.1, 30.3, 23.0, 21.6 ppm. HRMS (ESI):  $m/z$  calcd. for C<sub>30</sub>H<sub>25</sub>KNO<sub>5</sub>S<sub>2</sub> [M + K]<sup>+</sup> 582.0806, found 582.0806.

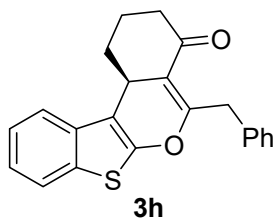

**(S)-5-benzyl-1,2,3,11c-tetrahydro-4H-benzo[4,5]thieno[2,3-c]isochromen-4-one (3h).** White solid (30.8 mg, 89% yield), m.p. 107 – 108 °C. HPLC (Daicel Chiralpak AD-H, *n*-hexane/2-propanol = 70/30, flow rate 1.0 mL/min, detection at 254 nm):  $t_R = 4.9$  (major),  $t_R = 5.5$  min (minor); 96% ee.  $[\alpha]_D^{25} = +19.6^\circ$  ( $c = 0.76$ , CH<sub>2</sub>Cl<sub>2</sub>). <sup>1</sup>H NMR (400 MHz, CDCl<sub>3</sub>): δ 7.66 (d,  $J = 8.0$  Hz, 1H, ArH), 7.55 (d,  $J = 7.6$  Hz, 1H, ArH), 7.39 (d,  $J = 7.2$  Hz, 2H, ArH),

7.35 – 7.28 (m, 3H, ArH), 7.27 – 7.21 (m, 2H, ArH), 4.02 – 3.87 (m, 3H, CH + CH<sub>2</sub>), 2.75 – 2.61 (m, 2H, CH<sub>2</sub>), 2.53 – 2.45 (m, 1H, CH<sub>2</sub>), 2.09 – 2.02 (m, 2H, CH<sub>2</sub>), 1.89 – 1.79 (m, 1H, CH<sub>2</sub>) ppm. <sup>13</sup>C NMR (100 MHz, CDCl<sub>3</sub>): δ 201.8, 155.4, 151.1, 137.1, 136.2, 132.0, 129.0, 128.4, 126.6, 124.6, 123.6, 122.5, 121.0, 113.3, 111.0, 41.3, 36.6, 34.5, 30.8, 22.1 ppm. HRMS (ESI): *m/z* calcd. for C<sub>22</sub>H<sub>19</sub>O<sub>2</sub>S [M + H]<sup>+</sup> 347.1100, found 347.1100.

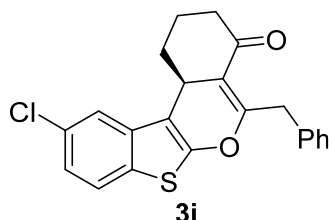

**(S)-5-benzyl-10-chloro-1,2,3,11c-tetrahydro-4H-benzo[4,5]thieno[2,3-c]isochromen-4-one (3i).** White solid (29.7 mg, 78% yield), m.p. 108 – 110 °C. HPLC (Daicel Chiralpak AD-H, *n*-hexane/2-propanol = 70/30, flow rate 1.0 mL/min, detection at 254 nm): *t<sub>R</sub>* = 5.2 (major), *t<sub>R</sub>* = 6.3 min (minor); 90% ee. [α]<sub>D</sub><sup>25</sup> = +17.4 ° (*c* = 0.70, CH<sub>2</sub>Cl<sub>2</sub>). <sup>1</sup>H NMR (400 MHz, CDCl<sub>3</sub>): δ 7.56 (d, *J* = 8.8 Hz, 1H, ArH), 7.51 (d, *J* = 2.0 Hz, 1H, ArH), 7.39 (d, *J* = 7.2 Hz, 2H, ArH), 7.31 (t, *J* = 7.4 Hz, 2H, ArH), 7.23 – 7.20 (m, 2H, ArH), 3.98 – 3.84 (m, 3H, CH + CH<sub>2</sub>), 2.70 – 2.62 (m, 2H, CH<sub>2</sub>), 2.53 – 2.45 (m, 1H, CH<sub>2</sub>), 2.10 – 2.03 (m, 2H, CH<sub>2</sub>), 1.89 – 1.79 (m, 1H, CH<sub>2</sub>) ppm. <sup>13</sup>C NMR (176 MHz, CDCl<sub>3</sub>) δ 201.6, 155.2, 152.6, 137.4, 137.0, 131.0, 129.9, 129.0, 128.5, 126.7, 123.9, 123.6, 120.7, 113.3, 110.7, 41.3, 36.5, 34.4, 30.8, 22.1 ppm. HRMS (ESI): *m/z* calcd. for C<sub>22</sub>H<sub>18</sub>ClO<sub>2</sub>S [M + H]<sup>+</sup> 381.0711, found 381.0709.

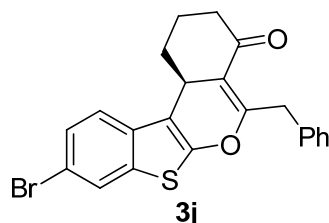

**(S)-5-benzyl-9-bromo-1,2,3,11c-tetrahydro-4H-benzo[4,5]thieno[2,3-c]isochromen-4-one (3j).** White solid (21.3 mg, 50% yield), m.p. 113 – 114 °C. HPLC (Daicel Chiralpak AD-H, *n*-hexane/2-propanol = 70/30, flow rate 1.0 mL/min, detection at 254 nm): *t<sub>R</sub>* = 6.9 (major), *t<sub>R</sub>* = 8.4 min (minor); 92% ee. [α]<sub>D</sub><sup>25</sup> = +22.0 ° (*c* = 0.87, CH<sub>2</sub>Cl<sub>2</sub>). <sup>1</sup>H NMR (400 MHz, CDCl<sub>3</sub>): δ 7.67 (d, *J* = 2.0 Hz, 1H, ArH), 7.51 (d, *J* = 8.4 Hz, 1H, ArH), 7.39 (d, *J* = 7.2 Hz, 2H, ArH), 7.35 (dd, *J*<sub>1</sub> = 8.4 Hz, *J*<sub>2</sub> = 2.0 Hz, 1H, ArH), 7.31 (t, *J* = 7.4 Hz, 2H, ArH), 7.24 – 7.21 (m, 1H, ArH), 3.98 – 3.86 (m, 3H, CH + CH<sub>2</sub>), 2.71 – 2.62 (m, 2H, CH<sub>2</sub>), 2.54 – 2.46 (m, 1H, CH<sub>2</sub>), 2.10 – 2.03 (m, 2H, CH<sub>2</sub>), 1.89 – 1.79 (m, 1H, CH<sub>2</sub>) ppm. <sup>13</sup>C NMR (176 MHz, CDCl<sub>3</sub>) δ 201.6, 155.2, 152.5, 137.9, 136.9, 130.5, 129.0, 128.5, 126.7, 126.6, 123.9, 123.7, 118.7, 113.3, 110.6, 41.3, 36.5, 34.4, 30.8, 22.1 ppm. HRMS (ESI): *m/z* calcd. for C<sub>22</sub>H<sub>18</sub><sup>79</sup>BrO<sub>2</sub>S [M + H]<sup>+</sup> 425.0205,

found 425.0200; calcd. for C<sub>22</sub>H<sub>18</sub><sup>81</sup>BrO<sub>2</sub>S [M + H]<sup>+</sup> 427.0185, found 427.0191.

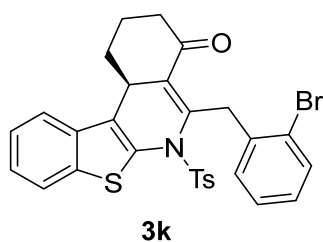

**(S)-5-(2-bromobenzyl)-6-tosyl-2,3,6,11c-tetrahydrobenzo[4,5]thieno[2,3-c]isoquinolin-4(1H)-one (3k).** White solid (53.8 mg, 93% yield), m.p. 112 – 113 °C. HPLC (Daicel Chiralpak AD-H, *n*-hexane/2-propanol = 85/15, flow rate 1.0 mL/min, detection at 254 nm): *t<sub>R</sub>* = 17.6 (minor), *t<sub>R</sub>* = 18.7 min (major); 93% ee. [α]<sub>D</sub><sup>25</sup> = +4.6 ° (*c* = 1.05, CH<sub>2</sub>Cl<sub>2</sub>). <sup>1</sup>H NMR (400 MHz, CDCl<sub>3</sub>): δ 7.80 – 7.77 (m, 1H, ArH), 7.53 – 7.49 (m, 4H, ArH), 7.37 – 7.31 (m, 2H, ArH), 7.20 – 7.15 (m, 4H, ArH), 7.06 – 7.01 (m, 1H, ArH), 4.64 (d, *J* = 16.8 Hz, 1H, CH<sub>2</sub>), 4.37 (d, *J* = 16.8 Hz, 1H, CH<sub>2</sub>), 3.33 (dd, *J*<sub>1</sub> = 11.8 Hz, *J*<sub>2</sub> = 5.0 Hz, 1H, CH), 2.52 (dt, *J*<sub>1</sub> = 15.6 Hz, *J*<sub>2</sub> = 5.0 Hz, 1H, CH<sub>2</sub>), 2.38 (s, 3H, CH<sub>3</sub>), 2.35 – 2.28 (m, 1H, CH<sub>2</sub>), 2.23 – 2.15 (m, 1H, CH<sub>2</sub>), 1.83 – 1.73 (m, 2H, CH<sub>2</sub>), 0.79 – 0.69 (m, 1H, CH<sub>2</sub>) ppm. <sup>13</sup>C NMR (176 MHz, CDCl<sub>3</sub>): δ 201.8, 145.0, 139.9, 138.2, 138.0, 136.9, 135.1, 134.6, 132.6, 131.7, 130.3, 129.3, 128.5, 127.7, 127.2, 126.0, 124.7, 124.2, 122.5, 121.2, 42.1, 38.6, 38.3, 30.4, 23.0, 21.6 ppm. HRMS (ESI): *m/z* calcd. for C<sub>29</sub>H<sub>25</sub><sup>79</sup>BrNO<sub>3</sub>S<sub>2</sub> [M + H]<sup>+</sup> 578.0454, found 578.0457; calcd. for C<sub>29</sub>H<sub>25</sub><sup>81</sup>BrNO<sub>3</sub>S<sub>2</sub> [M + H]<sup>+</sup> 580.0434, found 580.0438.

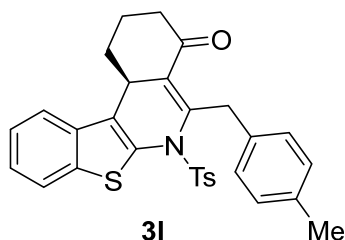

**(S)-5-(4-methylbenzyl)-6-tosyl-2,3,6,11c-tetrahydrobenzo[4,5]thieno[2,3-c]isoquinolin-4(1H)-one (3l).** White solid (33.4 mg, 65% yield), m.p. 193 – 194 °C. HPLC (Daicel Chiralpak AD-H, *n*-hexane/2-propanol = 70/30, flow rate 1.0 mL/min, detection at 254 nm): *t<sub>R</sub>* = 8.1 (major), *t<sub>R</sub>* = 12.4 min (minor); 88% ee. [α]<sub>D</sub><sup>25</sup> = –117.0 ° (*c* = 1.13, CH<sub>2</sub>Cl<sub>2</sub>). <sup>1</sup>H NMR (400 MHz, CDCl<sub>3</sub>): δ 7.75 – 7.72 (m, 1H, ArH), 7.52 (d, *J* = 8.4 Hz, 2H, ArH), 7.42 – 7.40 (m, 1H, ArH), 7.35 (d, *J* = 8.0 Hz, 2H, ArH), 7.32 – 7.29 (m, 2H, ArH), 7.23 (d, *J* = 8.0 Hz, 2H, ArH), 7.05 (d, *J* = 8.0 Hz, 2H, ArH), 4.48 (d, *J* = 14.4 Hz, 1H, CH<sub>2</sub>), 4.32 (d, *J* = 14.4 Hz, 1H, CH<sub>2</sub>), 3.49 (dd, *J*<sub>1</sub> = 11.8 Hz, *J*<sub>2</sub> = 5.0 Hz, 1H, CH), 2.57 (dt, *J*<sub>1</sub> = 15.6 Hz, *J*<sub>2</sub> = 5.4 Hz, 1H, CH<sub>2</sub>), 2.39 (s, 3H, CH<sub>3</sub>), 2.30 – 2.22 (m, 4H, CH<sub>2</sub> + CH<sub>3</sub>), 2.11 – 2.04 (m, 1H, CH<sub>2</sub>), 1.85 – 1.67 (m, 2H, CH<sub>2</sub>), 0.27 – 0.15 (m, 1H, CH<sub>2</sub>) ppm. <sup>13</sup>C NMR (100 MHz, CDCl<sub>3</sub>): δ 201.4, 145.0, 140.9, 138.1, 137.1, 135.8, 135.4, 135.2, 132.1, 131.8, 129.3, 129.1, 129.0, 128.5, 125.4, 124.7, 124.2,



122.2, 120.5, 42.4, 38.1, 35.7, 30.5, 23.0, 21.6, 21.0 ppm. HRMS (ESI):  $m/z$  calcd. for  $C_{30}H_{28}NO_3S_2$   $[M + H]^+$  514.1505, found 514.1506.

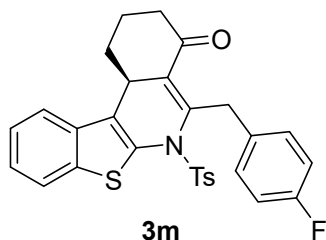

**(S)-5-(4-fluorobenzyl)-6-tosyl-2,3,6,11c-tetrahydrobenzo[4,5]thieno[2,3-c]isoquinolin-4(1H)-one (3m).** White solid (38.3 mg, 74% yield), m.p. 173 – 174 °C. HPLC (Daicel Chiralpak AD-H, *n*-hexane/2-propanol = 70/30, flow rate 1.0 mL/min, detection at 254 nm):  $t_R$  = 9.0 (major),  $t_R$  = 12.7 min (minor); 94% ee.  $[\alpha]_D^{25} = -79.9^\circ$  ( $c = 2.34$ ,  $CH_2Cl_2$ ). ( $c = 2.70$ ,  $CH_2Cl_2$ ).  $^1H$  NMR (400 MHz,  $CDCl_3$ ):  $\delta$  7.74 – 7.72 (m, 1H, ArH), 7.51 (d,  $J = 8.0$  Hz, 2H, ArH), 7.46 – 7.39 (m, 3H, ArH), 7.32 – 7.29 (m, 2H, ArH), 7.22 (d,  $J = 8.0$  Hz, 2H, ArH), 6.92 (t,  $J = 8.8$  Hz, 2H, ArH), 4.48 (d,  $J = 14.4$  Hz, 1H,  $CH_2$ ), 4.31 (d,  $J = 14.4$  Hz, 1H,  $CH_2$ ), 3.50 (dd,  $J_1 = 12.0$  Hz,  $J_2 = 4.8$  Hz, 1H, CH), 2.59 (dt,  $J_1 = 15.6$  Hz,  $J_2 = 5.6$  Hz, 1H,  $CH_2$ ), 2.38 (s, 3H,  $CH_3$ ), 2.31 – 2.23 (m, 1H,  $CH_2$ ), 2.09 – 2.02 (m, 1H,  $CH_2$ ), 1.85 – 1.67 (m, 2H,  $CH_2$ ), 0.22 – 0.12 (m, 1H,  $CH_2$ ) ppm.  $^{13}C$  NMR (176 MHz,  $CDCl_3$ ):  $\delta$  201.6, 161.6 (d,  $^1J_{C-F} = 244.5$  Hz), 145.2, 140.1, 138.0, 136.8, 135.1, 134.0 (d,  $^4J_{C-F} = 2.5$  Hz), 131.9 (d,  $^2J_{C-F} = 28.2$  Hz), 130.8 (d,  $^3J_{C-F} = 7.9$  Hz), 129.3, 128.4, 125.3, 124.8, 124.3, 122.2, 120.5, 115.0, 114.9, 42.5, 38.0, 35.1, 30.5, 23.1, 21.6 ppm.  $^{19}F$  NMR (376 MHz,  $CDCl_3$ ):  $\delta$  -116.9 ppm. HRMS (ESI):  $m/z$  calcd. for  $C_{29}H_{25}FNO_3S_2$   $[M + H]^+$  518.1254, found 518.1258.

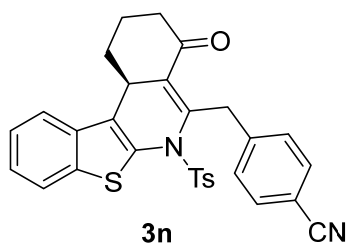

**(S)-4-((4-oxo-6-tosyl-1,2,3,4,6,11c-hexahydrobenzo[4,5]thieno[2,3-c]isoquinolin-5-yl)methyl)benzonitrile (3n).** White solid (45.6 mg, 87% yield), m.p. 174 – 175 °C. HPLC (Daicel Chiralpak AD-H, *n*-hexane/2-propanol = 70/30, flow rate 1.0 mL/min, detection at 254 nm):  $t_R$  = 10.1 min (major),  $t_R$  = 19.7 min (minor); 91% ee.  $[\alpha]_D^{25} = -113.0^\circ$  ( $c = 2.13$ ,  $CH_2Cl_2$ ).  $^1H$  NMR (700 MHz,  $CDCl_3$ ):  $\delta$  7.74 (d,  $J = 7.7$  Hz, 1H, ArH), 7.59 (d,  $J = 7.7$  Hz, 2H, ArH), 7.52 – 7.48 (m, 4H, ArH), 7.42 (d,  $J = 7.7$  Hz, 1H, ArH), 7.34 – 7.30 (m, 2H, ArH), 7.23 (d,  $J = 7.7$  Hz, 2H, ArH), 4.59 (d,  $J = 14.7$  Hz, 1H,  $CH_2$ ), 4.40 (d,  $J = 14.7$  Hz, 1H,  $CH_2$ ), 3.54 (dd,  $J_1 = 11.9$  Hz,  $J_2 = 4.9$  Hz, 1H, CH), 2.61 (dt,  $J_1 = 15.4$  Hz,  $J_2 = 5.3$  Hz, 1H,  $CH_2$ ), 2.39 (s, 3H,  $CH_3$ ), 2.31 – 2.26 (m, 1H,  $CH_2$ ), 2.08 – 2.05 (m, 1H,  $CH_2$ ), 1.85 – 1.79 (m, 1H,  $CH_2$ ), 1.73 –

1.69 (m, 1H, CH<sub>2</sub>), 0.15 – 0.09 (m, 1H, CH<sub>2</sub>) ppm. <sup>13</sup>C NMR (176 MHz, CDCl<sub>3</sub>): δ 201.5, 145.4, 144.0, 138.7, 137.9, 136.5, 134.9, 132.8, 132.1, 131.6, 130.0, 129.4, 128.4, 125.3, 124.9, 124.4, 122.2, 120.5, 119.1, 110.1, 42.3, 37.9, 36.0, 30.4, 22.9, 21.6 ppm. HRMS (ESI): *m/z* calcd. for C<sub>30</sub>H<sub>25</sub>N<sub>2</sub>O<sub>3</sub>S<sub>2</sub> [M + H]<sup>+</sup> 525.1301, found 525.1309.

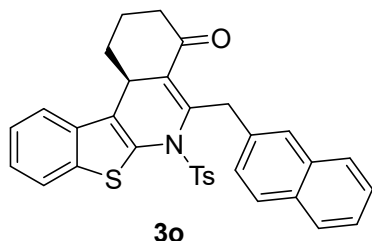

**(S)-5-(naphthalen-2-ylmethyl)-6-tosyl-2,3,6,11c-tetrahydrobenzo[4,5]thieno[2,3-c]isoquinolin-4(1H)-one (3o).** White solid (40.7 mg, 74% yield), m.p. 183 – 185 °C. HPLC (Daicel Chiralpak AD-H, *n*-hexane/2-propanol = 70/30, flow rate 1.0 mL/min, detection at 254 nm): *t<sub>R</sub>* = 9.7 (major), *t<sub>R</sub>* = 18.5 min (minor); 65% ee. [α]<sub>D</sub><sup>25</sup> = –85.3° (*c* = 0.81, CH<sub>2</sub>Cl<sub>2</sub>). <sup>1</sup>H NMR (400 MHz, CDCl<sub>3</sub>): δ 7.91 (s, 1H, ArH), 7.78 – 7.69 (m, 4H, ArH), 7.61 (d, *J* = 8.4 Hz, 1H, ArH), 7.53 (d, *J* = 8.0 Hz, 2H, ArH), 7.38 (s, 3H, ArH), 7.28 – 7.20 (m, 4H, ArH), 4.68 (d, *J* = 14.4 Hz, 1H, CH<sub>2</sub>), 4.54 (d, *J* = 14.4 Hz, 1H, CH<sub>2</sub>), 3.51 (dd, *J*<sub>1</sub> = 11.8 Hz, *J*<sub>2</sub> = 4.2 Hz, 1H, CH), 2.60 (dt, *J*<sub>1</sub> = 15.0 Hz, *J*<sub>2</sub> = 4.6 Hz, 1H, CH<sub>2</sub>), 2.37 (s, 3H, CH<sub>3</sub>), 2.32 – 2.24 (m, 1H, CH<sub>2</sub>), 2.10 – 2.05 (m, 1H, CH<sub>2</sub>), 1.82 – 1.67 (m, 2H, CH<sub>2</sub>), 0.23 – 0.17 (m, 1H, CH<sub>2</sub>) ppm. <sup>13</sup>C NMR (176 MHz, CDCl<sub>3</sub>) δ 201.6, 145.1, 140.4, 138.0, 136.9, 135.9, 135.1, 133.5, 132.2, 132.0, 129.3, 128.5, 128.0, 127.8, 127.7, 127.6, 127.5, 125.6, 125.4, 125.2, 124.7, 124.2, 122.2, 120.5, 42.5, 38.1, 36.2, 30.5, 23.0, 21.6 ppm. HRMS (ESI): *m/z* calcd. for C<sub>33</sub>H<sub>28</sub>NO<sub>3</sub>S<sub>2</sub> [M + H]<sup>+</sup> 550.1505, found 550.1506.

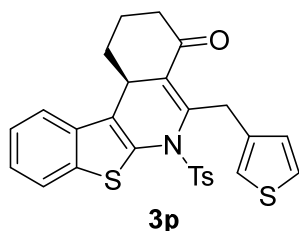

**(S)-5-(thiophen-3-ylmethyl)-6-tosyl-2,3,6,11c-tetrahydrobenzo[4,5]thieno[2,3-c]isoquinolin-4(1H)-one (3p).** White solid (41.9 mg, 83% yield), m.p. 184 – 185 °C. HPLC (Daicel Chiralpak AD-H, *n*-hexane/2-propanol = 70/30, flow rate 1.0 mL/min, detection at 254 nm): *t<sub>R</sub>* = 15.9 min (major), *t<sub>R</sub>* = 32.3 min (minor); 97% ee. [α]<sub>D</sub><sup>25</sup> = –122.5° (*c* = 2.61, CH<sub>2</sub>Cl<sub>2</sub>). <sup>1</sup>H NMR (400 MHz, CDCl<sub>3</sub>): δ 7.75 – 7.73 (m, 1H, ArH), 7.50 (d, *J* = 8.4 Hz, 2H, ArH), 7.42 – 7.39 (m, 1H, ArH), 7.33 – 7.28 (m, 2H, ArH), 7.25 – 7.20 (m, 3H, ArH), 7.16 – 7.14 (m, 2H, ArH), 4.55 (d, *J* = 14.8 Hz, 1H, CH<sub>2</sub>), 4.34 (d, *J* = 14.8 Hz, 1H, CH<sub>2</sub>), 3.47 (dd, *J*<sub>1</sub> = 15.8 Hz, *J*<sub>2</sub> = 5.0 Hz, 1H, CH<sub>2</sub>), 2.57 (dt, *J*<sub>1</sub> = 15.6 Hz, *J*<sub>2</sub> = 5.6 Hz, 1H, CH<sub>2</sub>), 2.38 (s, 3H, CH<sub>3</sub>), 2.29 –

2.21 (m, 1H, CH<sub>2</sub>), 2.12 – 2.05 (m, 1H, CH<sub>2</sub>), 1.84 – 1.64 (m, 2H, CH<sub>2</sub>), 0.29 – 0.19 (m, 1H, CH<sub>2</sub>) ppm. <sup>13</sup>C NMR (176 MHz, CDCl<sub>3</sub>): δ 201.5, 145.1, 140.3, 138.2, 138.0, 136.9, 135.1, 132.0, 131.4, 129.3, 128.8, 128.4, 125.4, 124.8, 124.7, 124.2, 122.6, 122.2, 120.5, 42.3, 37.9, 31.2, 30.4, 22.8, 21.6 ppm. HRMS (ESI): *m/z* calcd. for C<sub>27</sub>H<sub>23</sub>NaNO<sub>3</sub>S<sub>3</sub> [M + Na]<sup>+</sup> 528.0732, found 528.0740.

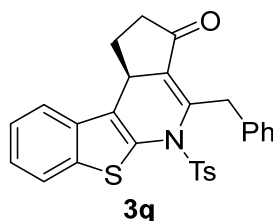

**(S)-4-benzyl-5-tosyl-1,2,5,10c-tetrahydro-3H-benzo[4,5]thieno[2,3-**

**b]cyclopenta[d]pyridin-3-one (3q).** White solid (38.8 mg, 80% yield), m.p. 180 – 181 °C. HPLC (Daicel Chiralpak AD-H, *n*-hexane/2-propanol = 70/30, flow rate 1.0 mL/min, detection at 254 nm): *t<sub>R</sub>* = 9.6 min (minor), *t<sub>R</sub>* = 10.7 min (major); 70% ee. [α]<sub>D</sub><sup>25</sup> = –137.0° (*c* = 1.69, CH<sub>2</sub>Cl<sub>2</sub>). <sup>1</sup>H NMR (400 MHz, CDCl<sub>3</sub>): δ 7.74 – 7.72 (m, 1H, ArH), 7.60 – 7.58 (m, 1H, ArH), 7.45 (d, *J* = 8.4 Hz, 2H, ArH), 7.32 – 7.29 (m, 2H, ArH), 7.24 – 7.19 (m, 4H, ArH), 7.16 – 7.14 (m, 3H, ArH), 5.34 (d, *J* = 14.8 Hz, 1H, CH<sub>2</sub>), 4.39 (dd, *J*<sub>1</sub> = 14.8 Hz, *J*<sub>2</sub> = 2.8 Hz, 1H, CH<sub>2</sub>), 2.83 – 2.74 (m, 2H, CH<sub>2</sub>), 2.47 – 2.28 (m + s, 5H, CH<sub>2</sub> + CH<sub>3</sub>), 1.94 – 1.82 (m, 1H, CH<sub>2</sub>) ppm. <sup>13</sup>C NMR (176 MHz, CDCl<sub>3</sub>) δ 204.8, 148.9, 145.1, 139.4, 138.0, 136.7, 134.7, 133.0, 130.6, 130.3, 129.6, 129.0, 128.3, 127.8, 126.4, 124.6, 124.2, 122.7, 122.5, 39.1, 38.4, 35.3, 26.9, 21.7 ppm. HRMS (ESI): *m/z* calcd. for C<sub>28</sub>H<sub>23</sub>NNaO<sub>3</sub>S<sub>2</sub> [M + Na]<sup>+</sup> 508.1012, found 508.1003.

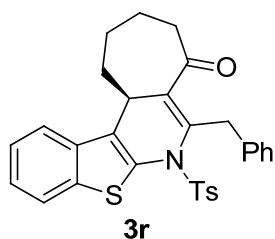

**(S)-6-benzyl-7-tosyl-1,2,3,4,7,12c-hexahydro-5H-benzo[4,5]thieno[2,3-**

**b]cyclohepta[d]pyridin-5-one (3r).** White solid (42.1 mg, 82% yield), m.p. 182 – 183 °C. HPLC (Daicel Chiralpak AD-H, *n*-hexane/2-propanol = 70/30, flow rate 1.0 mL/min, detection at 254 nm): *t<sub>R</sub>* = 10.4 min (minor), *t<sub>R</sub>* = 13.5 min (major); 92% ee. [α]<sub>D</sub><sup>25</sup> = –155.8° (*c* = 2.29, CH<sub>2</sub>Cl<sub>2</sub>). <sup>1</sup>H NMR (400 MHz, CDCl<sub>3</sub>): δ 7.72 – 7.68 (m, 1H, ArH), 7.61 (d, *J* = 8.4 Hz, 2H, ArH), 7.39 – 7.37 (m, 3H, ArH), 7.32 – 7.27 (m, 2H, ArH), 7.24 – 7.20 (m, 4H, ArH), 7.15 (t, *J* = 7.2 Hz, 1H, ArH), 4.47 (d, *J* = 15.2 Hz, 1H, CH<sub>2</sub>), 4.17 (d, *J* = 15.2 Hz, 1H, CH<sub>2</sub>), 3.49 (dd, *J*<sub>1</sub> = 12.0 Hz, *J*<sub>2</sub> = 2.4 Hz, 1H, CH<sub>2</sub>), 2.67 – 2.49 (m, 2H, CH<sub>2</sub>), 2.36 (s, 3H, CH<sub>3</sub>), 1.87 – 1.83 (m, 1H, CH<sub>2</sub>), 1.65 – 1.60 (m, 1H, CH<sub>2</sub>), 1.55 – 1.35 (m, 2H, CH<sub>2</sub>), –0.15 – –0.25 (m, 1H, CH<sub>2</sub>)

ppm.  $^{13}\text{C}$  NMR (176 MHz,  $\text{CDCl}_3$ )  $\delta$  205.4, 144.9, 142.3, 138.7, 138.0, 136.5, 135.7, 134.4, 133.8, 129.5, 129.1, 128.8, 128.2, 128.1, 126.2, 124.6, 124.3, 122.3, 119.7, 43.8, 37.3, 36.9, 36.7, 30.0, 23.2, 21.5 ppm. HRMS (ESI):  $m/z$  calcd. for  $\text{C}_{30}\text{H}_{27}\text{NNaO}_3\text{S}_2$   $[\text{M} + \text{H}]^+$  536.1325, found 536.1327.

### 3. Synthetic procedure and the characterization data of compound 4

To solution of **3a** (89.9 mg, 0.2 mmol), phenylhydrazine (43.2 mg, 0.4 mmol), and concentrated sulfuric acid (4.0 mg, 0.04 mmol) in isopropanol (4 mL), and the resulting suspension was stirred at 85 °C (oil bath temperature) for 12 h. Then concentrated the mixture. The residue was purified by flash column chromatography on silica gel (petroleum ether/ethyl acetate = 15/1 – 10/1) to afford compound **4**.

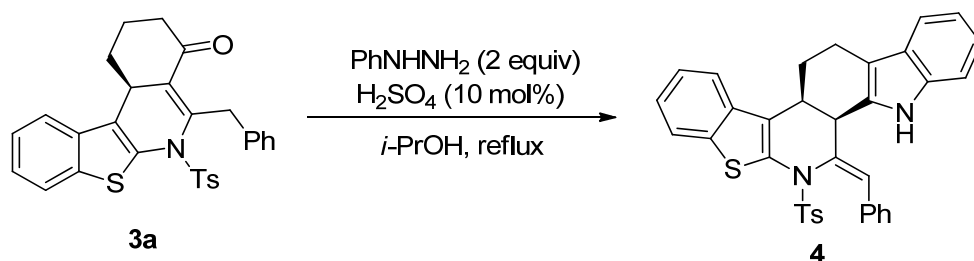

**(5bS,12cS,Z)-6-benzylidene-7-tosyl-5b,6,7,12c,13,14-hexahydro-5H-benzo[4',5']thieno-[3',2':5,6]pyrido[3,4-a]carbazole (4)**. White solid (47.0 mg, 41% yield), m.p. 169 – 170 °C. HPLC (Daicel Chiralpak AD-H, *n*-hexane/2-propanol = 70/30, flow rate 1.0 mL/min, detection at 254 nm):  $t_R$  = 5.4 min (minor),  $t_R$  = 7.5 min (major); >99% ee.  $[\alpha]_D^{25} = +85.2^\circ$  ( $c$  = 1.85,  $\text{CH}_2\text{Cl}_2$ ).  $^1\text{H}$  NMR (400 MHz,  $\text{CDCl}_3$ ):  $\delta$  7.83 – 7.80 (m, 2H, ArH), 7.74 (d,  $J$  = 8.0 Hz, 2H, ArH), 7.61 (dd,  $J_1$  = 7.4 Hz,  $J_2$  = 1.8 Hz, 1H, ArH), 7.54 – 7.49 (m, 3H, ArH), 7.45 (d,  $J$  = 8.4 Hz, 1H, ArH), 7.39 – 7.33 (m, 2H, ArH), 7.29 – 7.21 (m, 6H, ArH + NH), 7.15 (t,  $J$  = 7.4 Hz, 1H, ArH), 6.01 (s, 1H, CH), 3.27 – 3.24 (m, 2H, CH + CH), 2.91 – 2.75 (m, 2H,  $\text{CH}_2$ ), 2.40 – 2.35 (m, 4H,  $\text{CH}_2$  +  $\text{CH}_3$ ), 1.84 – 1.72 (m, 1H,  $\text{CH}_2$ ) ppm.  $^{13}\text{C}$  NMR (176 MHz,  $\text{CDCl}_3$ ):  $\delta$  145.0, 136.54, 136.48, 136.41, 136.36, 134.6, 134.5, 134.4, 130.6, 130.2, 129.9, 129.6, 128.3, 128.2, 127.8, 127.0, 124.5, 124.4, 124.3, 122.5, 122.3, 120.8, 119.6, 118.4, 112.9, 111.0, 36.8, 36.6, 24.7, 21.6, 20.8 ppm. HRMS (ESI):  $m/z$  calcd. for  $\text{C}_{35}\text{H}_{29}\text{N}_2\text{O}_2\text{S}_2$   $[\text{M} + \text{H}]^+$  573.1665, found 573.1665.

#### 4. Crystal data and structure refinement

##### Crystal data and structure refinement for 3n

---

|                                             |                                                                              |
|---------------------------------------------|------------------------------------------------------------------------------|
| Identification code                         | CCDC 2254460                                                                 |
| Empirical formula                           | C <sub>30</sub> H <sub>24</sub> N <sub>2</sub> O <sub>3</sub> S <sub>2</sub> |
| Formula weight                              | 524.63                                                                       |
| Temperature/K                               | 296(2)                                                                       |
| Crystal system                              | orthorhombic                                                                 |
| Space group                                 | P2 <sub>1</sub> P2 <sub>1</sub> P2 <sub>1</sub>                              |
| a/Å                                         | 10.378(2)                                                                    |
| b/Å                                         | 13.432(3)                                                                    |
| c/Å                                         | 18.562(4)                                                                    |
| α/°                                         | 90                                                                           |
| β/°                                         | 90                                                                           |
| γ/°                                         | 90                                                                           |
| Volume/Å <sup>3</sup>                       | 2587(10)                                                                     |
| Z                                           | 4                                                                            |
| ρ <sub>calc</sub> /cm <sup>3</sup>          | 1.347                                                                        |
| μ/mm <sup>-1</sup>                          | 0.241                                                                        |
| F(000)                                      | 1096                                                                         |
| Crystal size/mm <sup>3</sup>                | 0.200 × 0.200 × 0.200                                                        |
| Radiation                                   | MoKα (λ = 0.71073)                                                           |
| 2θ range for data collection/°              | 5.960 to 50.208                                                              |
| Index ranges                                | -12 ≤ h ≤ 12, -15 ≤ k ≤ 15, -22 ≤ l ≤ 21                                     |
| Reflections collected                       | 58680                                                                        |
| Independent reflections                     | 4590 [R <sub>(int)</sub> = 0.1196]                                           |
| Data/restraints/parameters                  | 4590/24/345                                                                  |
| Goodness-of-fit on F <sup>2</sup>           | 1.035                                                                        |
| Final R indexes [I ≥ 2σ (I)]                | R <sub>1</sub> = 0.0540, wR <sub>2</sub> = 0.0992                            |
| Final R indexes [all data]                  | R <sub>1</sub> = 0.1125, wR <sub>2</sub> = 0.1197                            |
| Largest diff. peak/hole / e Å <sup>-3</sup> | 0.210/-0.259                                                                 |
| Absolute structure parameter                | -0.01(4)                                                                     |

---

### Crystal data and structure refinement for 4

---

|                                             |                                                                              |
|---------------------------------------------|------------------------------------------------------------------------------|
| Identification code                         | CCDC 2270502                                                                 |
| Empirical formula                           | C <sub>35</sub> H <sub>28</sub> N <sub>2</sub> O <sub>2</sub> S <sub>2</sub> |
| Formula weight                              | 572.71                                                                       |
| Temperature/K                               | 300(2)                                                                       |
| Crystal system                              | orthorhombic                                                                 |
| Space group                                 | P2 <sub>1</sub> P2 <sub>1</sub> P2 <sub>1</sub>                              |
| a/Å                                         | 9.6474(14)                                                                   |
| b/Å                                         | 13.1696(19)                                                                  |
| c/Å                                         | 22.923(3)                                                                    |
| α/°                                         | 90                                                                           |
| β/°                                         | 90                                                                           |
| γ/°                                         | 90                                                                           |
| Volume/Å <sup>3</sup>                       | 2912.5(7)                                                                    |
| Z                                           | 4                                                                            |
| ρ <sub>calc</sub> /cm <sup>3</sup>          | 1.306                                                                        |
| μ/mm <sup>-1</sup>                          | 1.931                                                                        |
| F(000)                                      | 1200                                                                         |
| Crystal size/mm <sup>3</sup>                | 0.200 × 0.100 × 0.080                                                        |
| Radiation                                   | CuKα (λ = 1.54178)                                                           |
| 2θ range for data collection/°              | 7.714 to 134.732                                                             |
| Index ranges                                | -11 ≤ h ≤ 11, -13 ≤ k ≤ 15, -27 ≤ l ≤ 27                                     |
| Reflections collected                       | 30681                                                                        |
| Independent reflections                     | 5189 [R <sub>(int)</sub> = 0.0984]                                           |
| Data/restraints/parameters                  | 5189/0/323                                                                   |
| Goodness-of-fit on F <sup>2</sup>           | 1.072                                                                        |
| Final R indexes [I ≥ 2σ (I)]                | R <sub>1</sub> = 0.0706, wR <sub>2</sub> = 0.1865                            |
| Final R indexes [all data]                  | R <sub>1</sub> = 0.0904, wR <sub>2</sub> = 0.2164                            |
| Largest diff. peak/hole / e Å <sup>-3</sup> | 0.205/-0.524                                                                 |
| Absolute structure parameter                | -0.090(13)                                                                   |

---

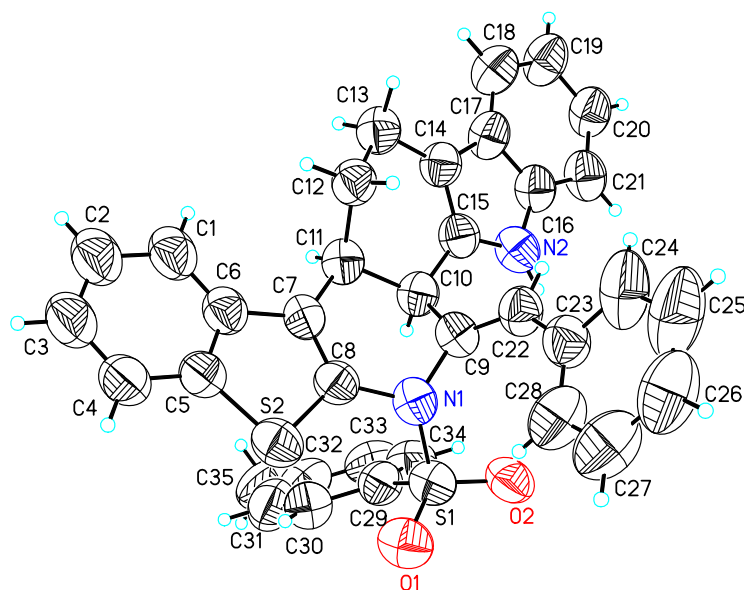

**Fig. S1.** X-ray structure of **4**

## 5. Reference

- [1] C. Niu, D.-H. Xie and D.-M. Du, Isothiourea-catalysed enantioselective annulation of 2-aminobenzothiophenes with  $\alpha,\beta$ -unsaturated anhydrides, *Org. Chem. Front.*, 2022, **9**, 5551-5556.
- [2] a) V. Rauniyar, Z. J. Wang, H. E. Burks and F. D. Toste, Enantioselective synthesis of highly substituted furans by a copper(II)-catalyzed cycloisomerization-indole addition reaction, *J. Am. Chem. Soc.*, 2011, **133**, 8486-8489. b) Q. Li, Z. L. Wang, H. X. Lu and Y. H. Xu, Copper-catalyzed enantioselective 1,4-protosilylation of alkynyl-substituted enones to synthesize the highly diastereomeric chiral homoallenylsilanes, *Org. Lett.*, 2022, **24**, 2832-2836. c) Z. Li, H. Zhou and J. Xu, Access to chiral polycyclic 1,4-dihydropyridines via organocatalytic formal [3 + 3] annulation of 2-(1-alkynyl)-2-alken-1-ones with 3-aminobenzofurans, *Org. Lett.*, 2021, **23**, 6391-6395.
- [3] a) W. Yang and D.-M. Du, Highly enantioselective Michael addition of nitroalkanes to chalcones using chiral squaramides as hydrogen bonding organocatalysts, *Org. Lett.*, 2010, **12**, 5450-5453. b) Y. Lin, Y.-X. Song and D.-M. Du, Enantioselective synthesis of CF<sub>3</sub>-containing 3,2'-pyrrolidinyl spirooxindoles and dispirooxindoles via thiourea-catalyzed domino Michael/Mannich [3 + 2] cycloaddition reactions, *Adv. Synth. Catal.*, 2019, **361**, 1064-1070. c) N. Hara, S. Nakamura, M. Sano, R. Tamura, Y. Funahashi and N. Shibata, Enantioselective synthesis of AG-041R by using *N*-heteroarenesulfonyl cinchona alkaloid amides as organocatalysts, *Chem. Eur. J.*, 2012, **18**, 9276-9280.

## 6. Copies of $^1\text{H}$ and $^{13}\text{C}$ NMR spectra of new compounds

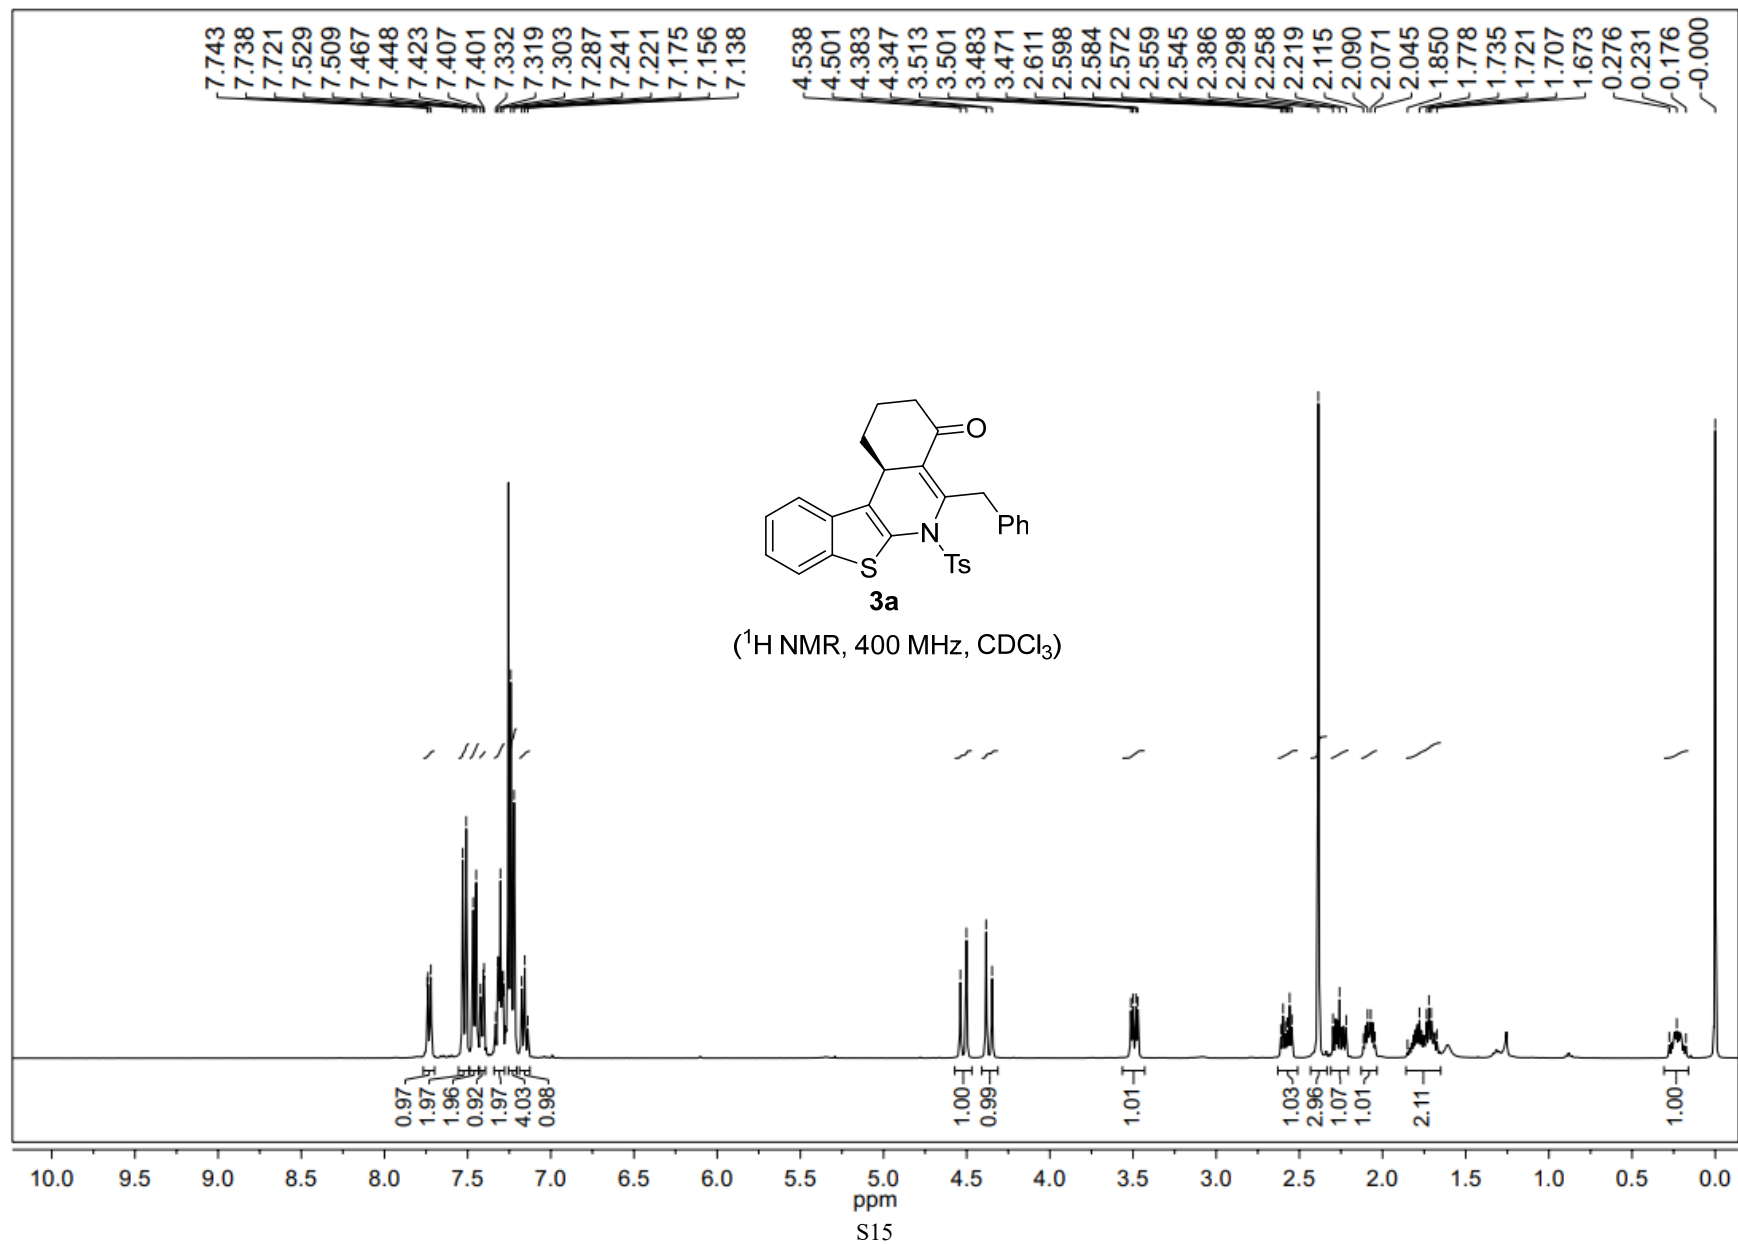



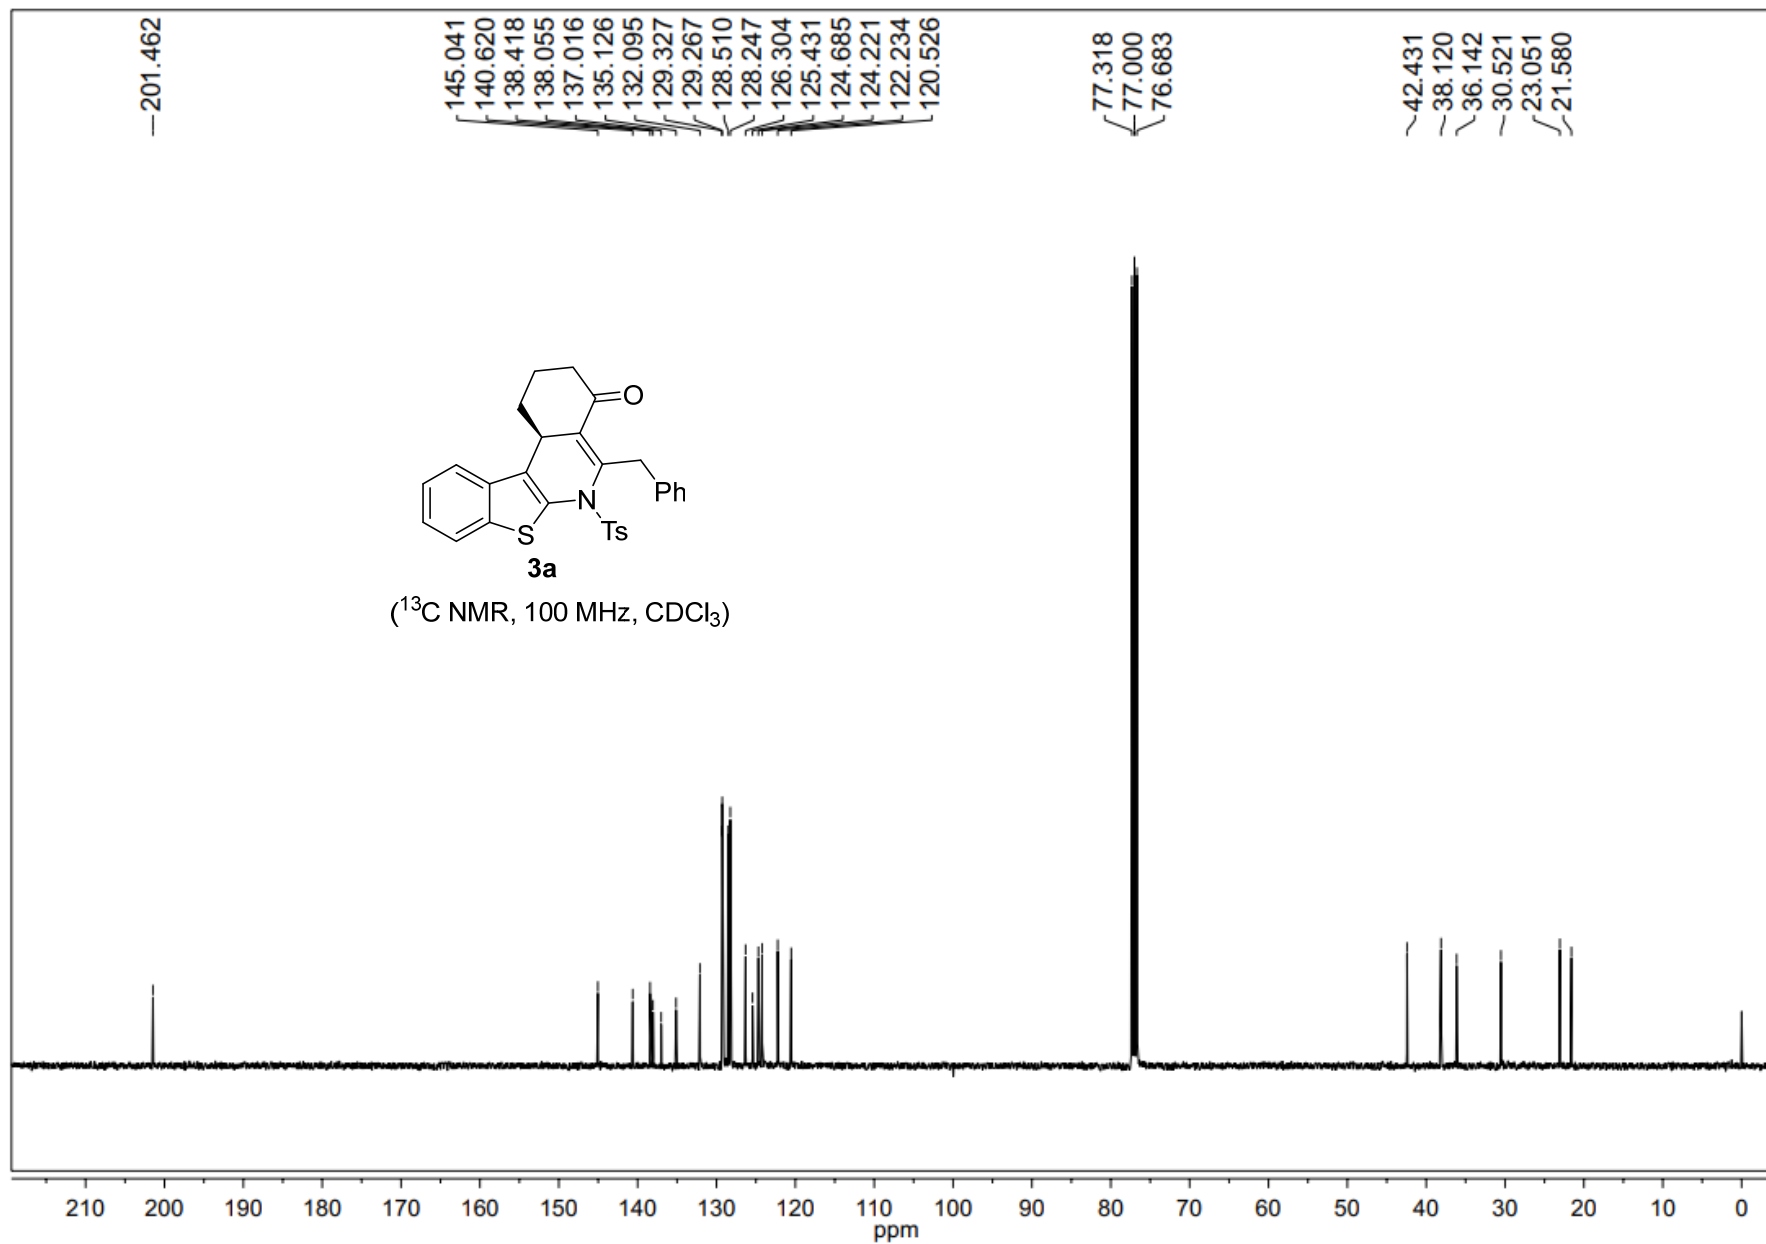

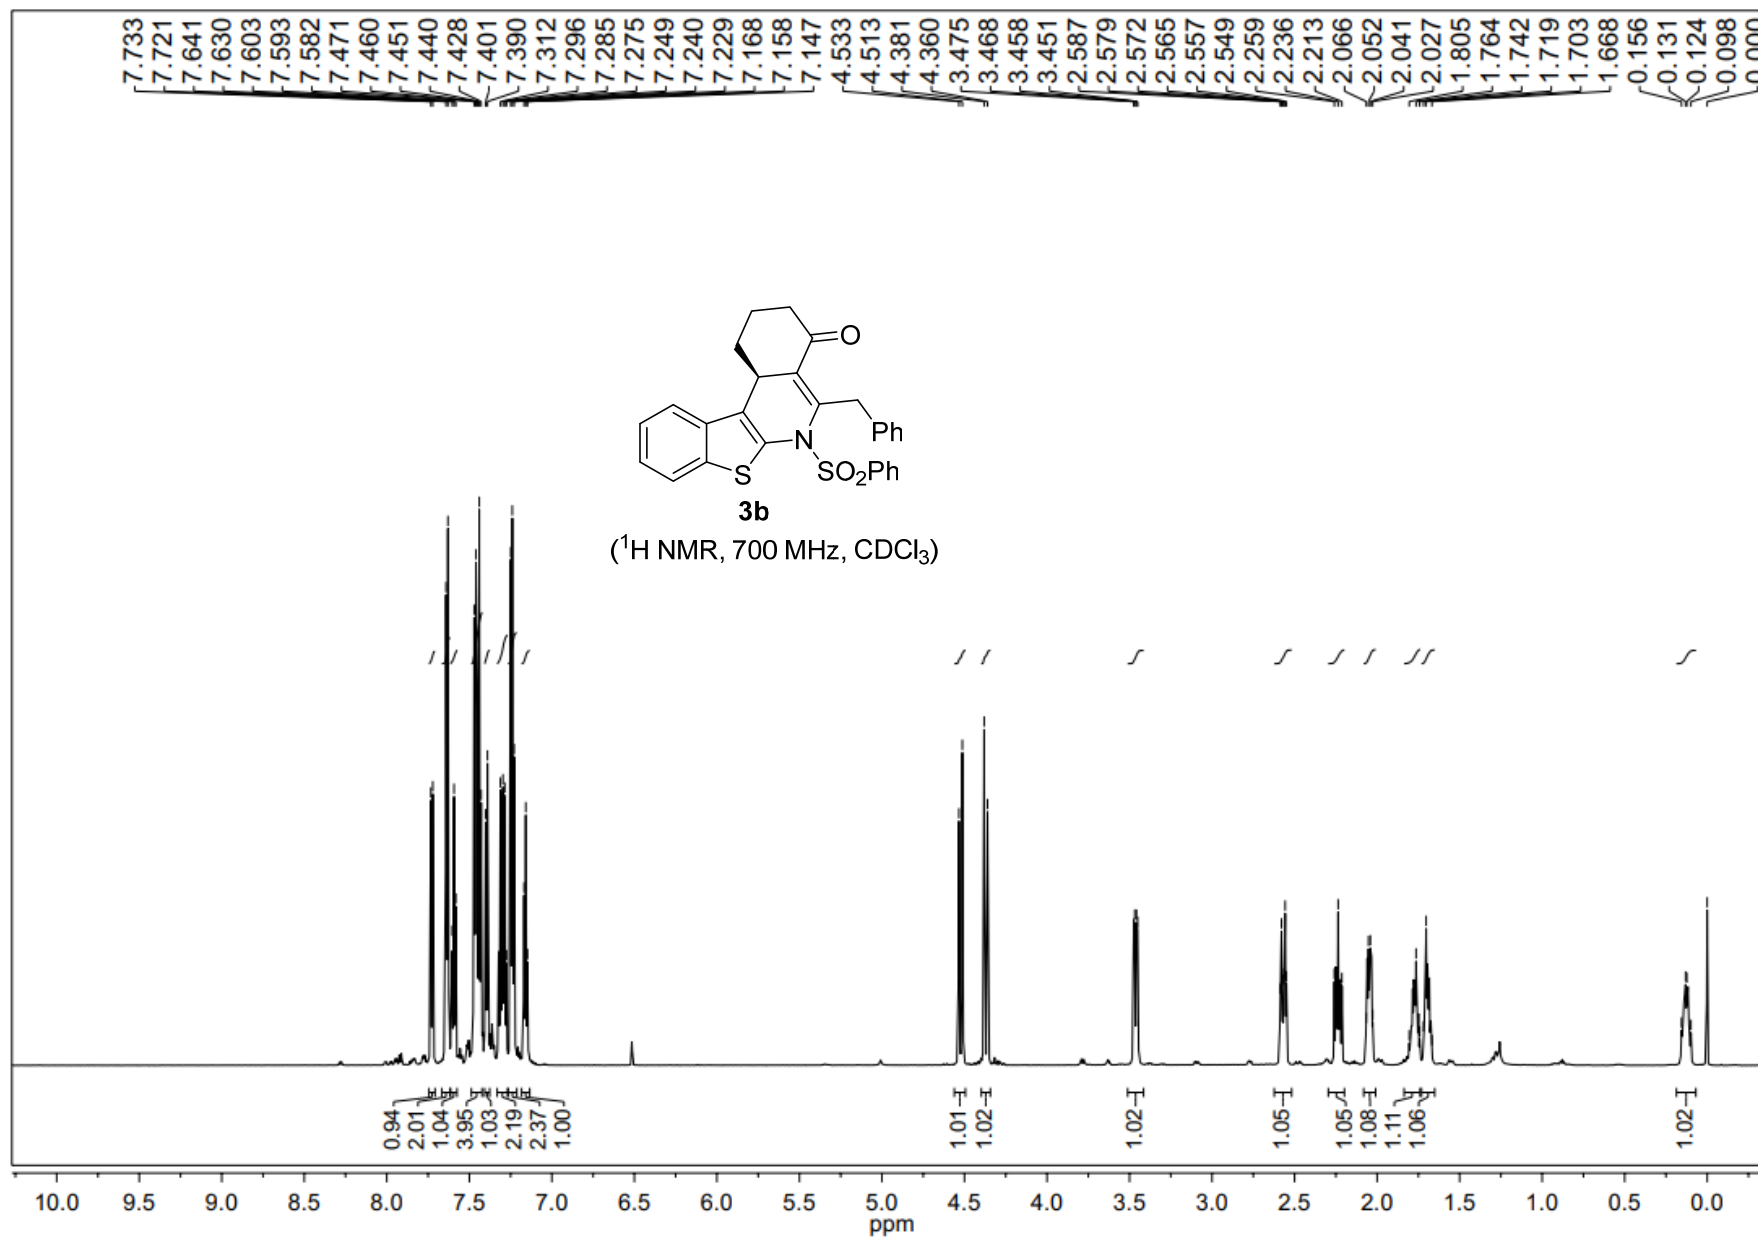

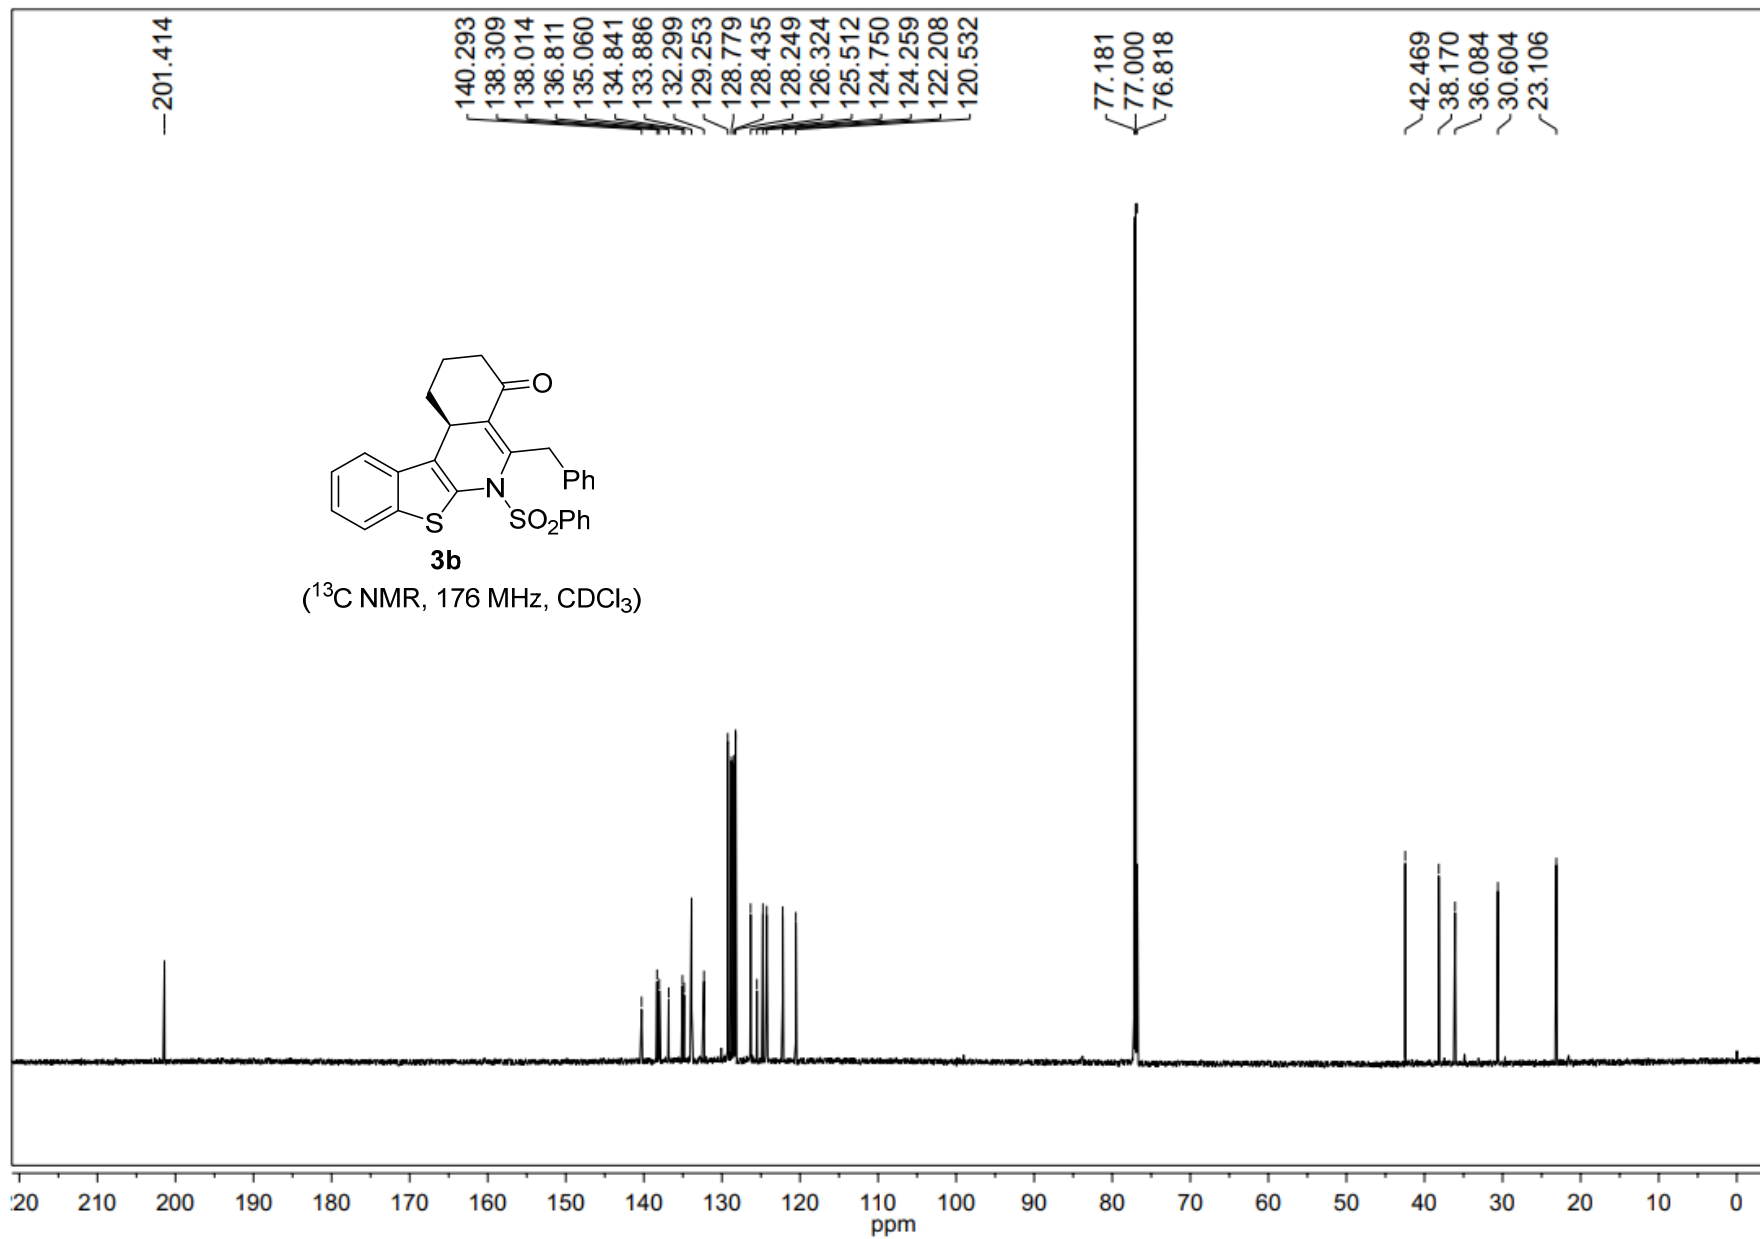

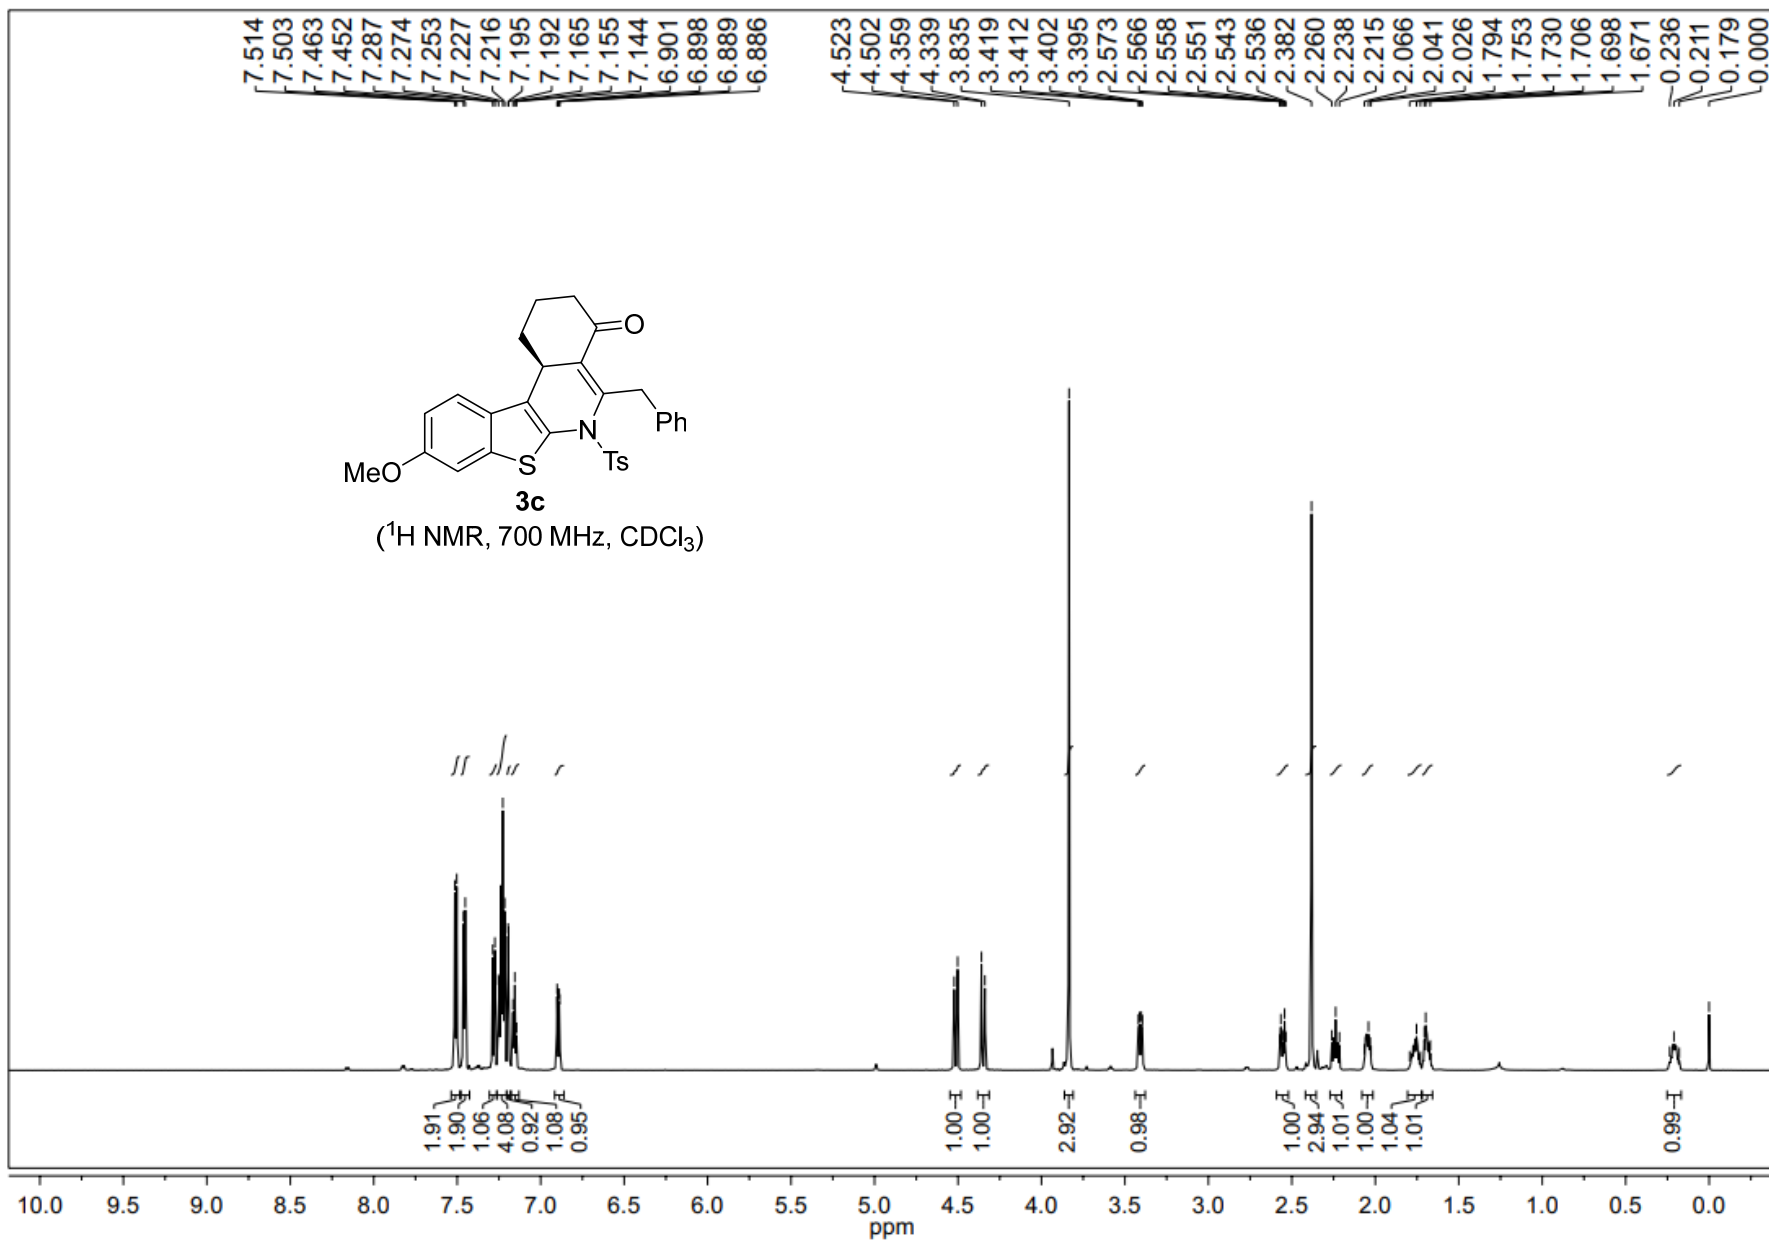

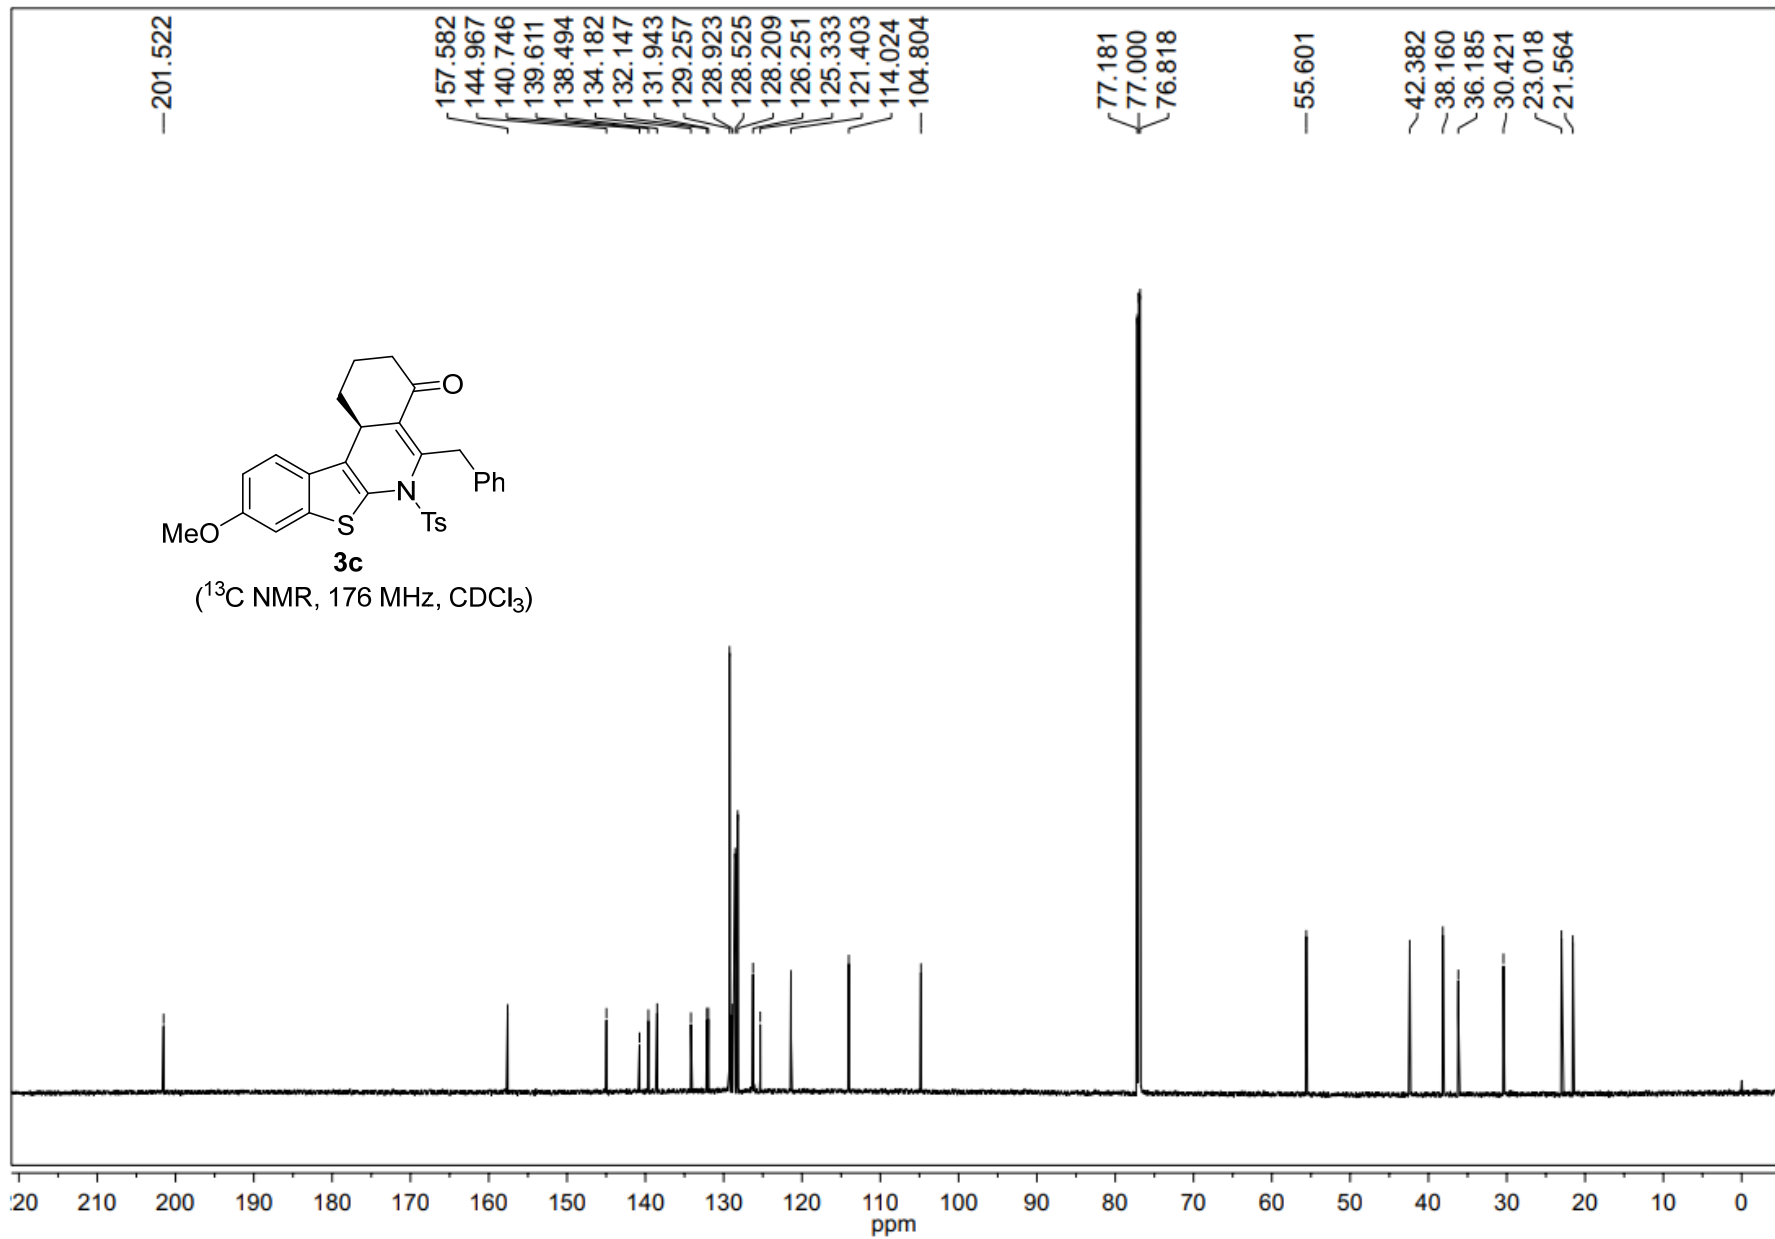

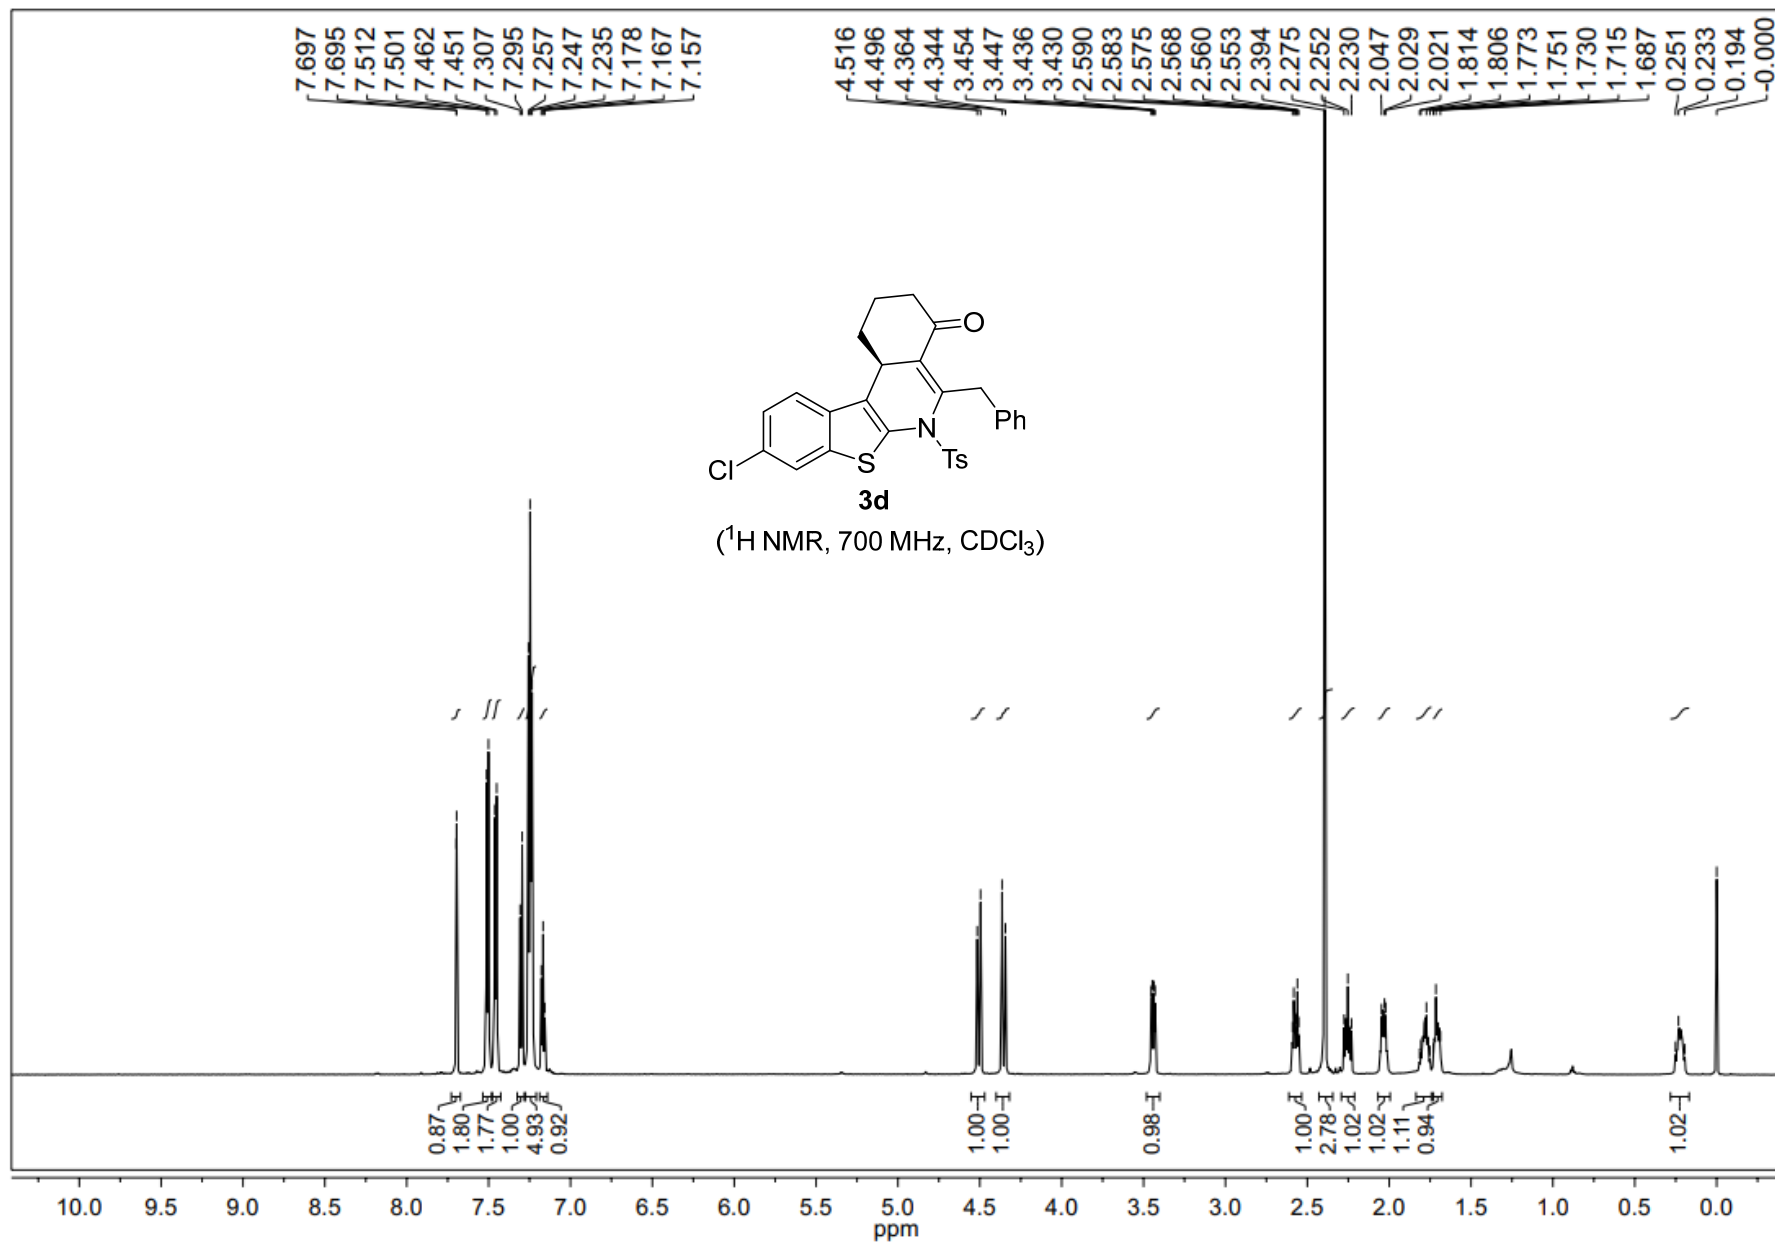

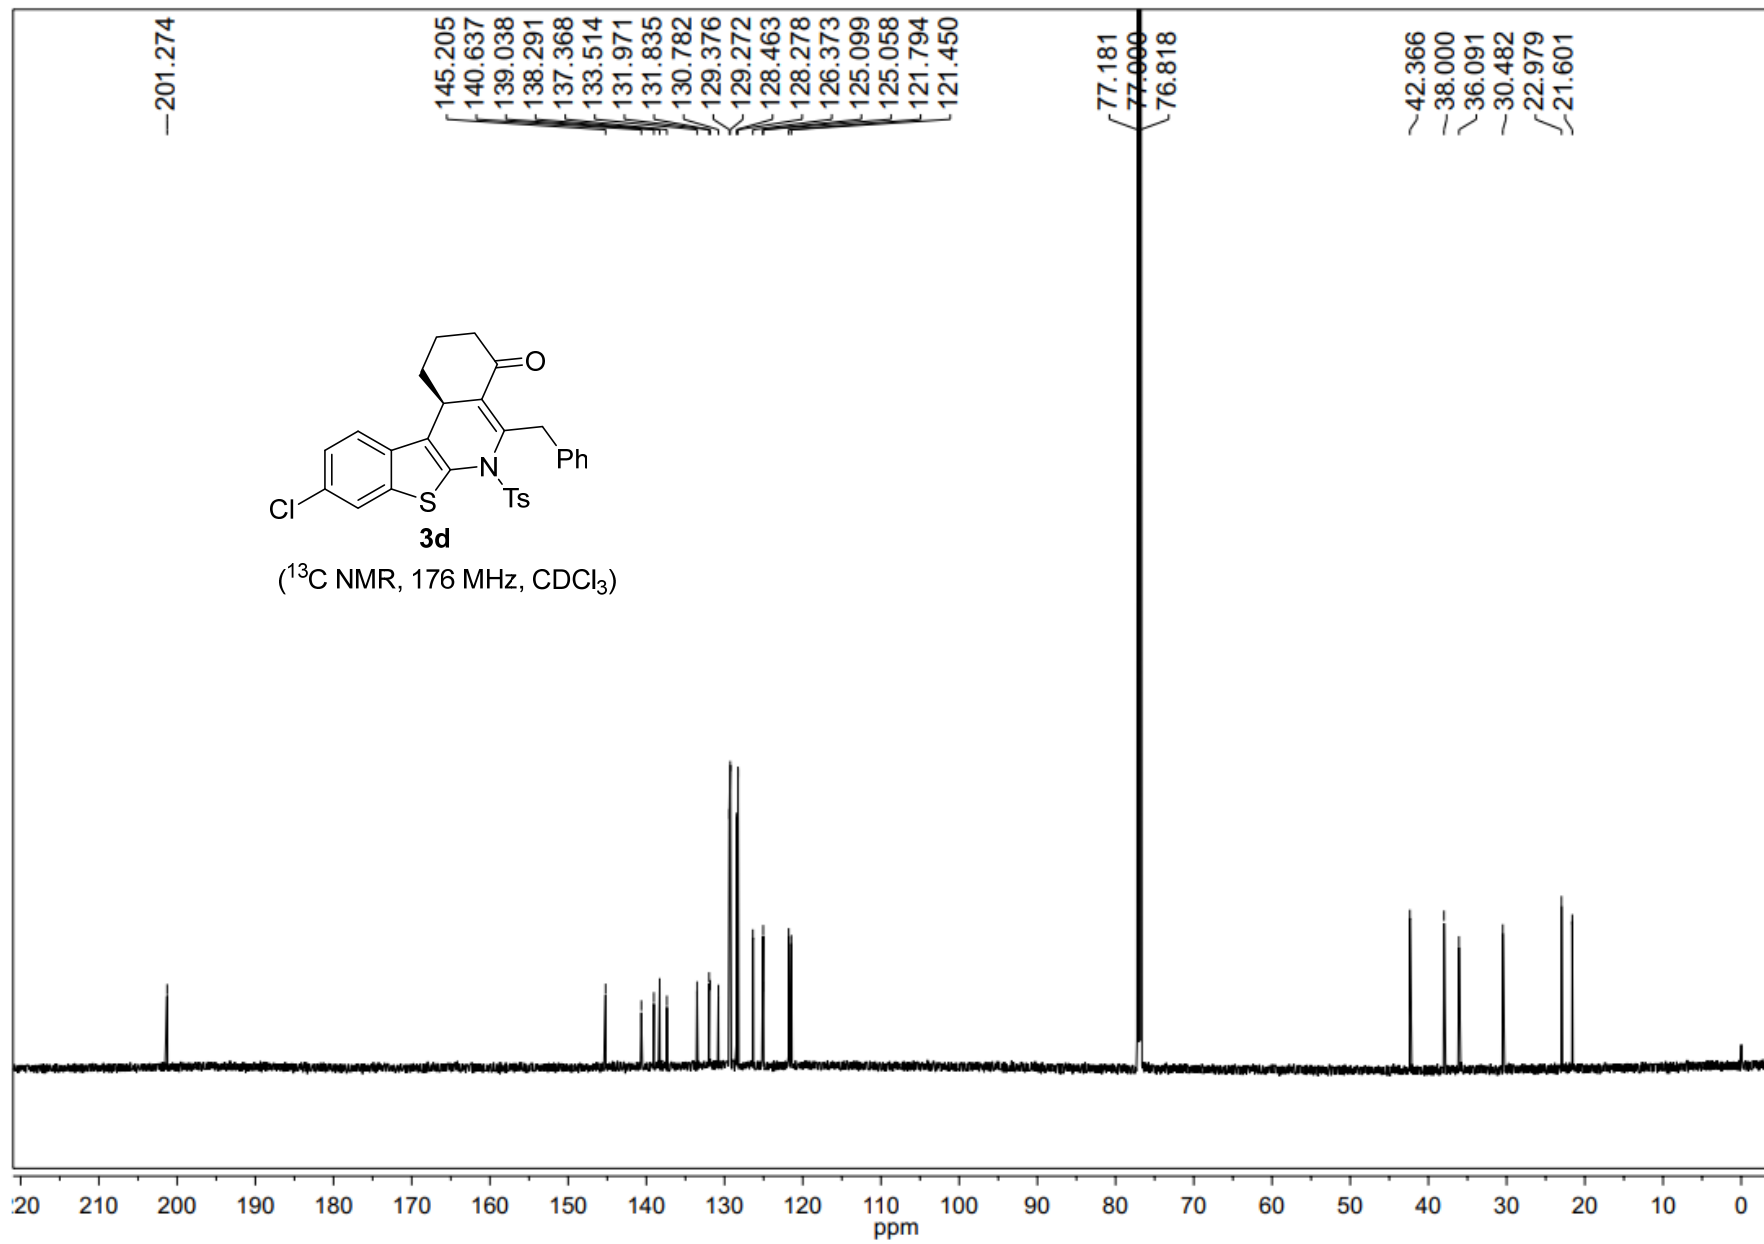

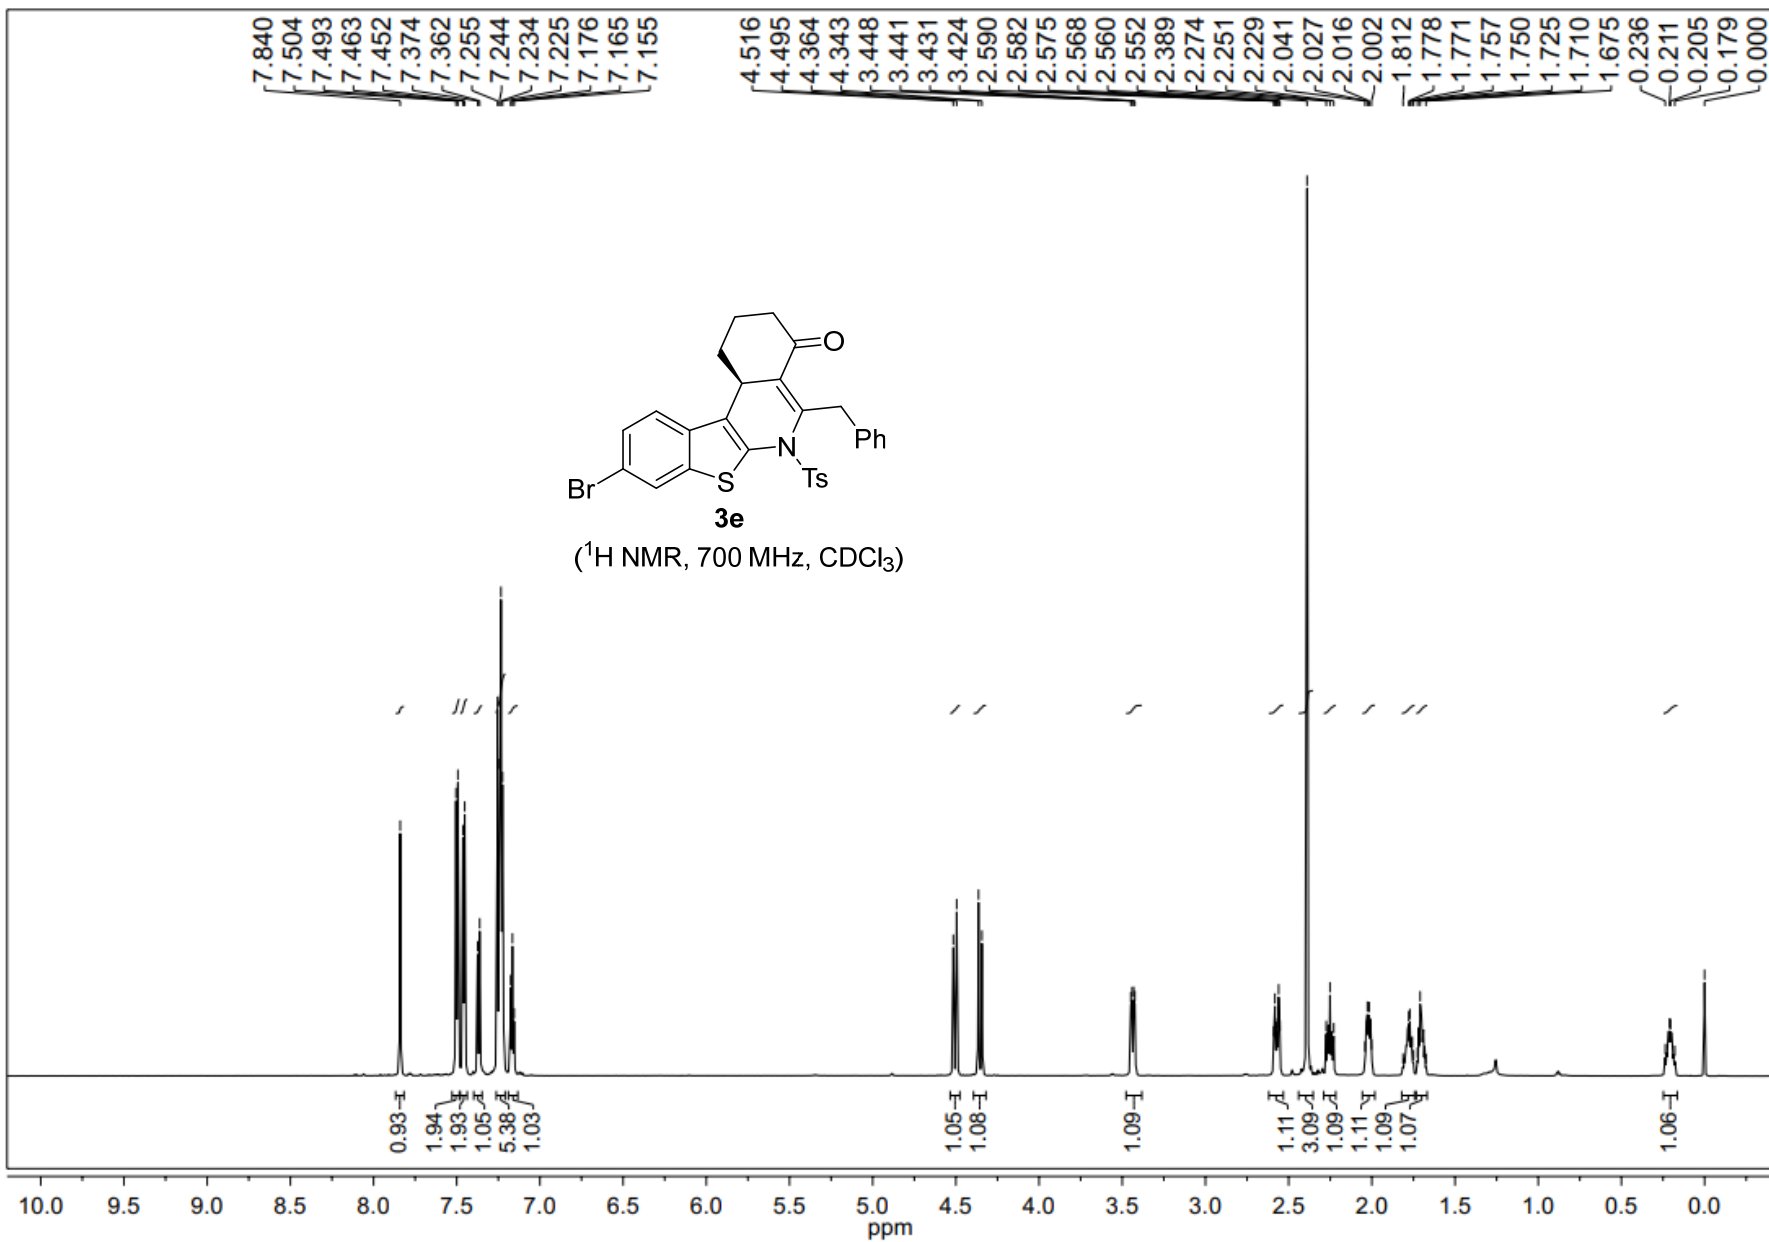



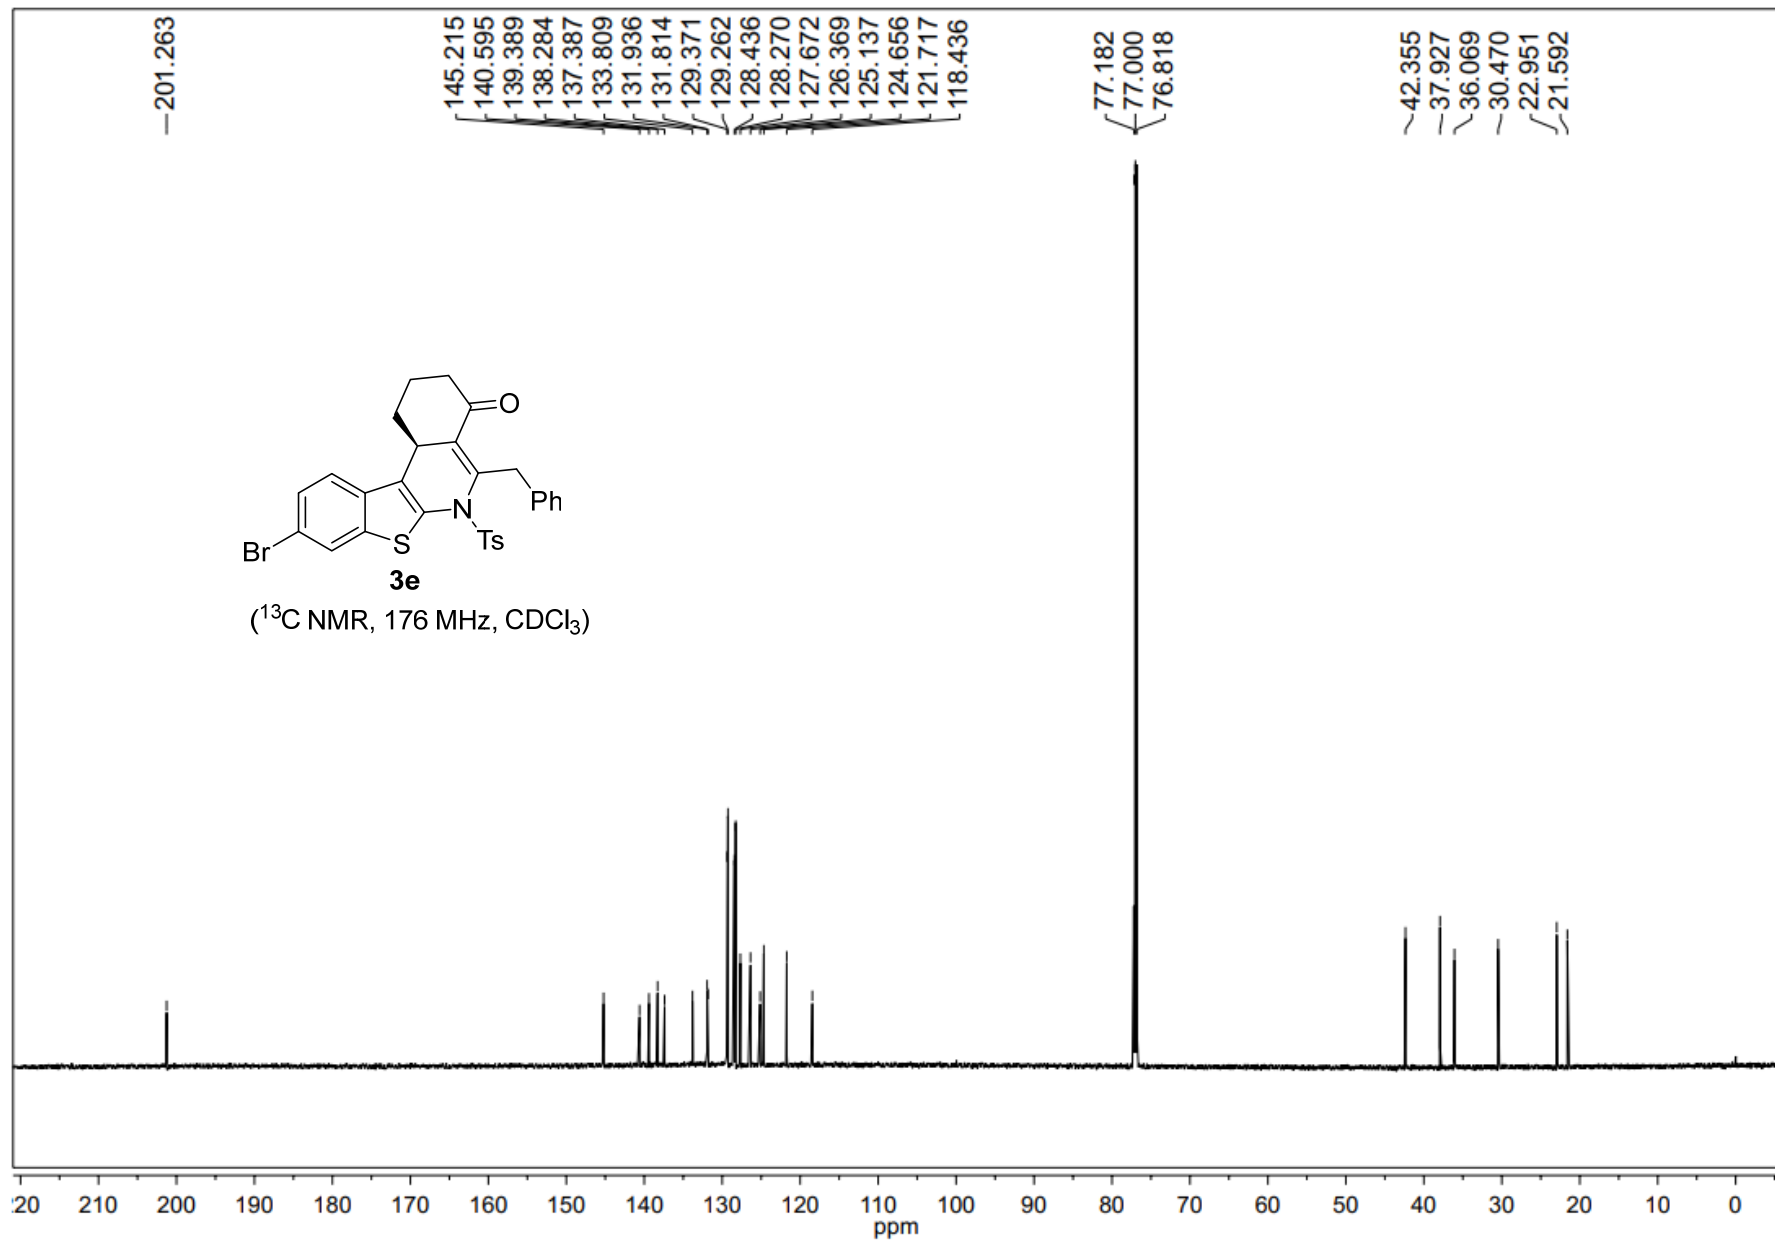

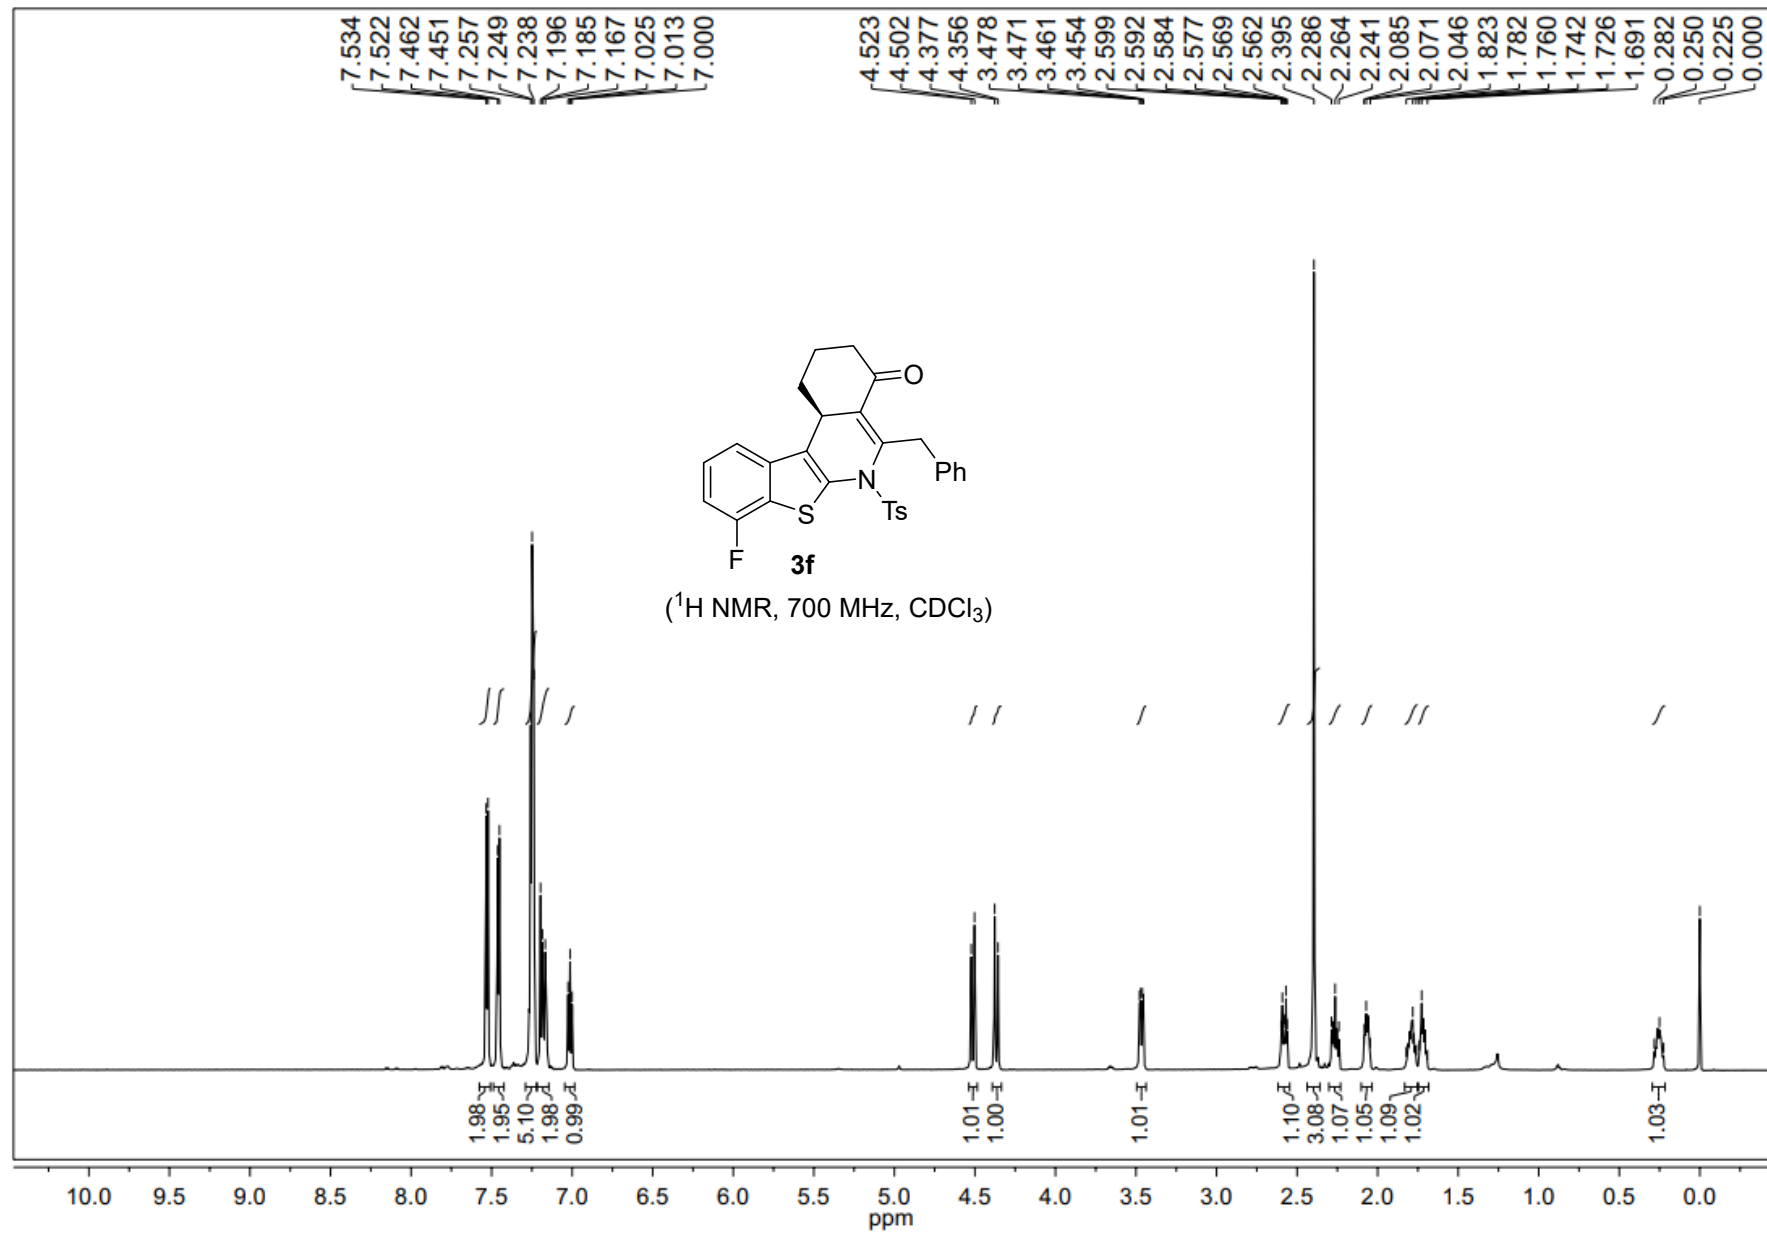

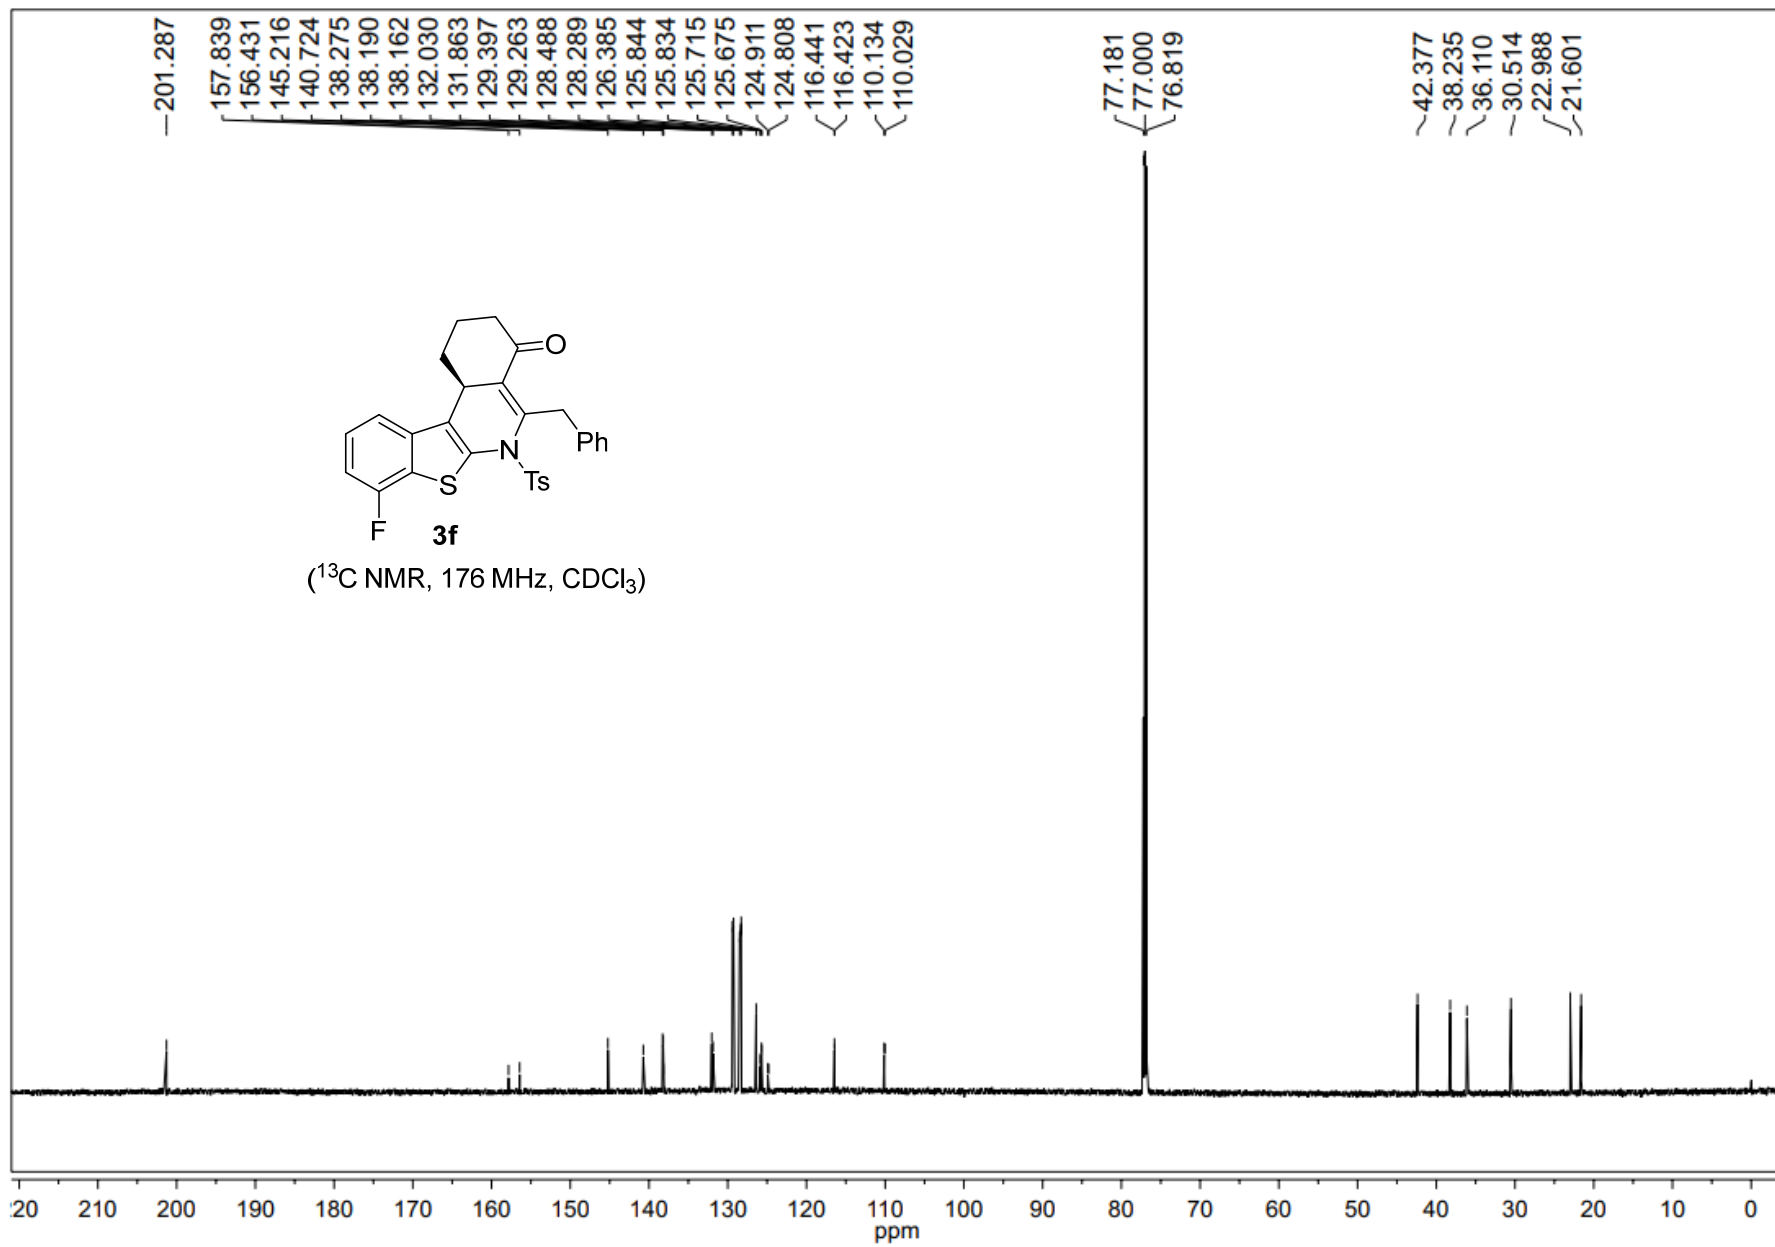

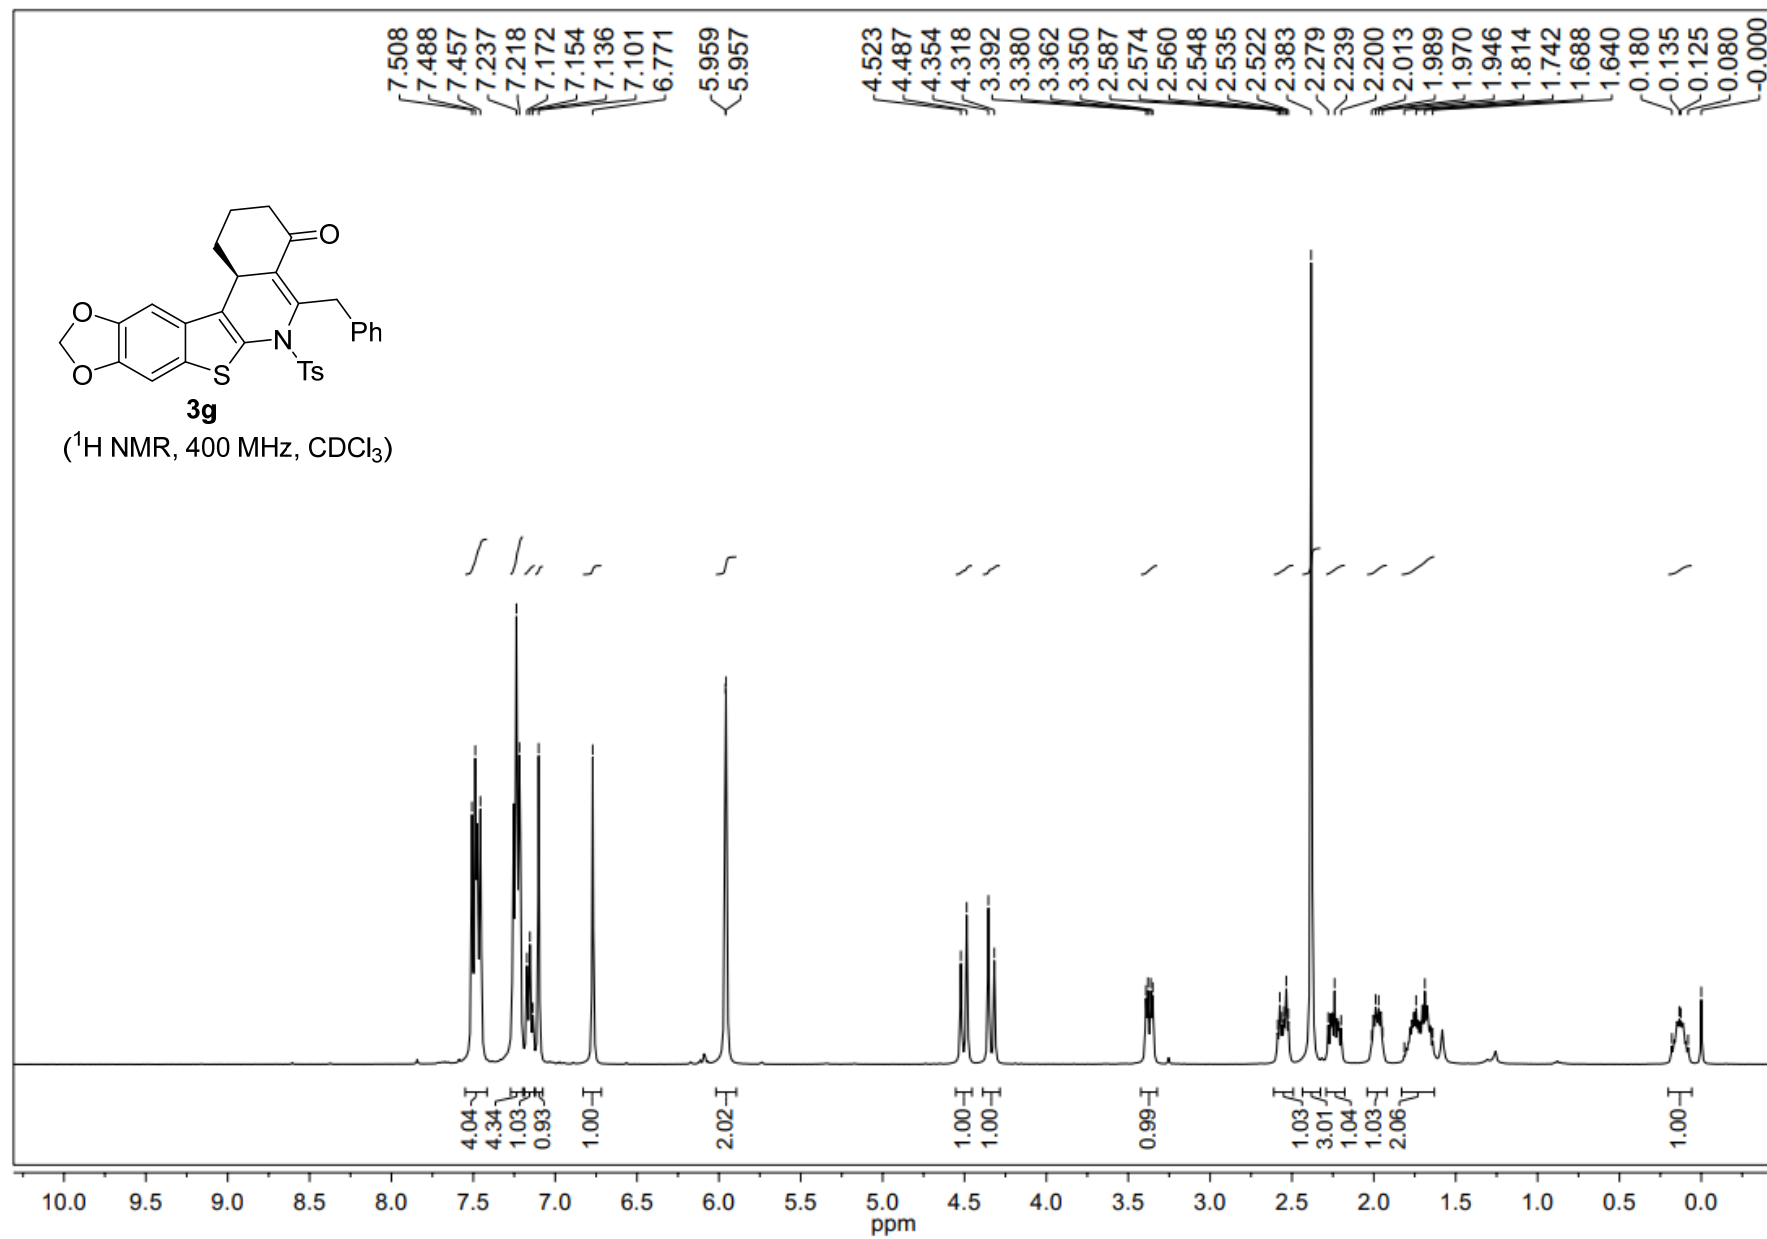

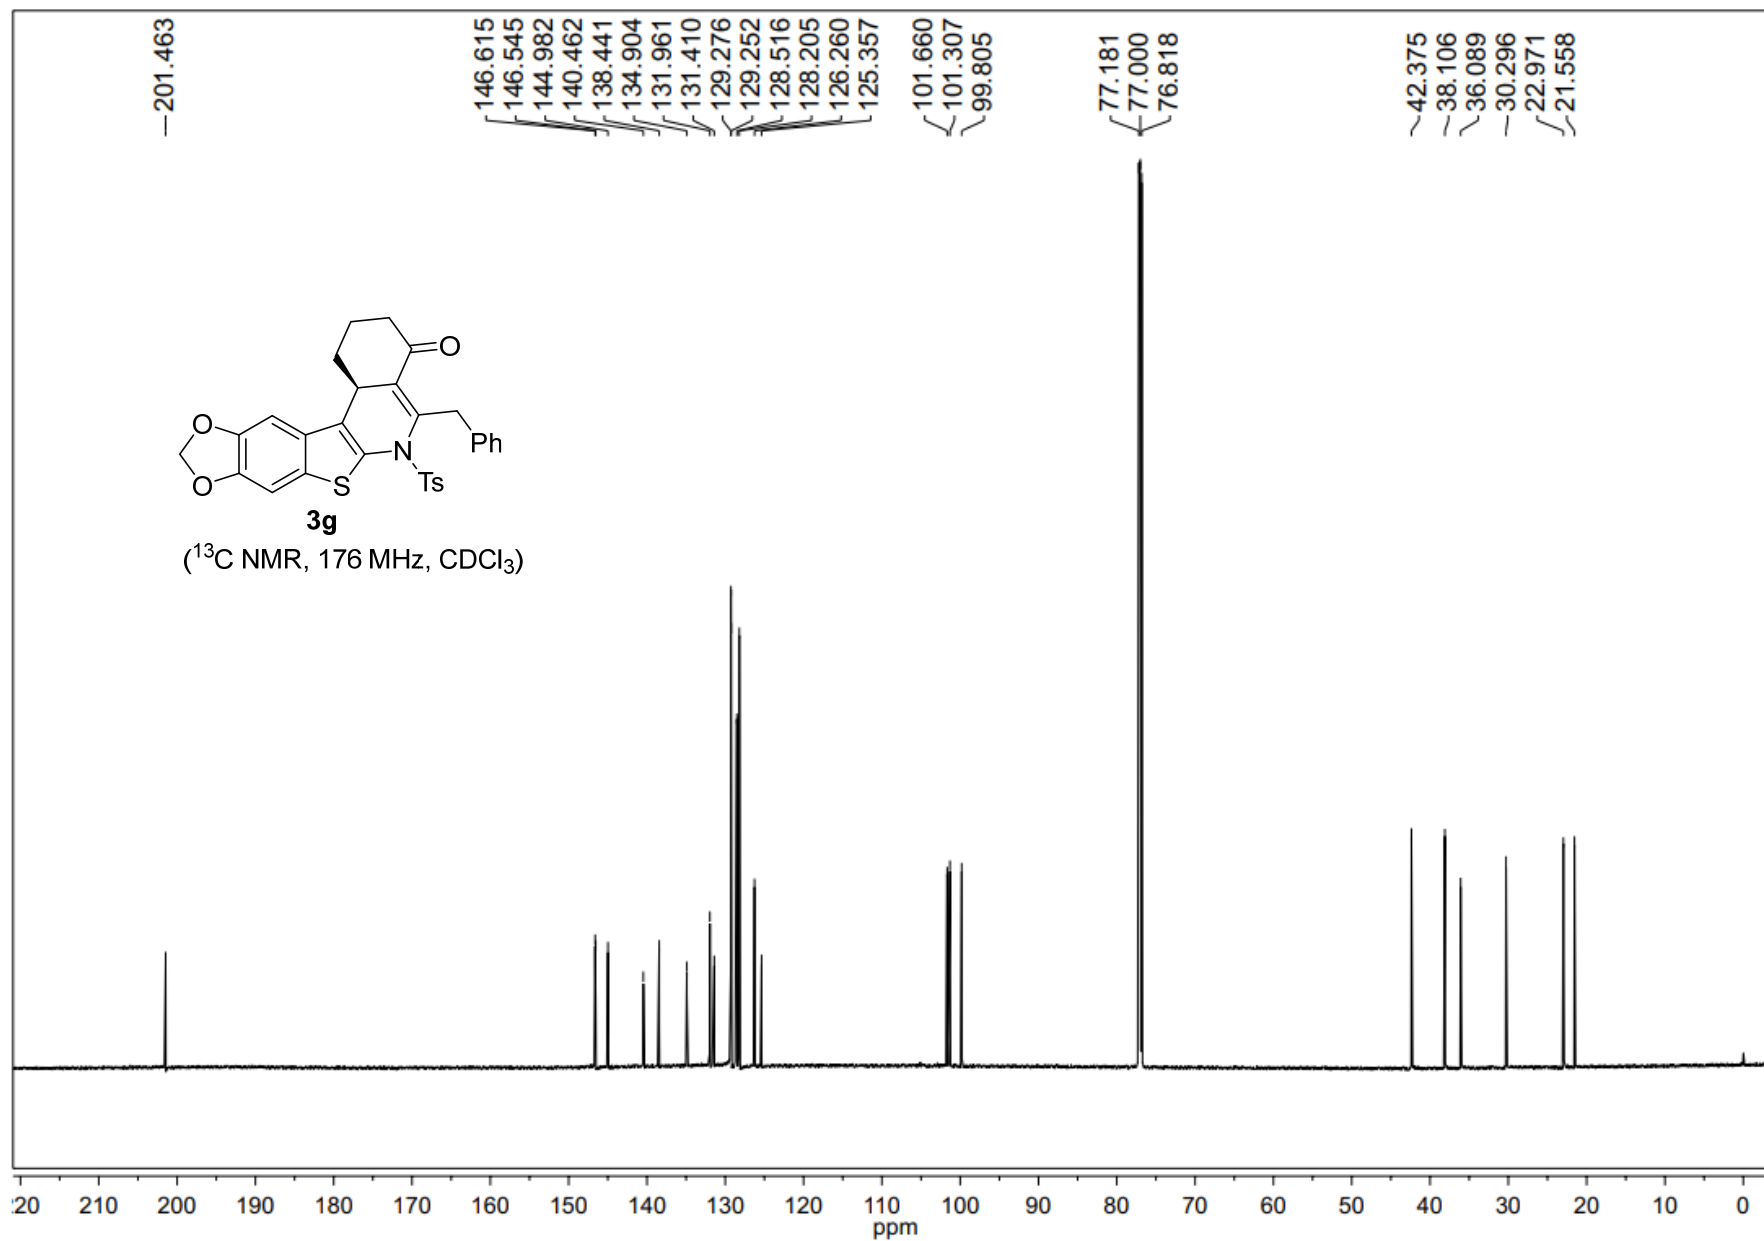

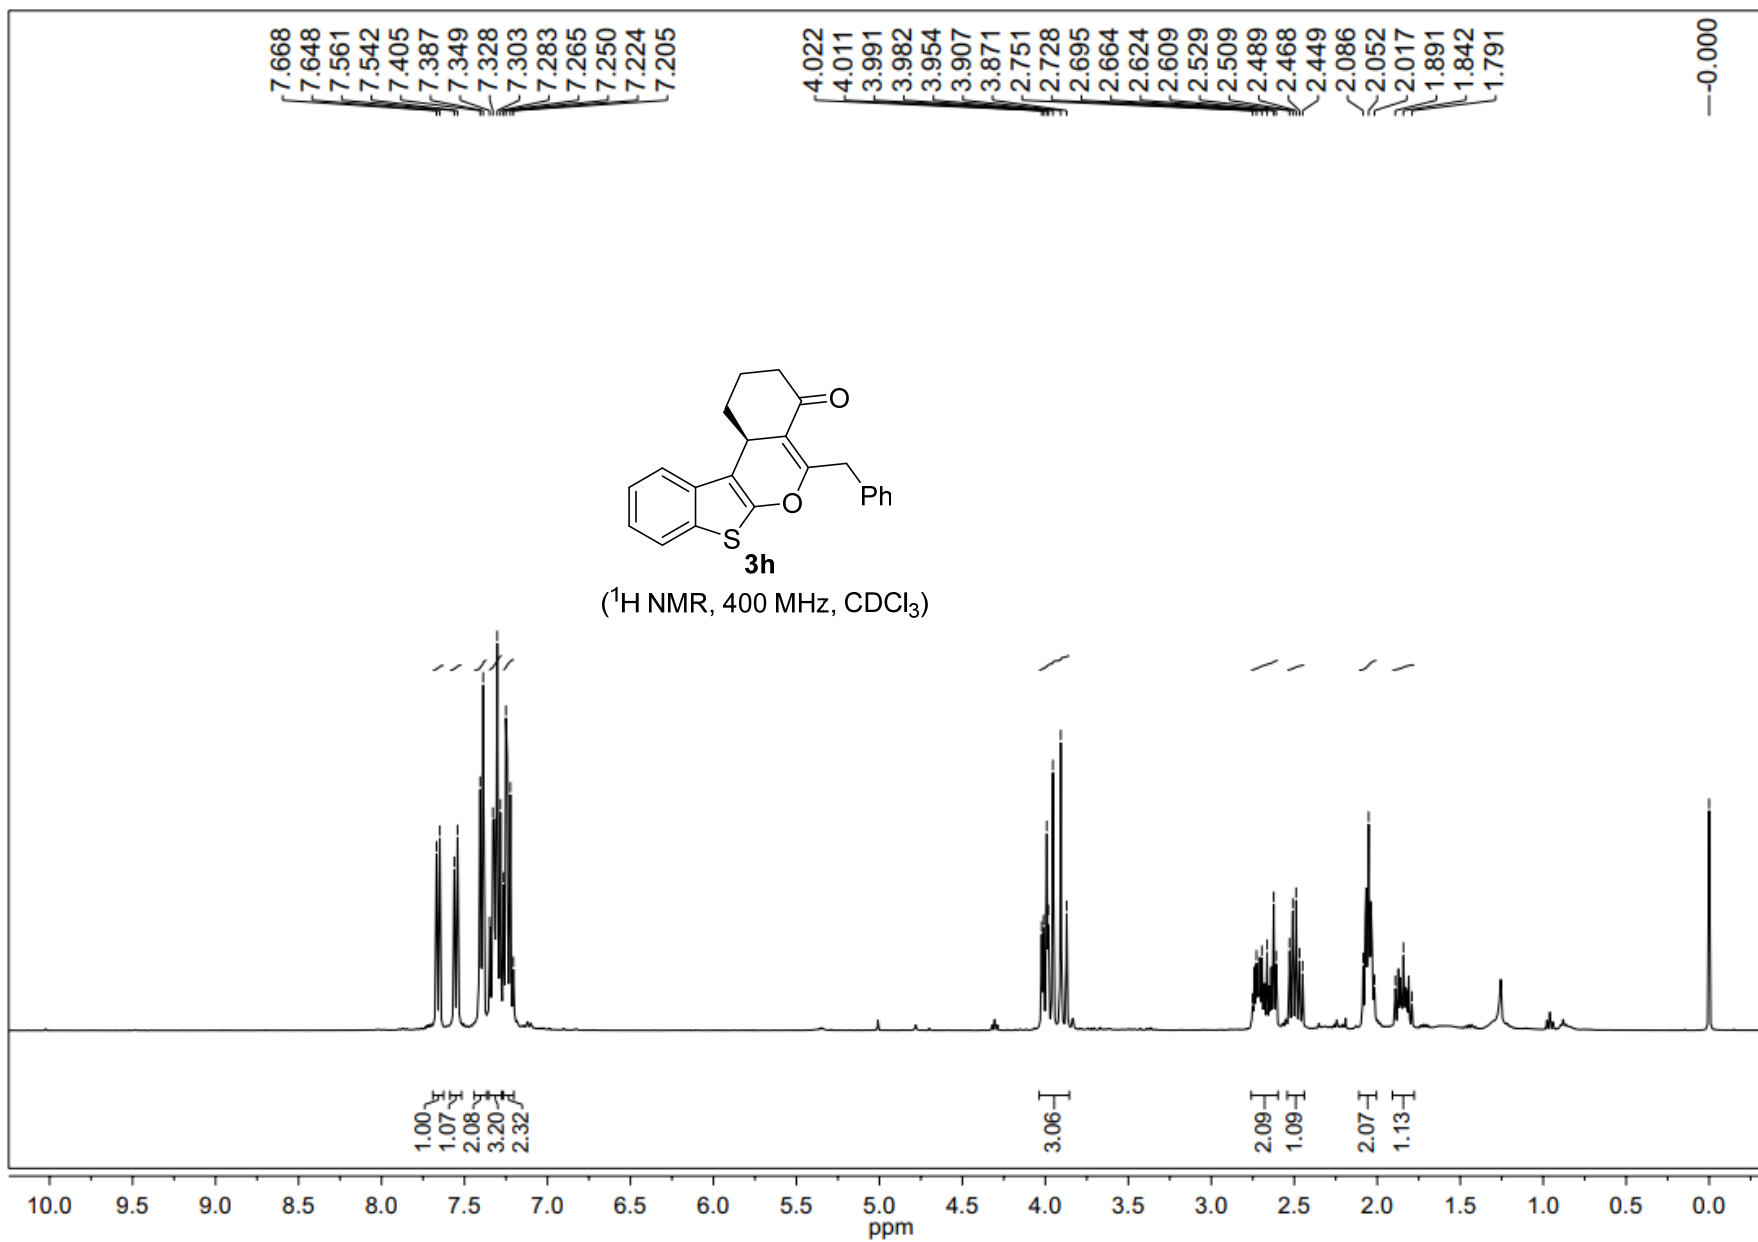

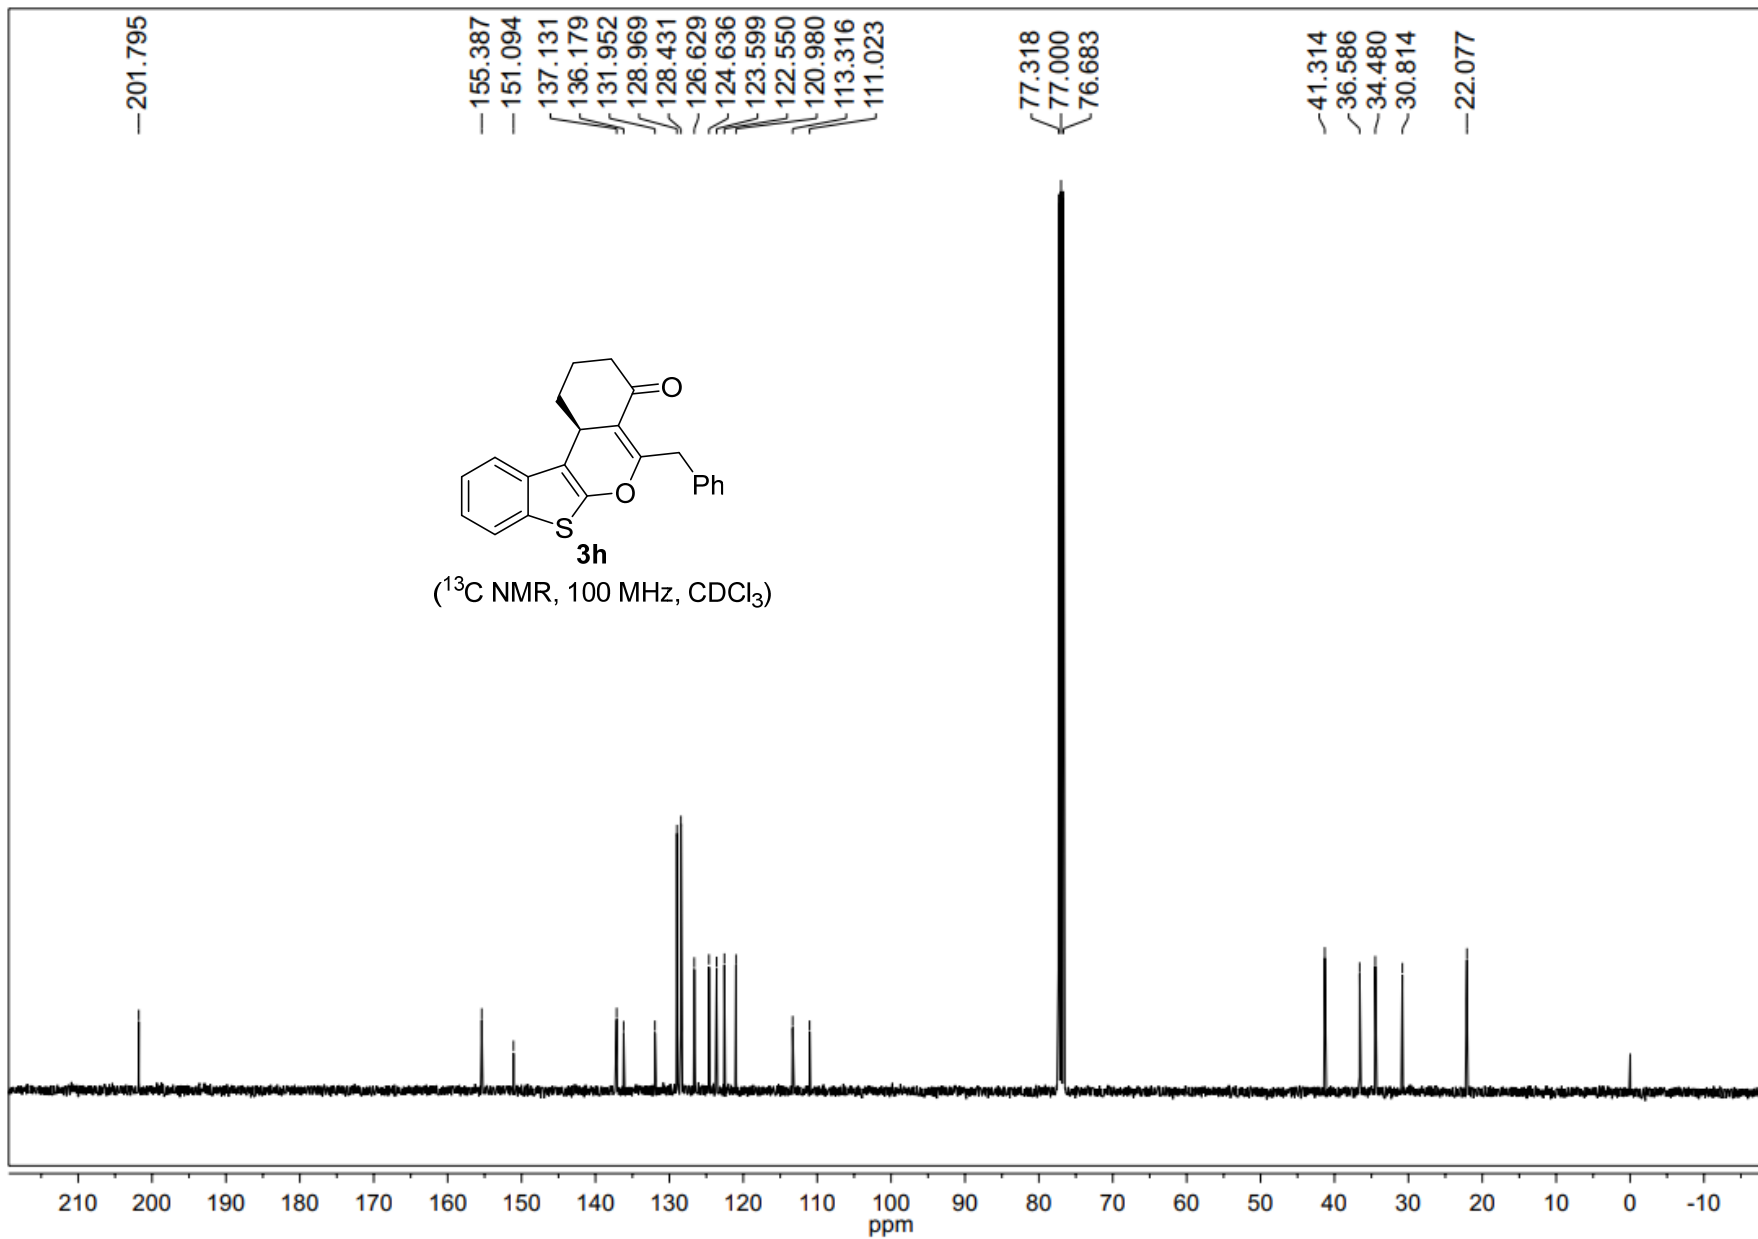

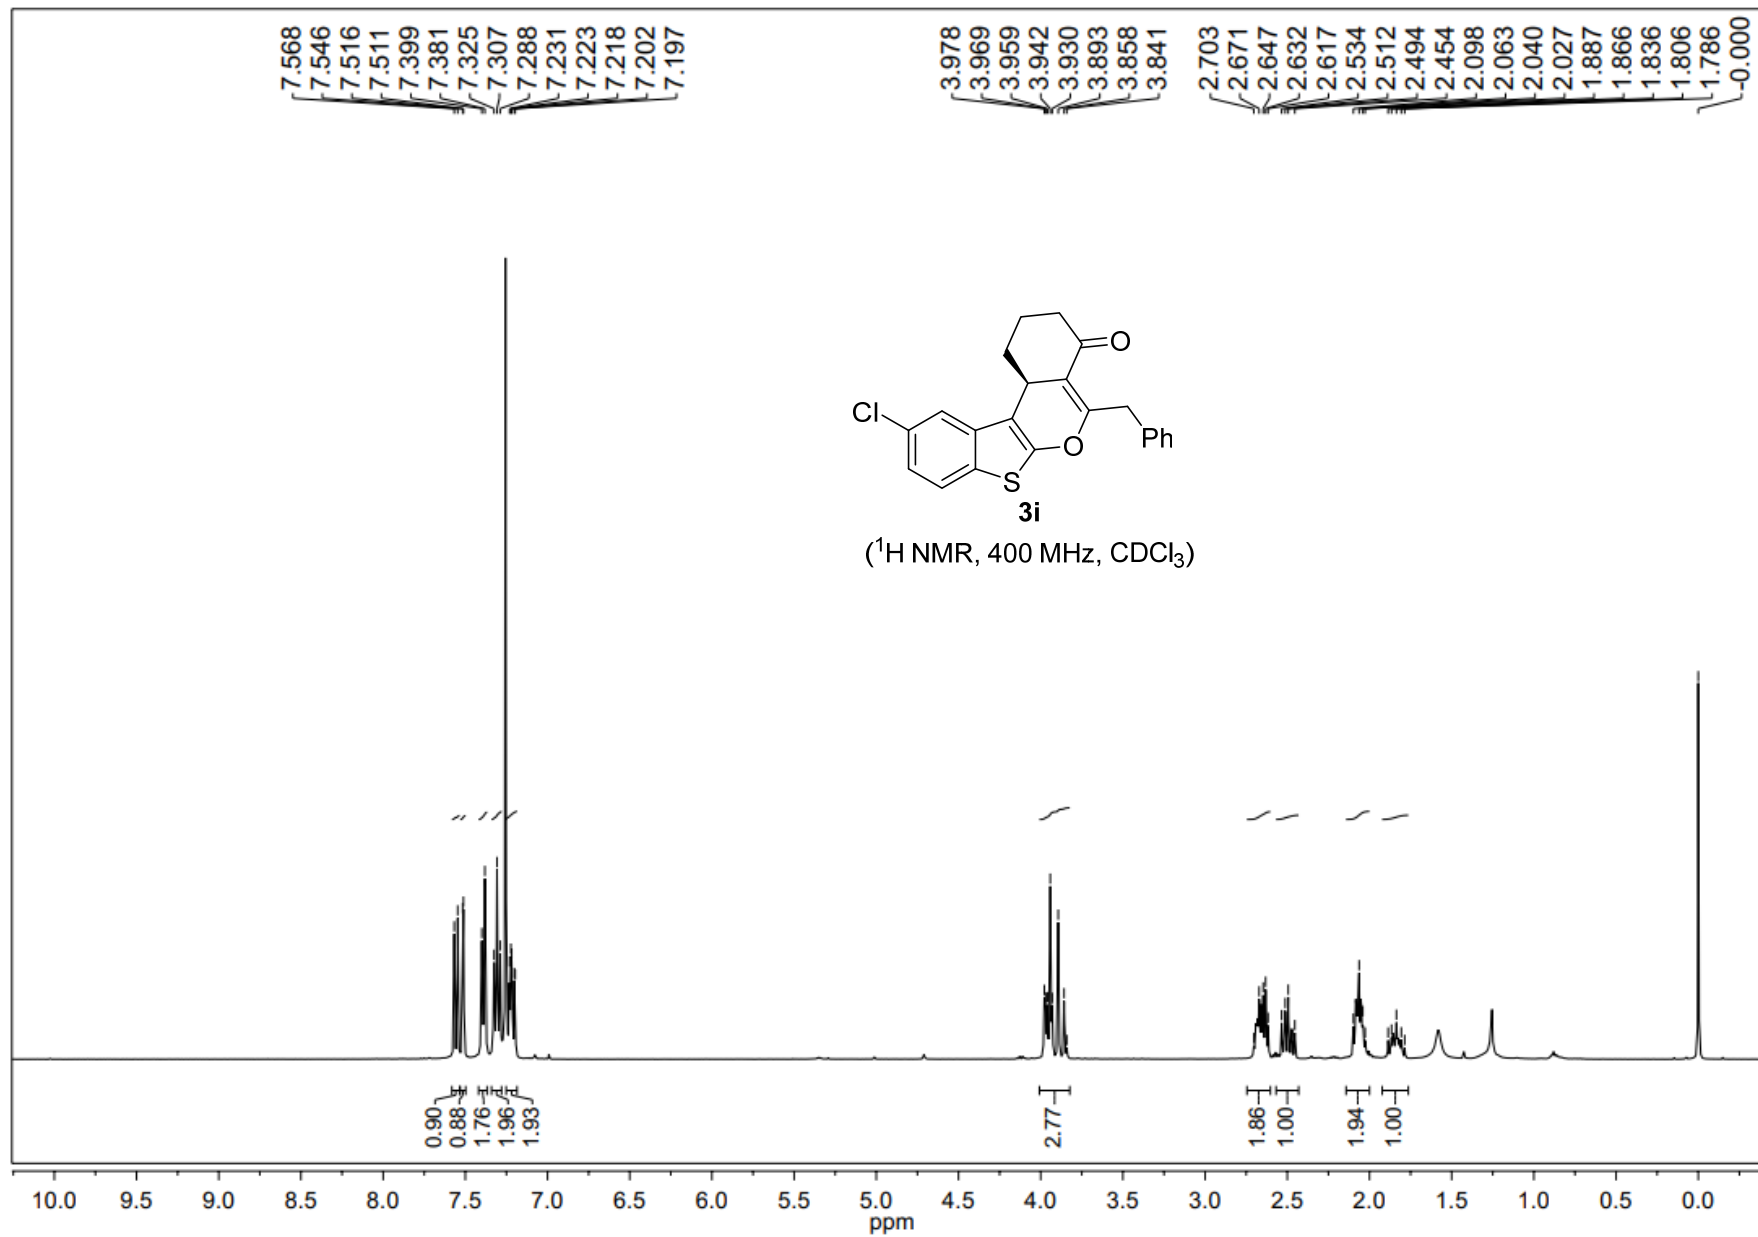



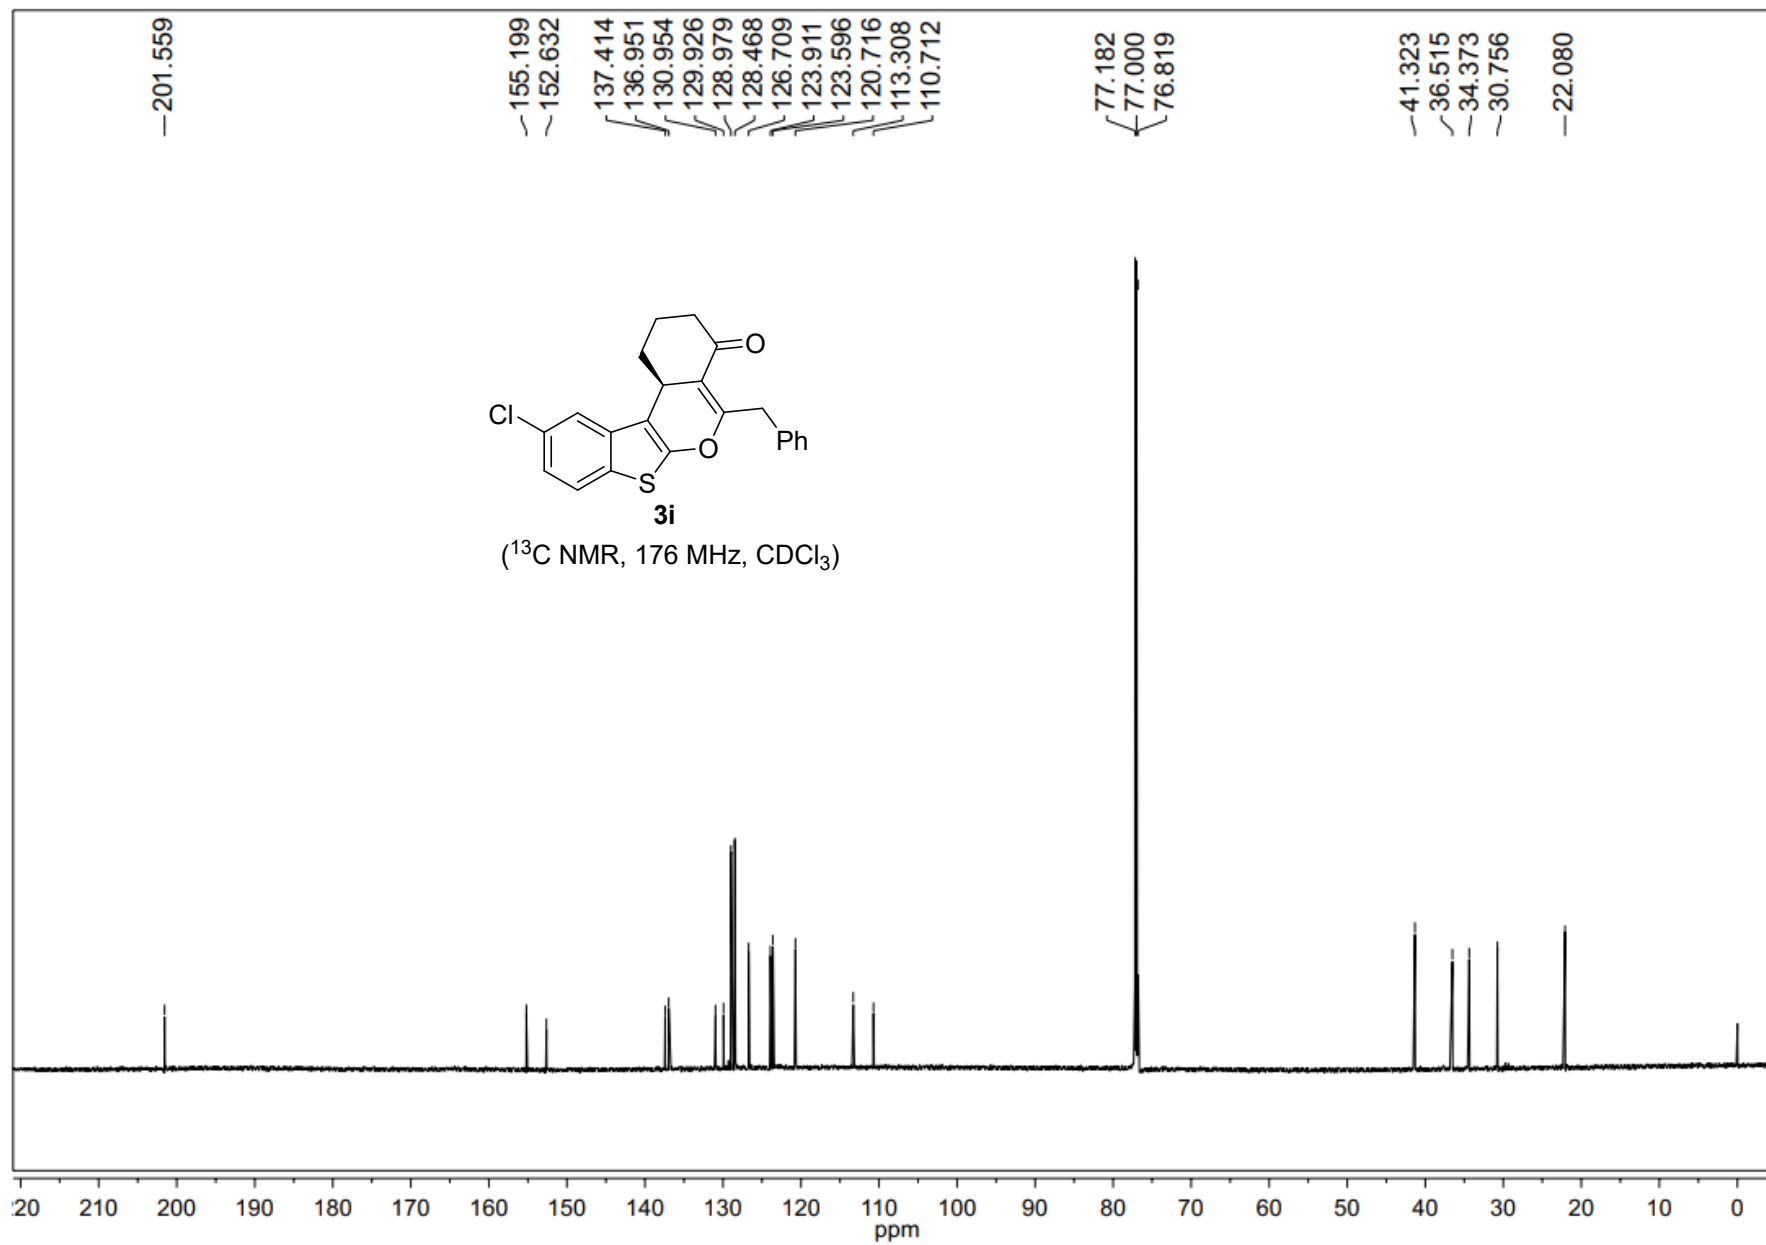

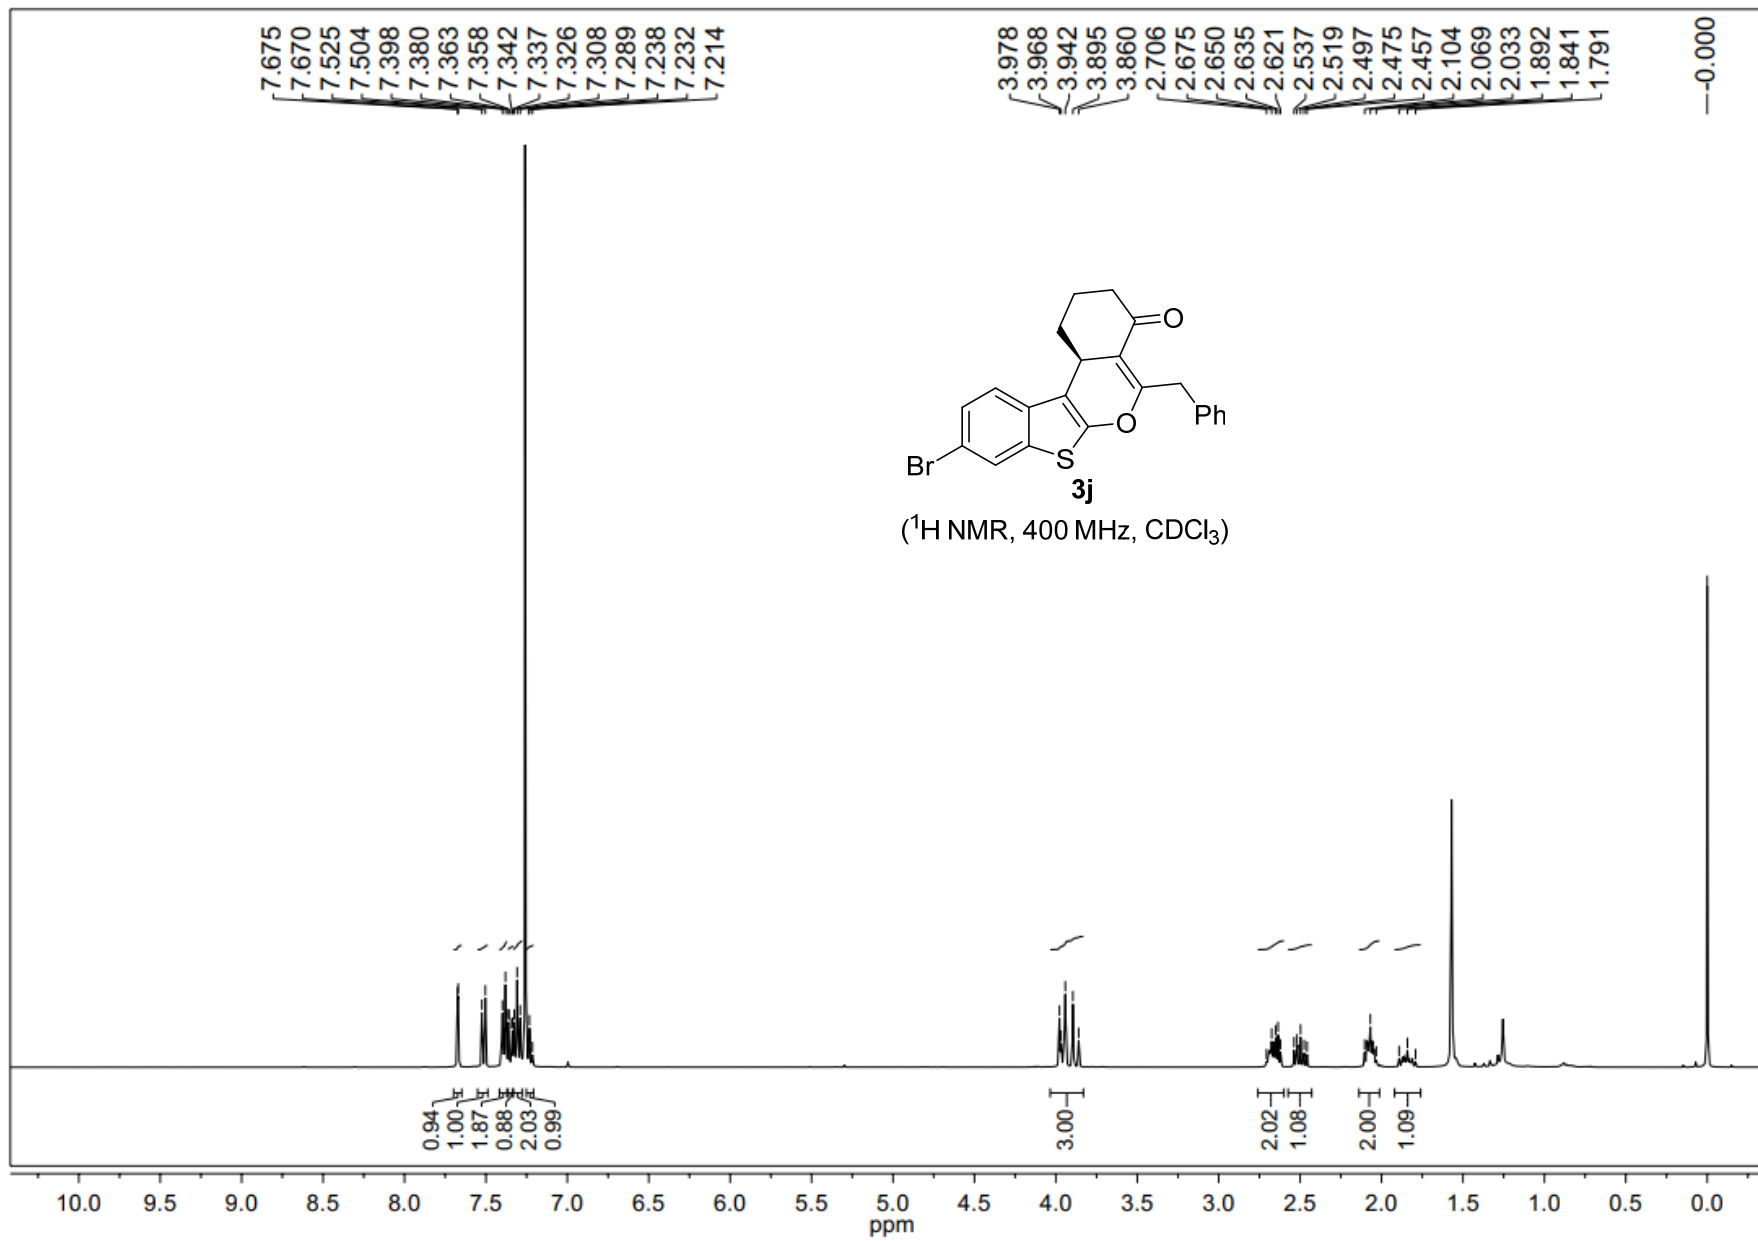

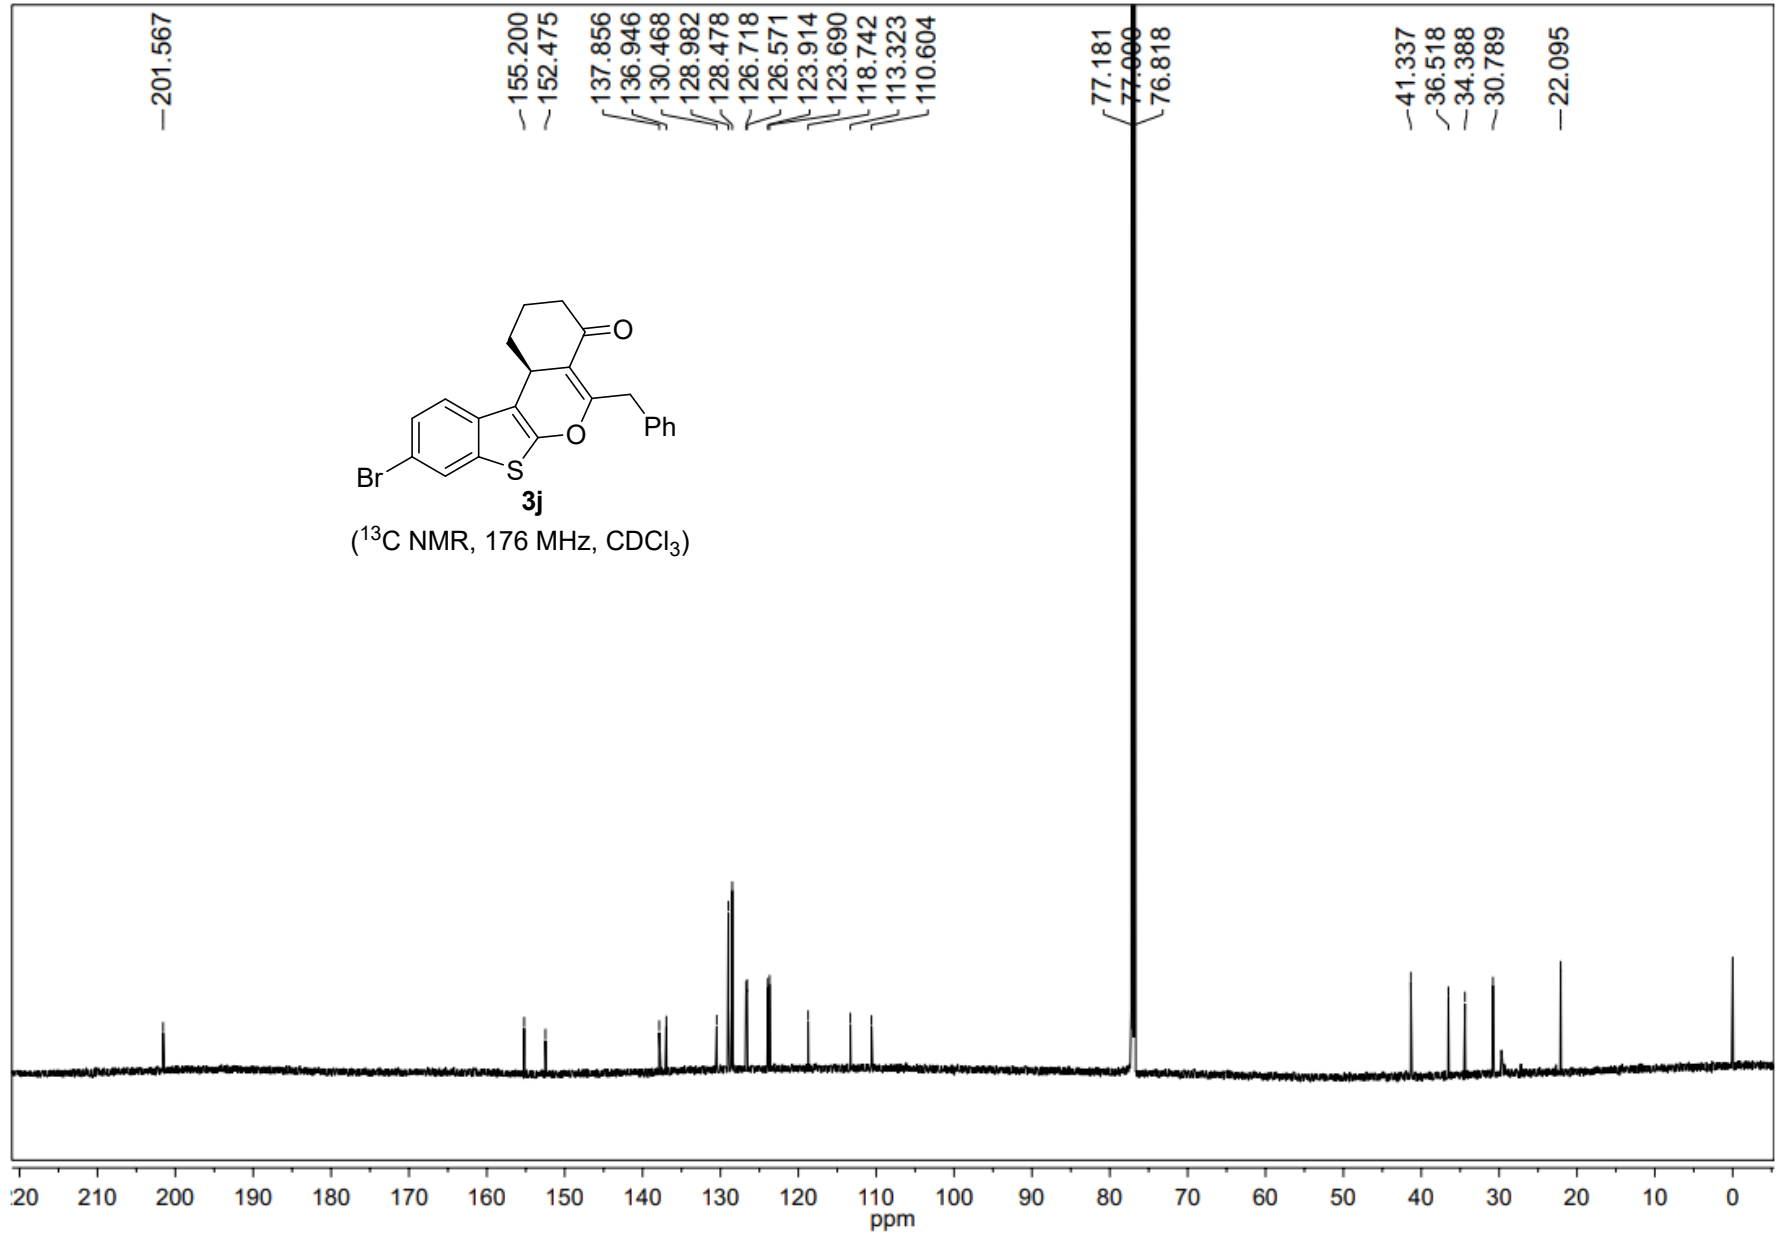

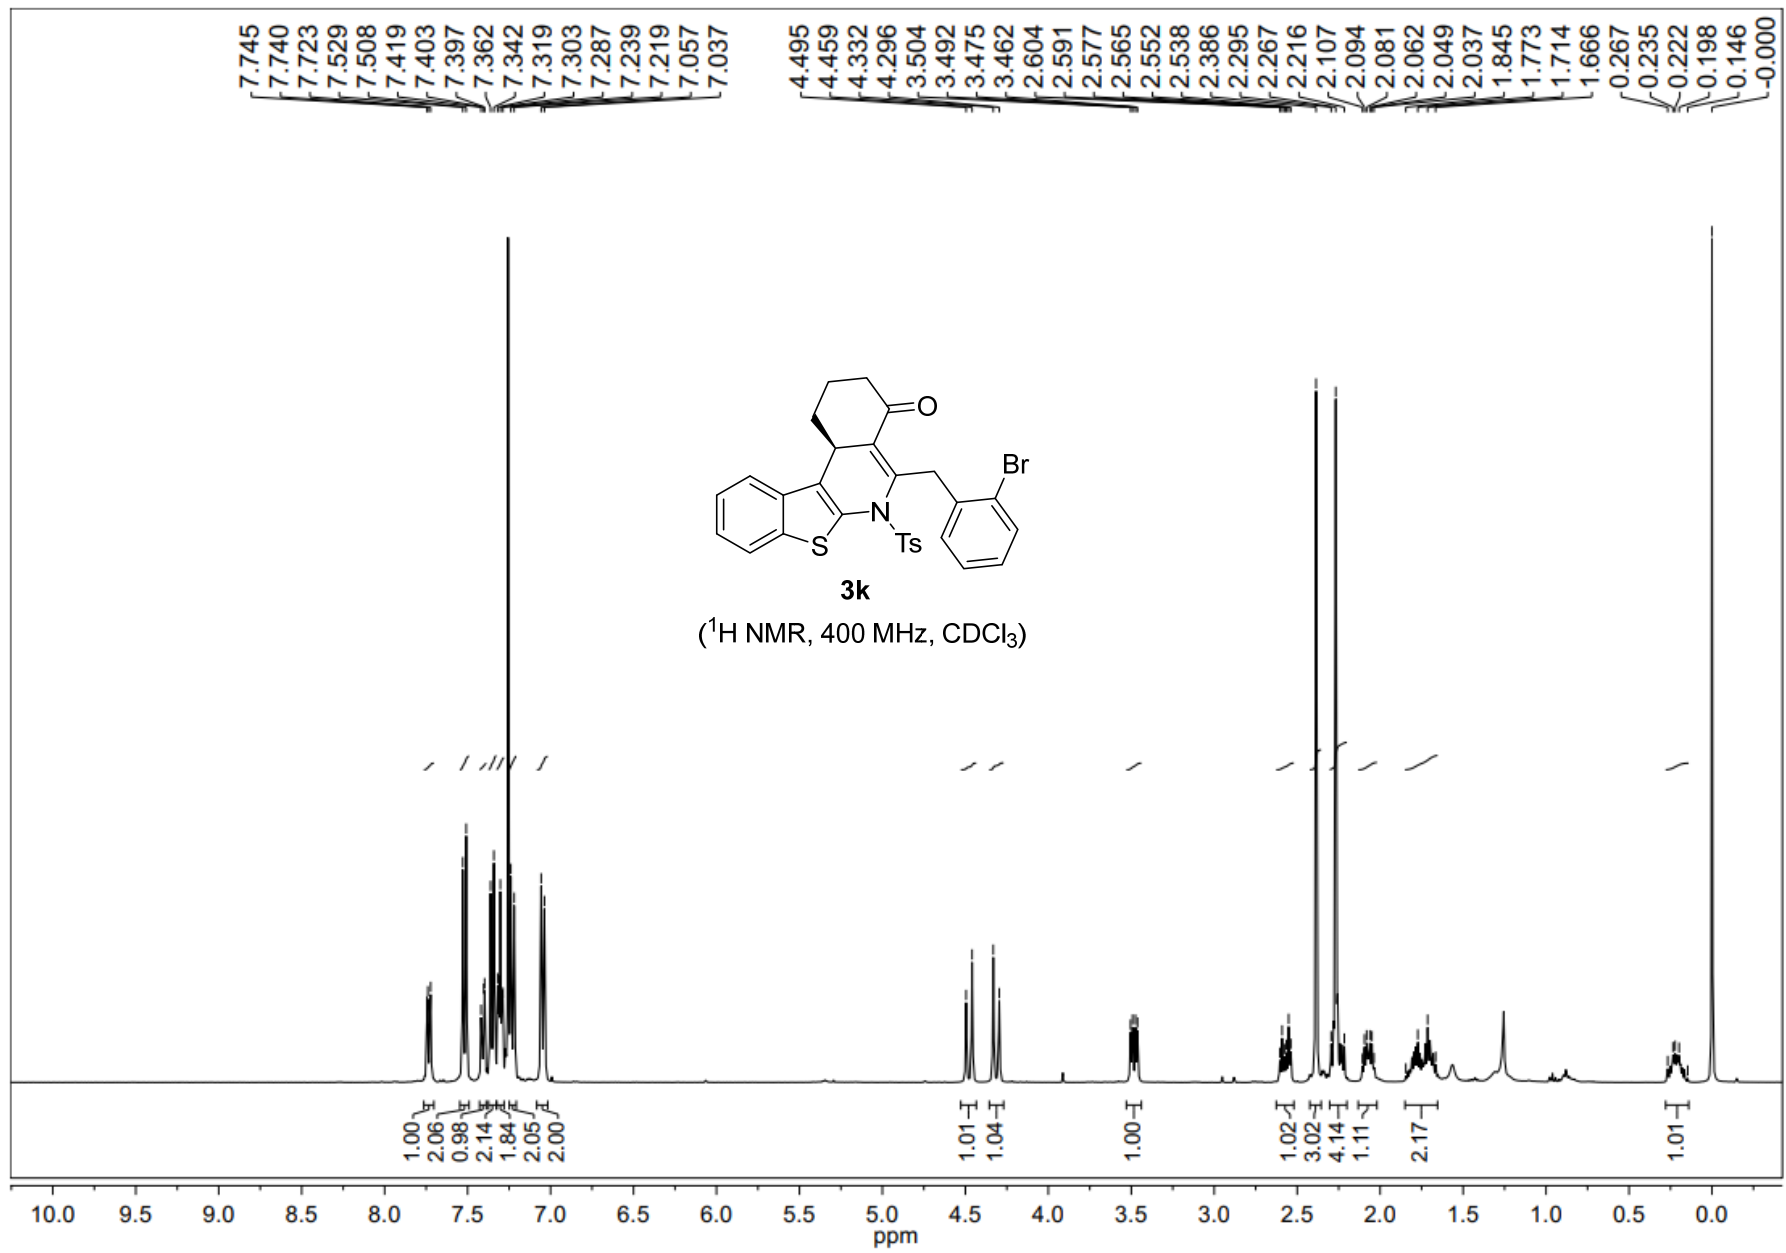

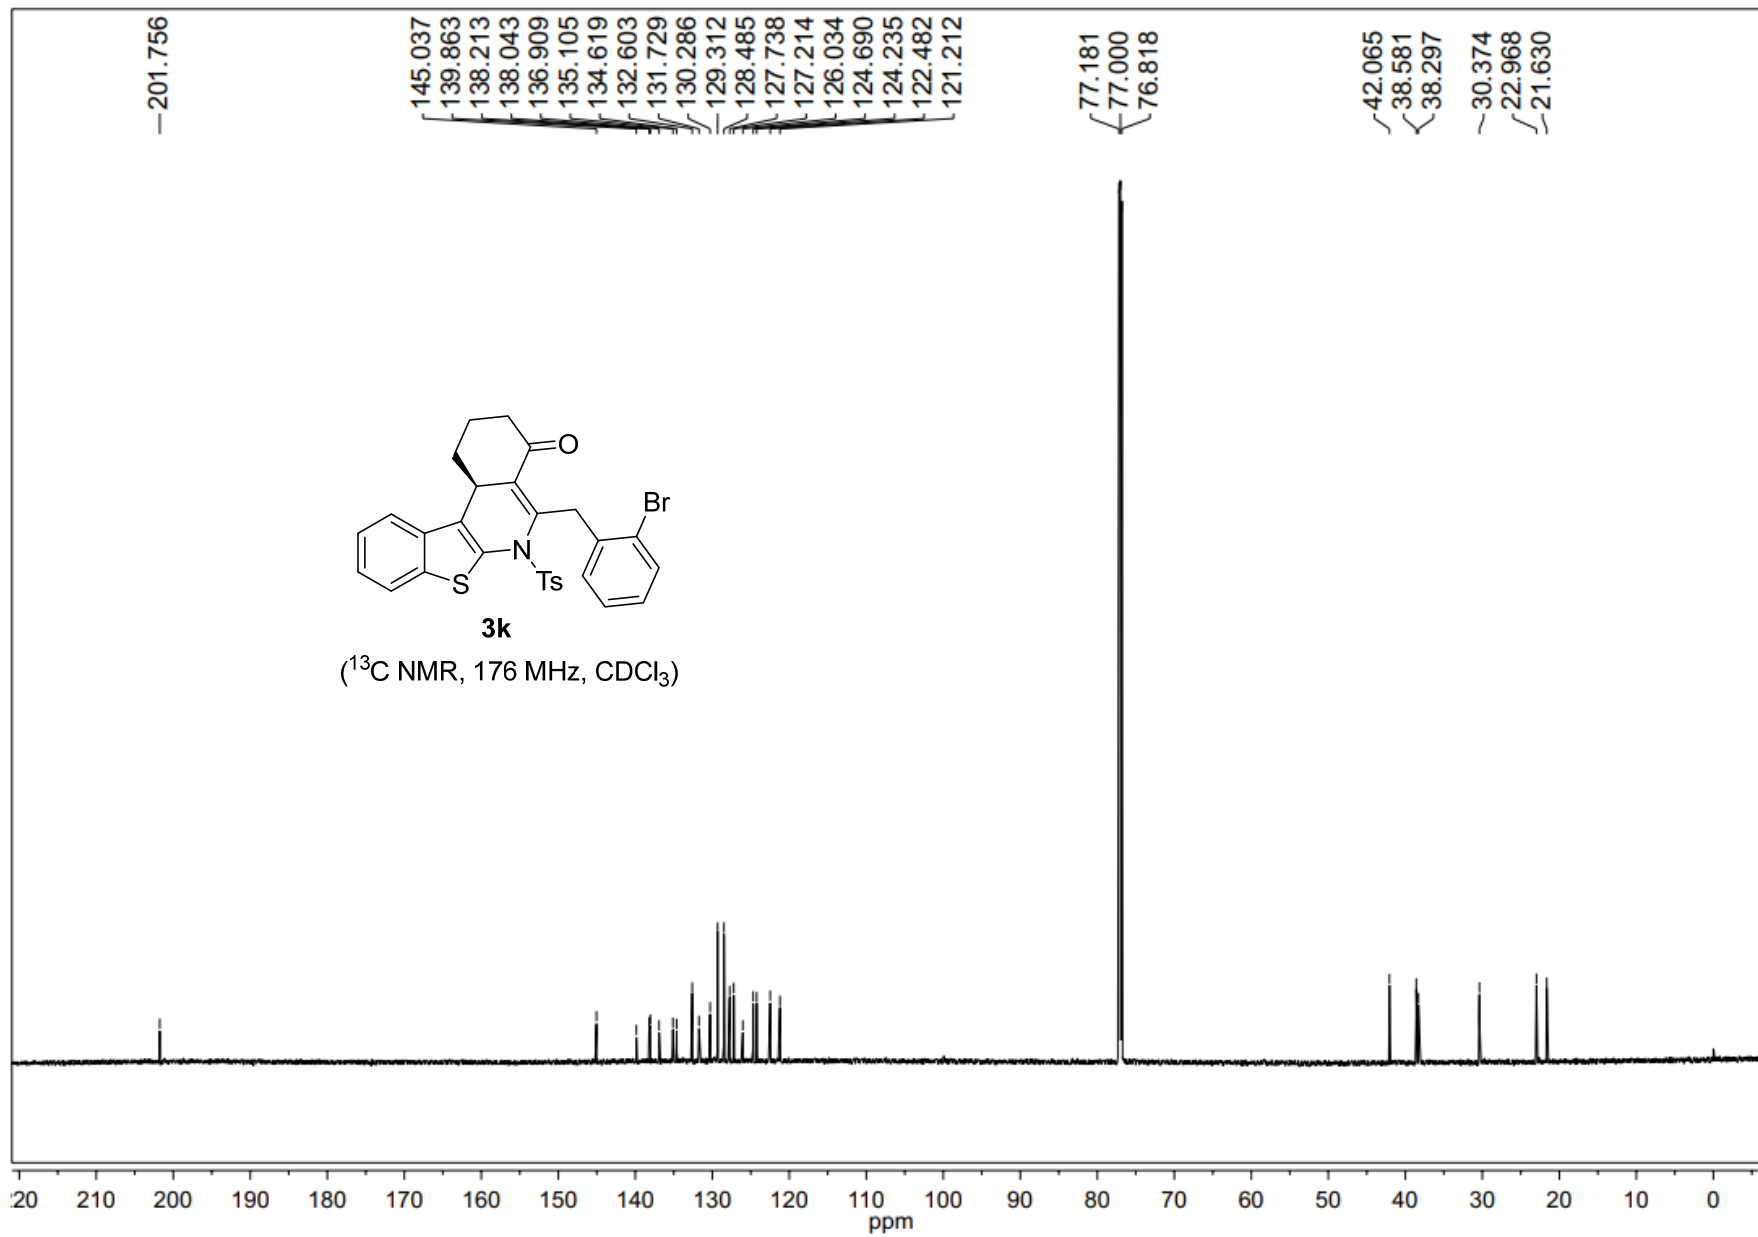

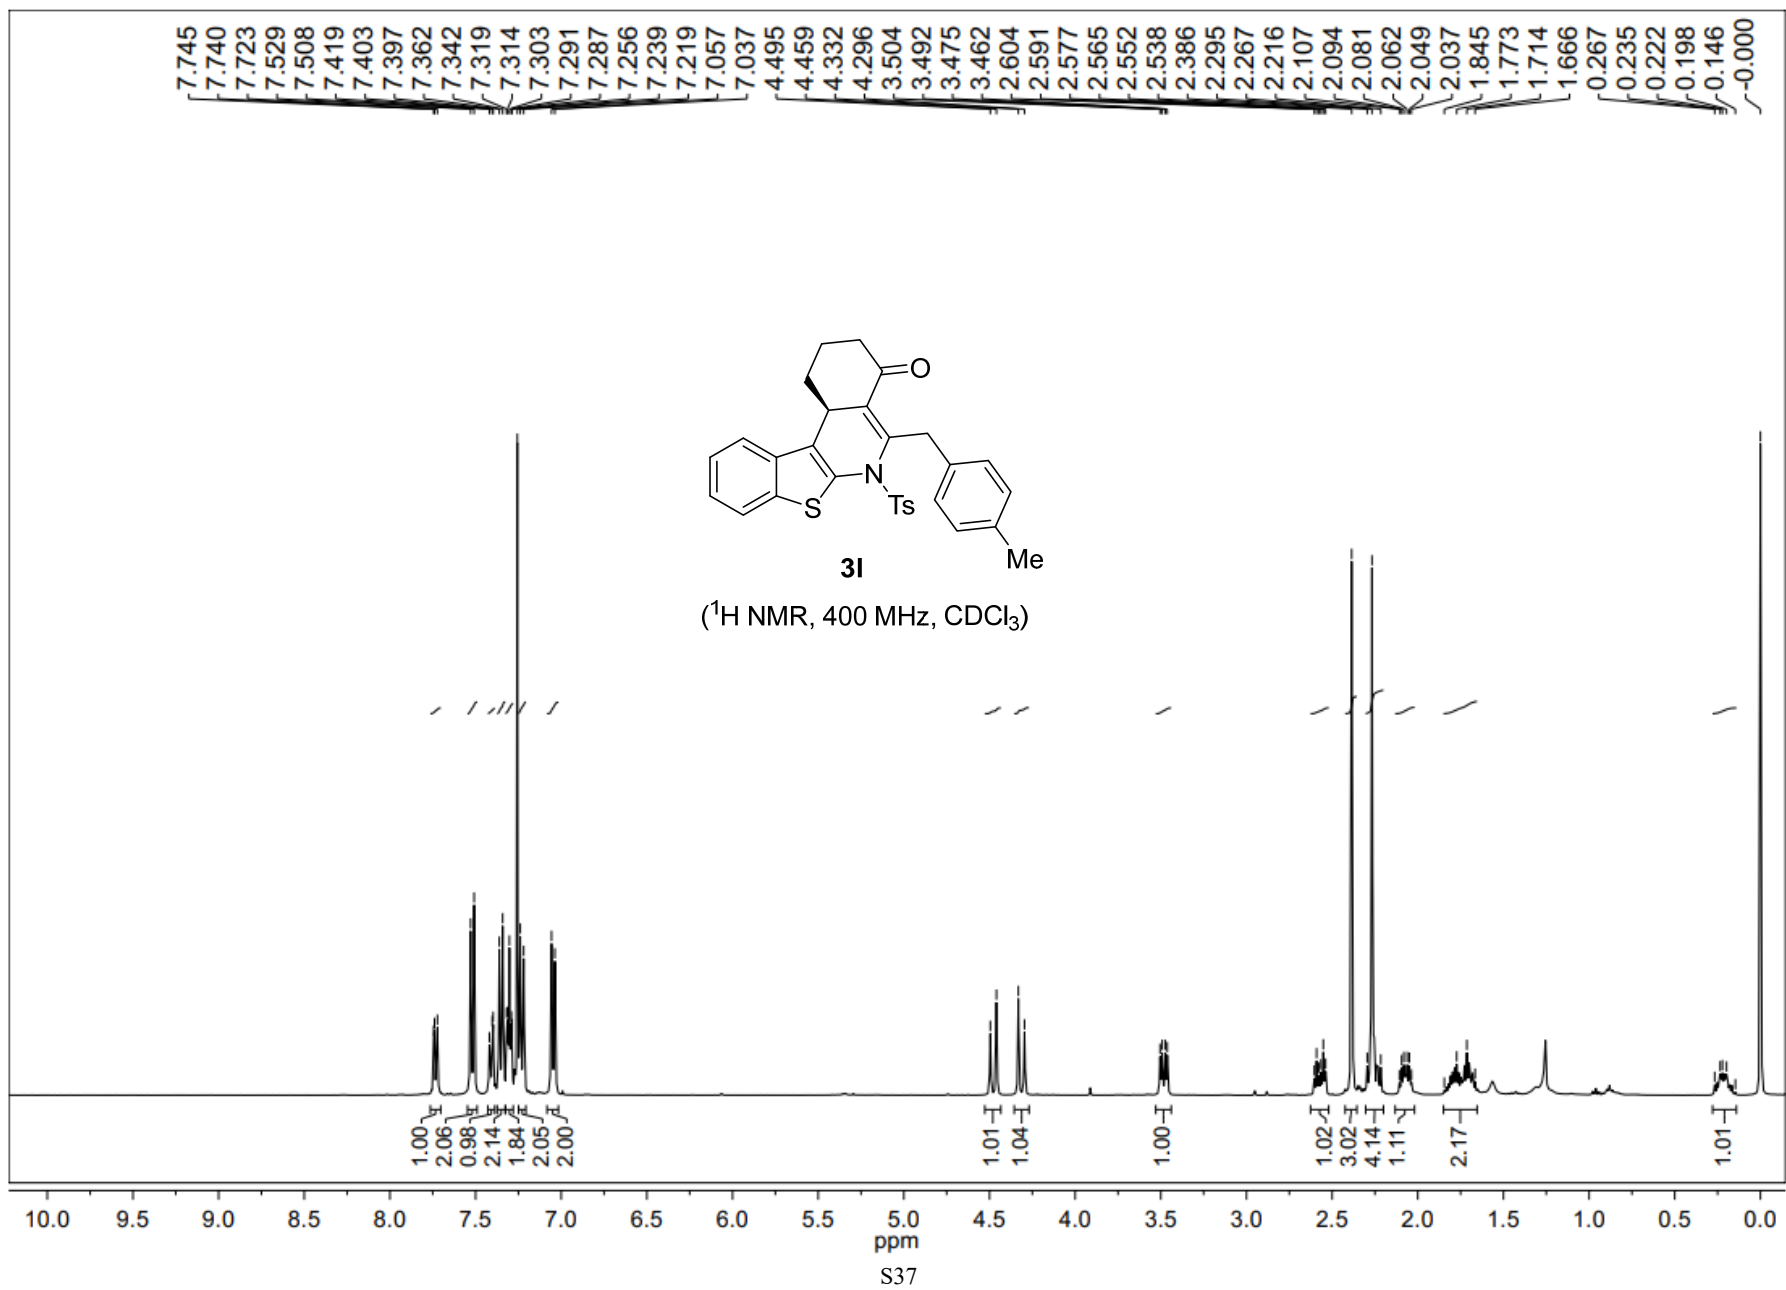

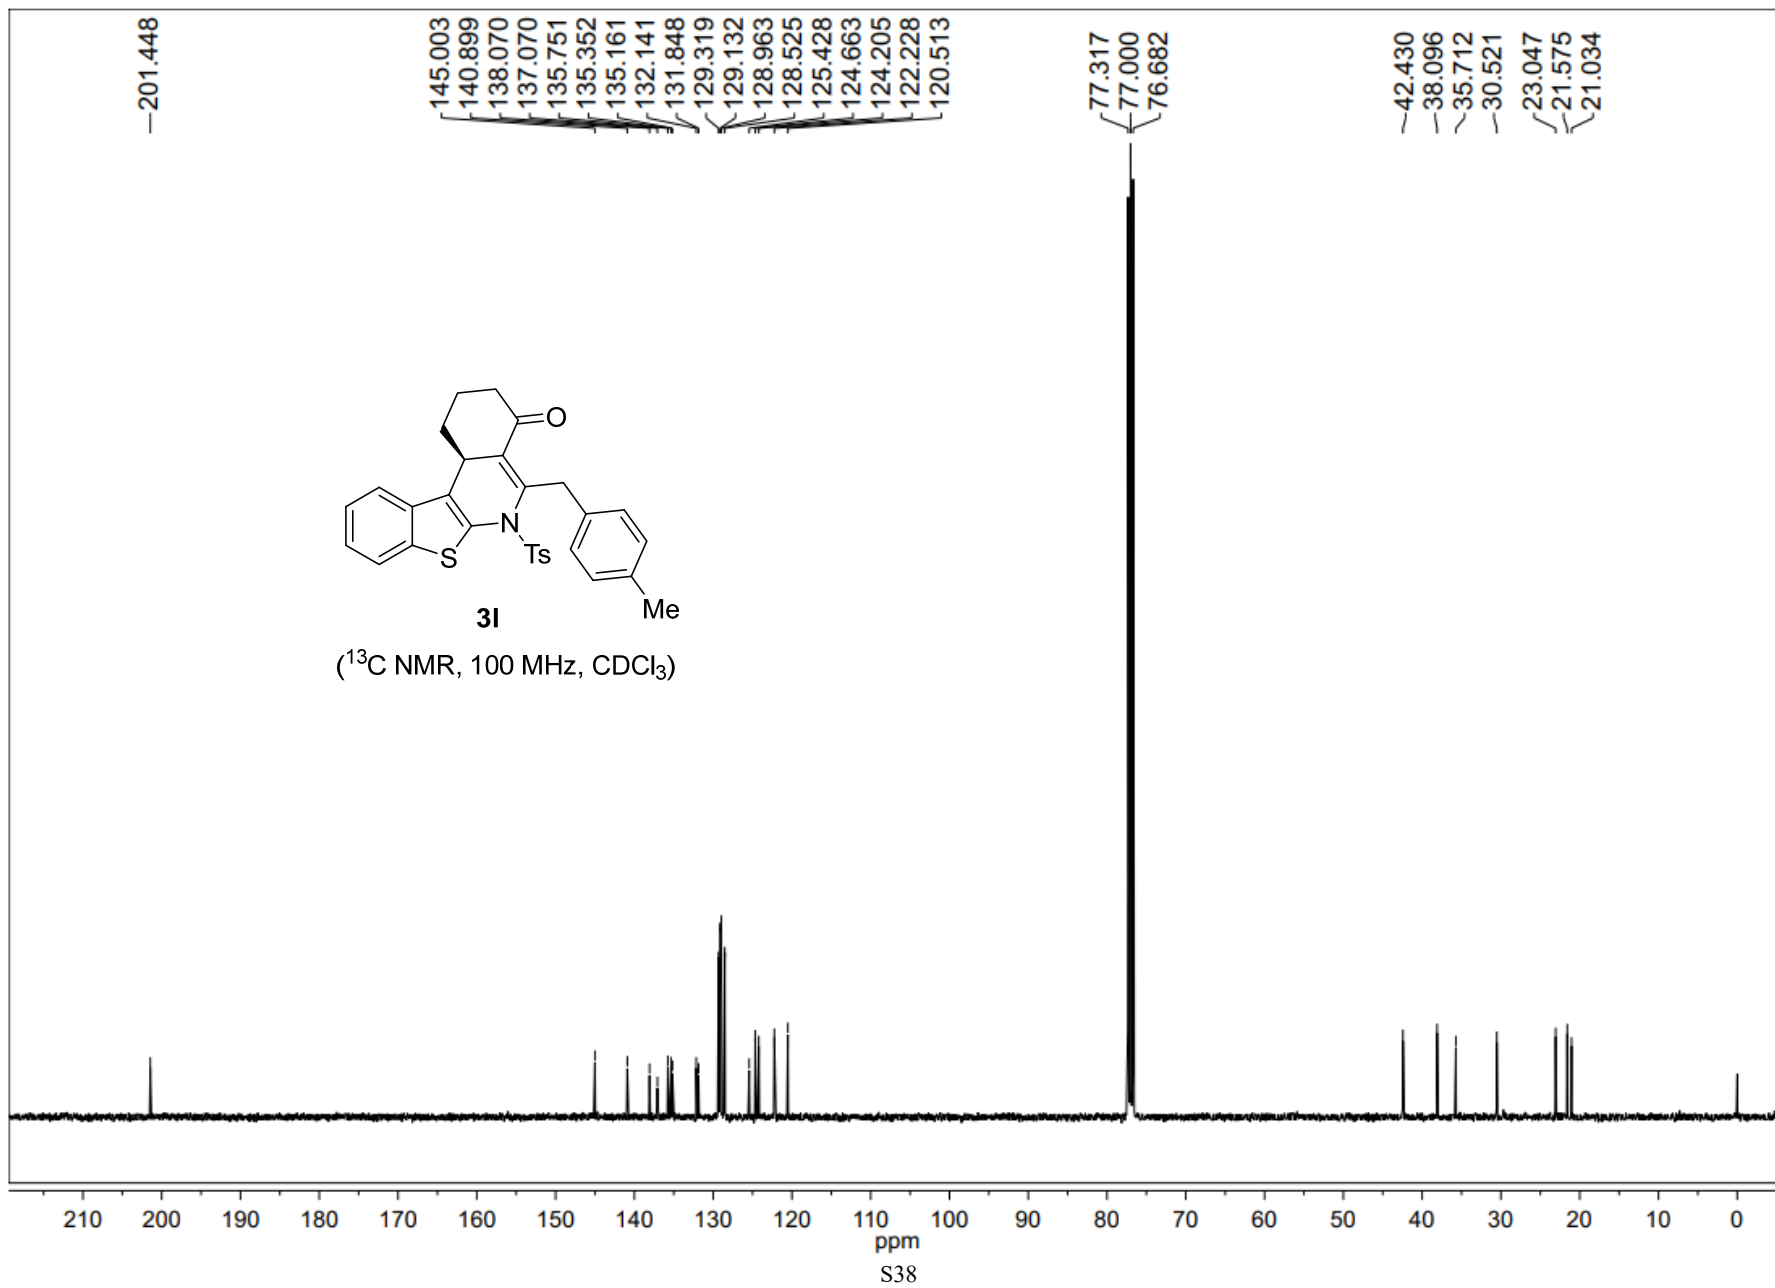

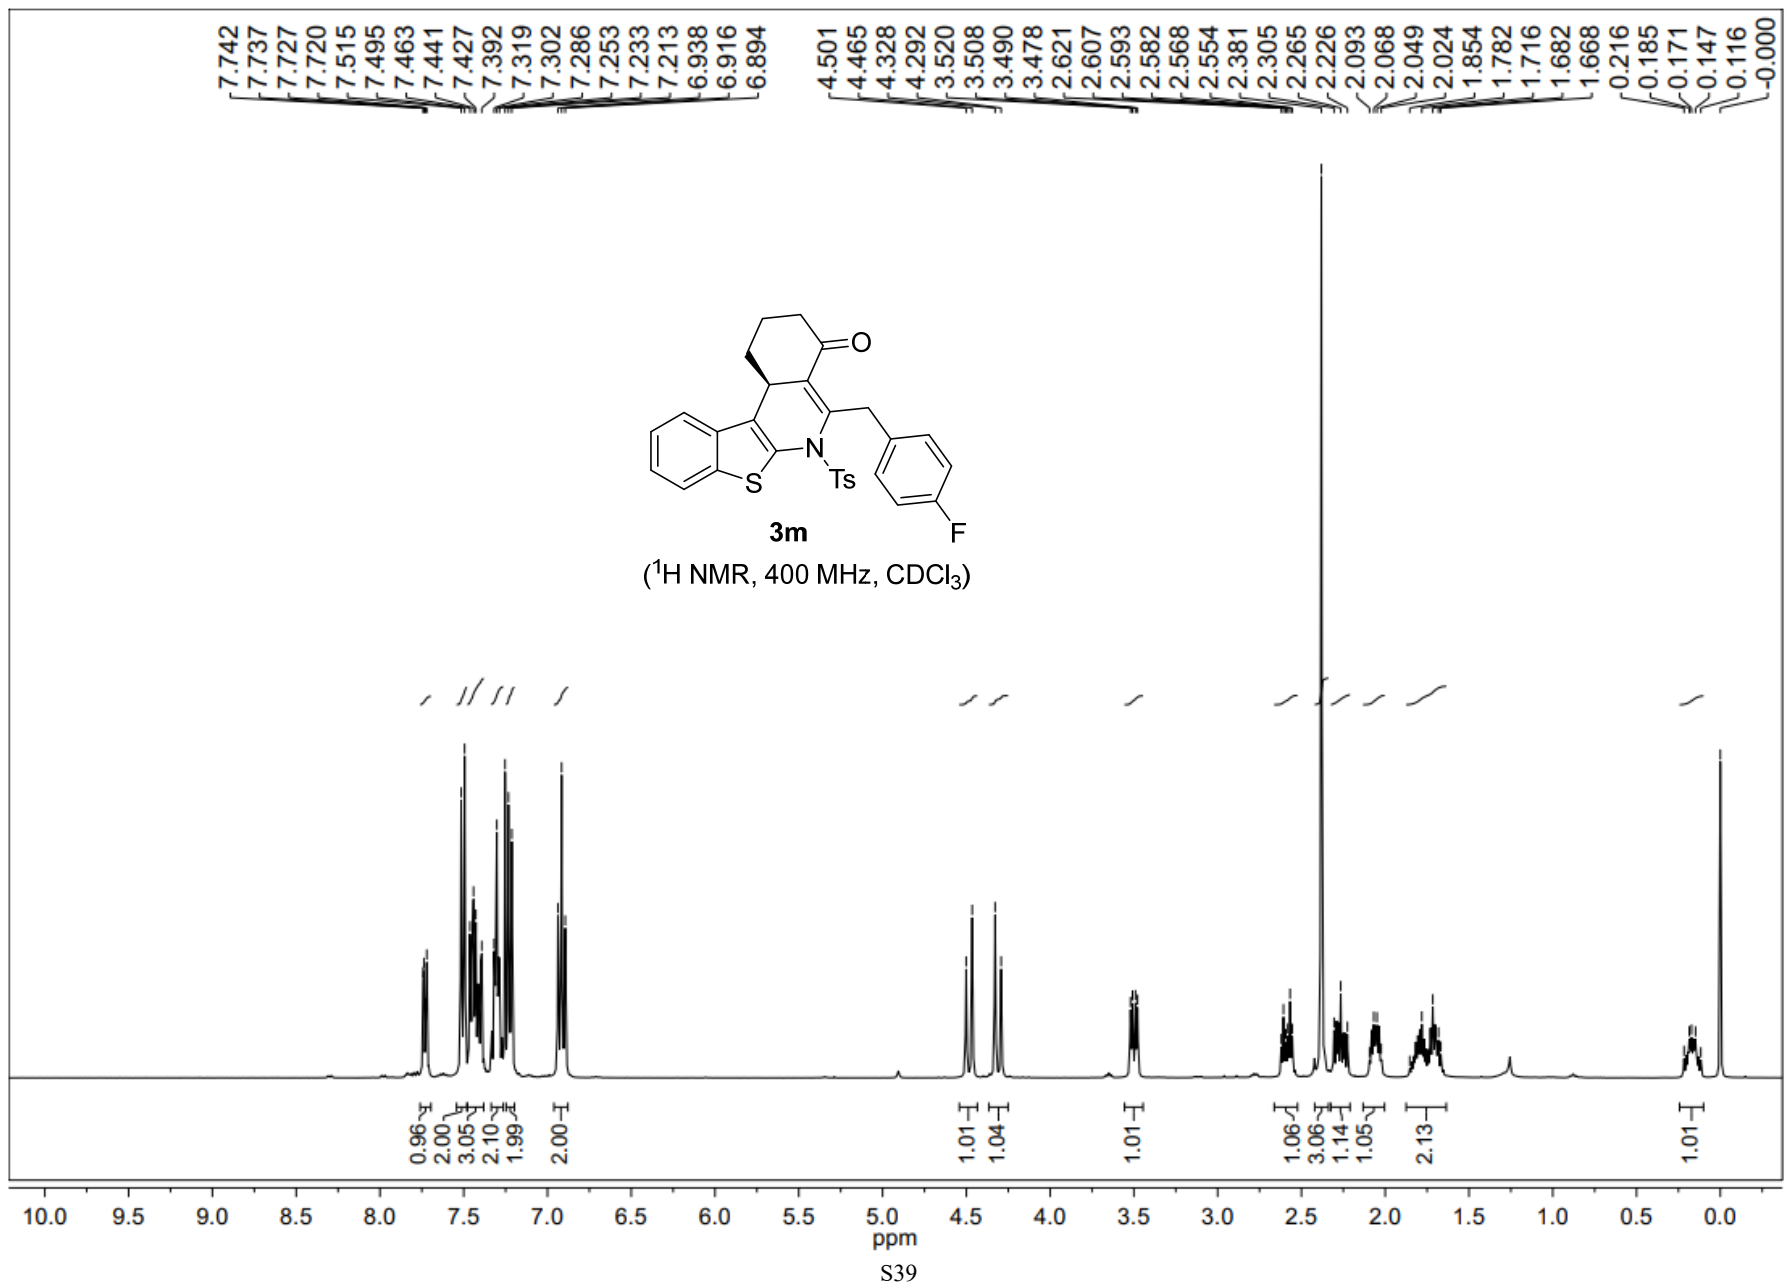



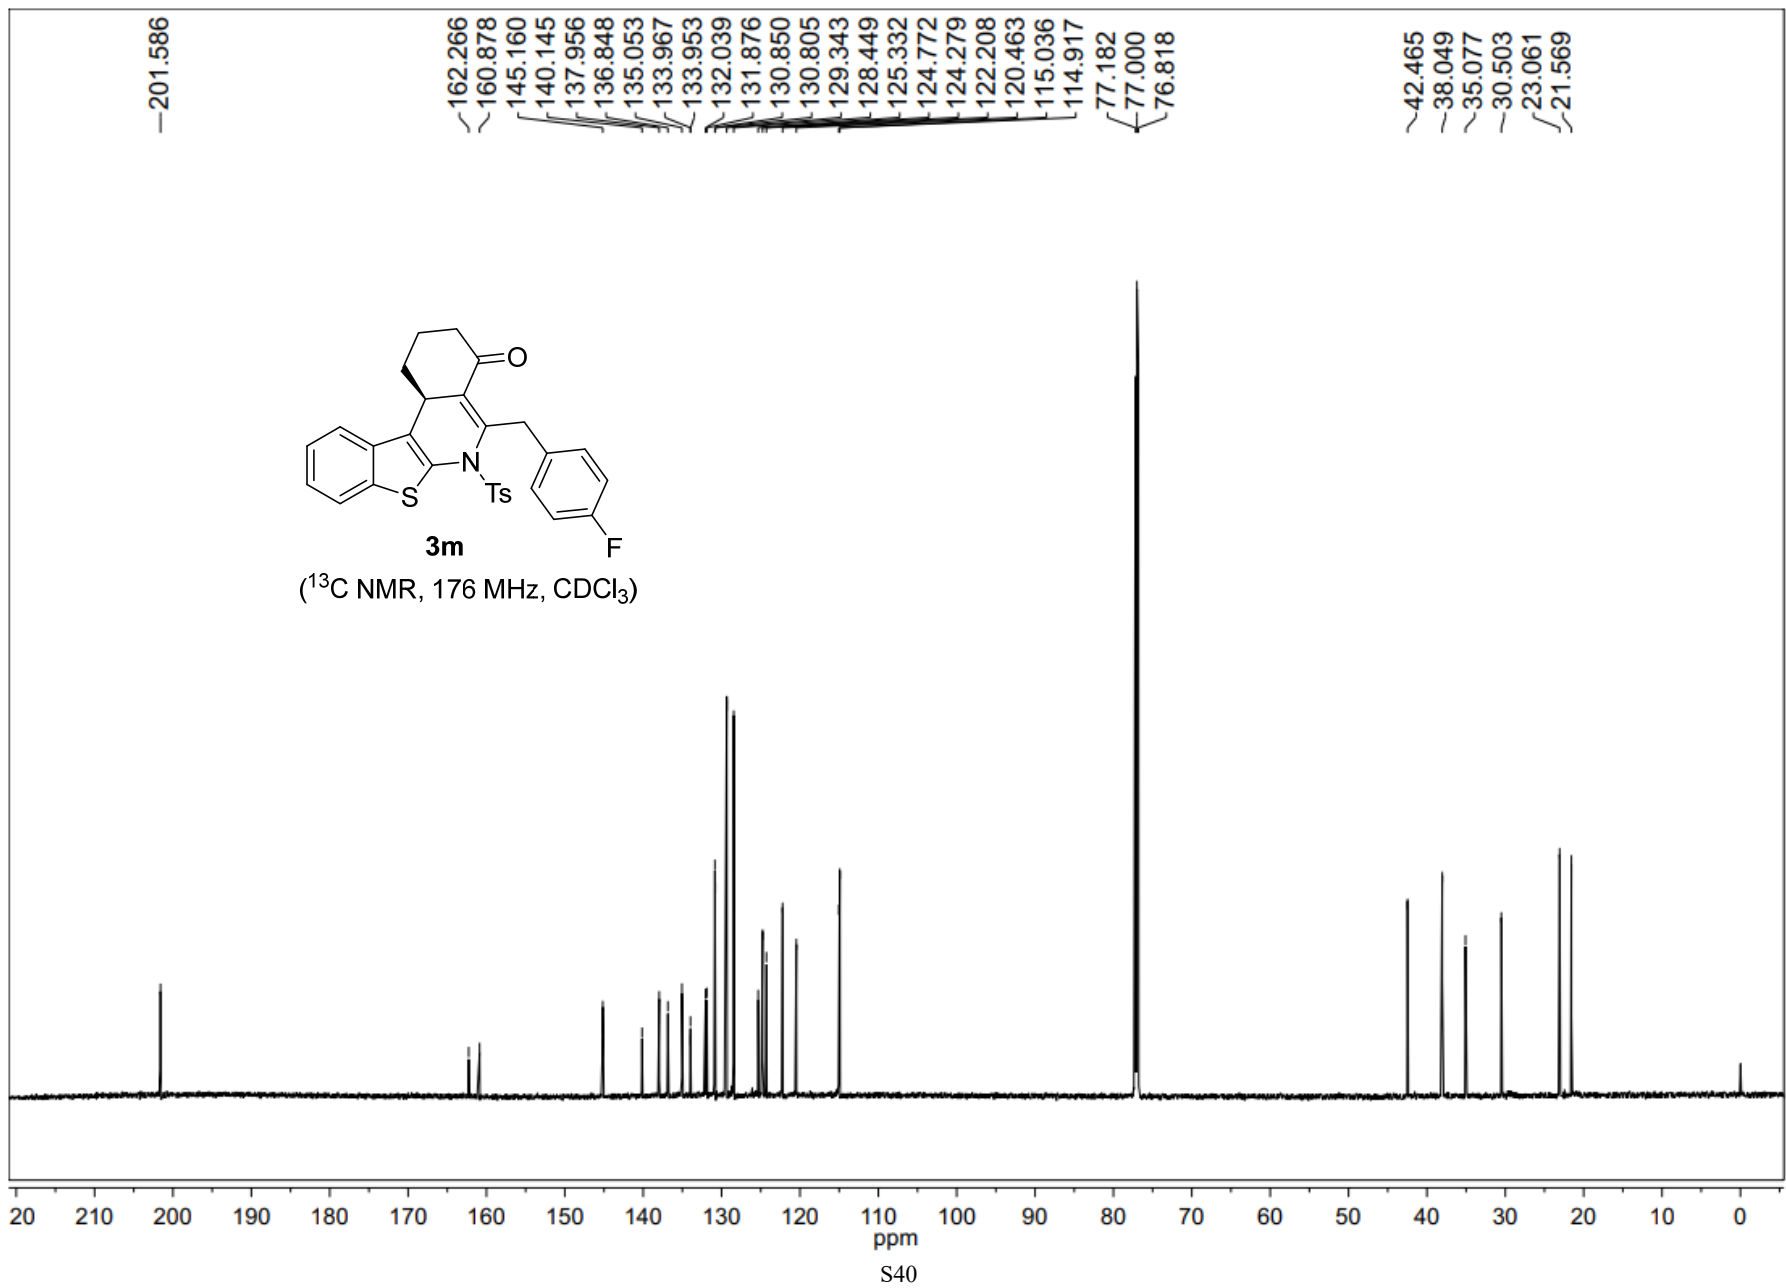

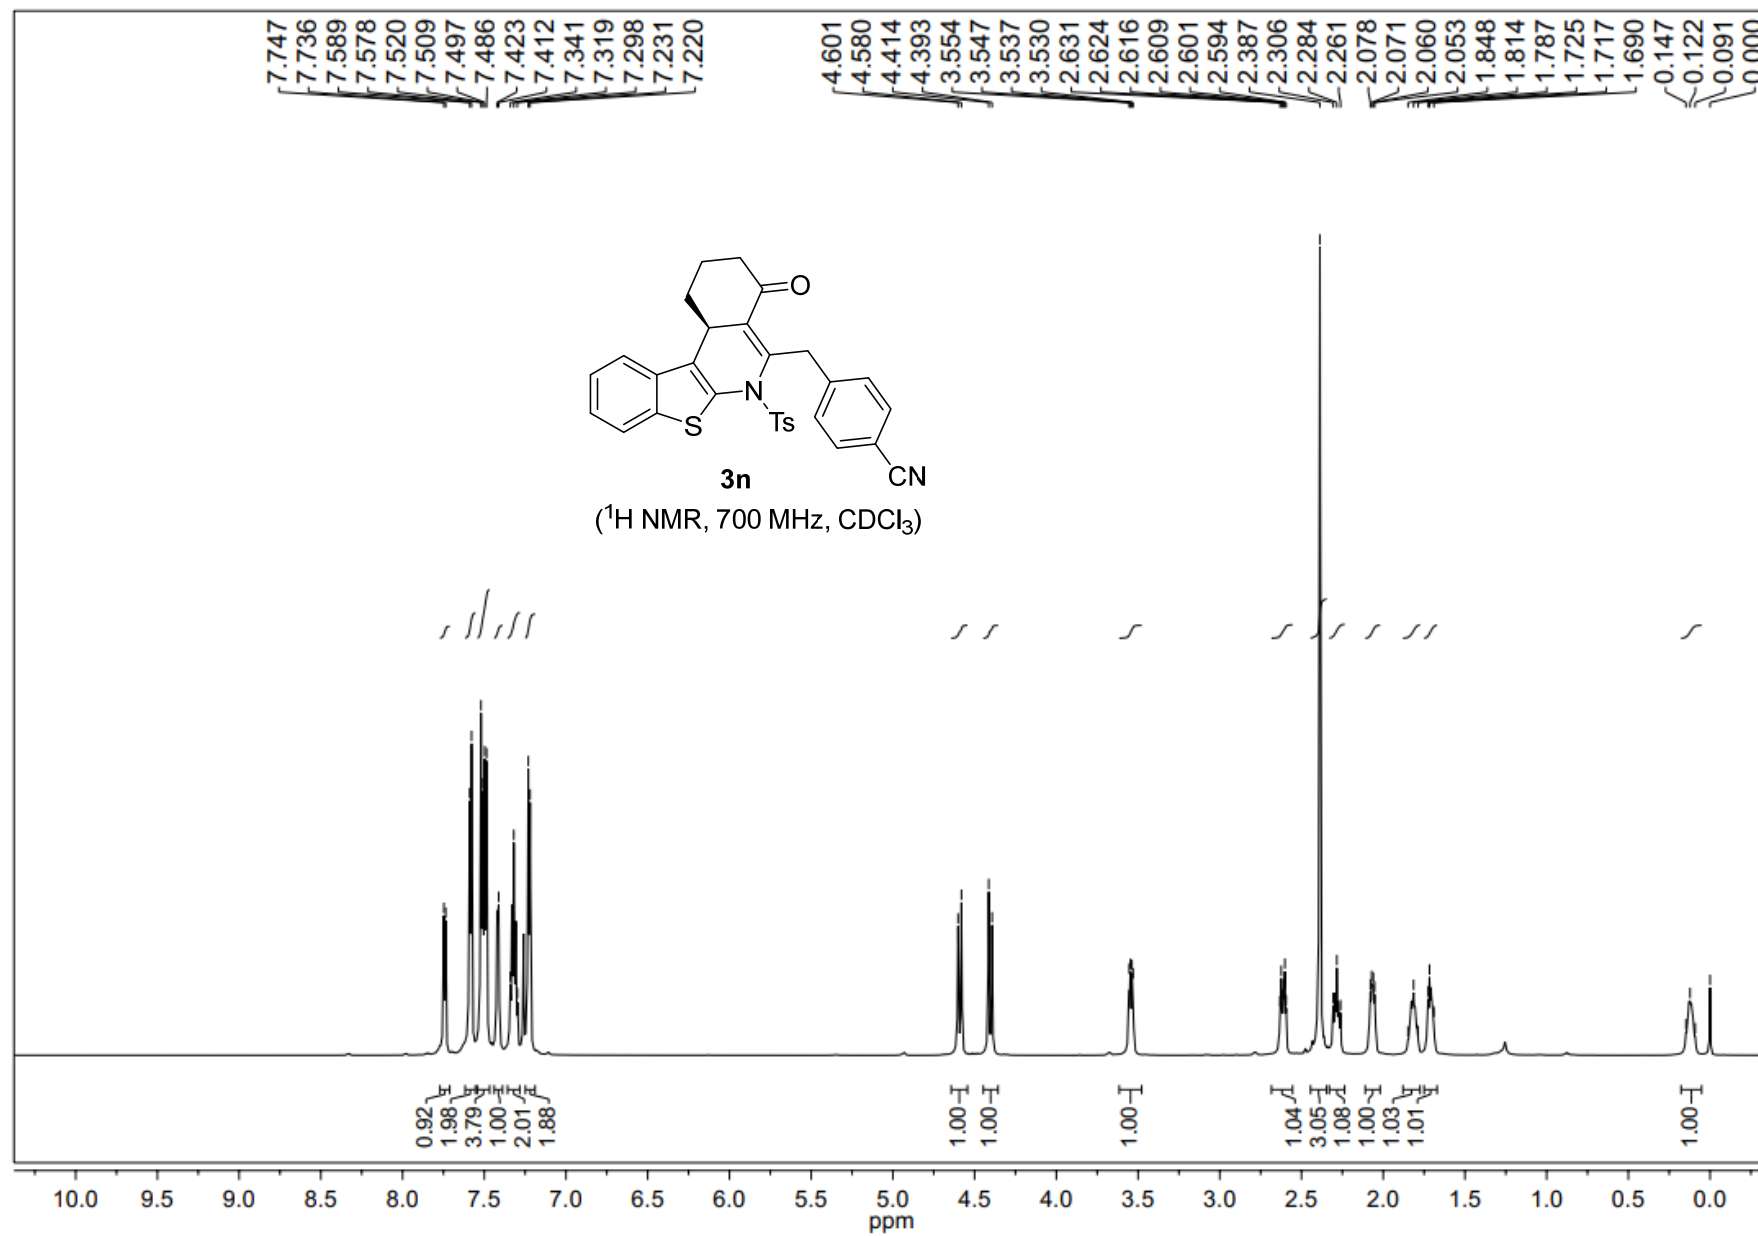

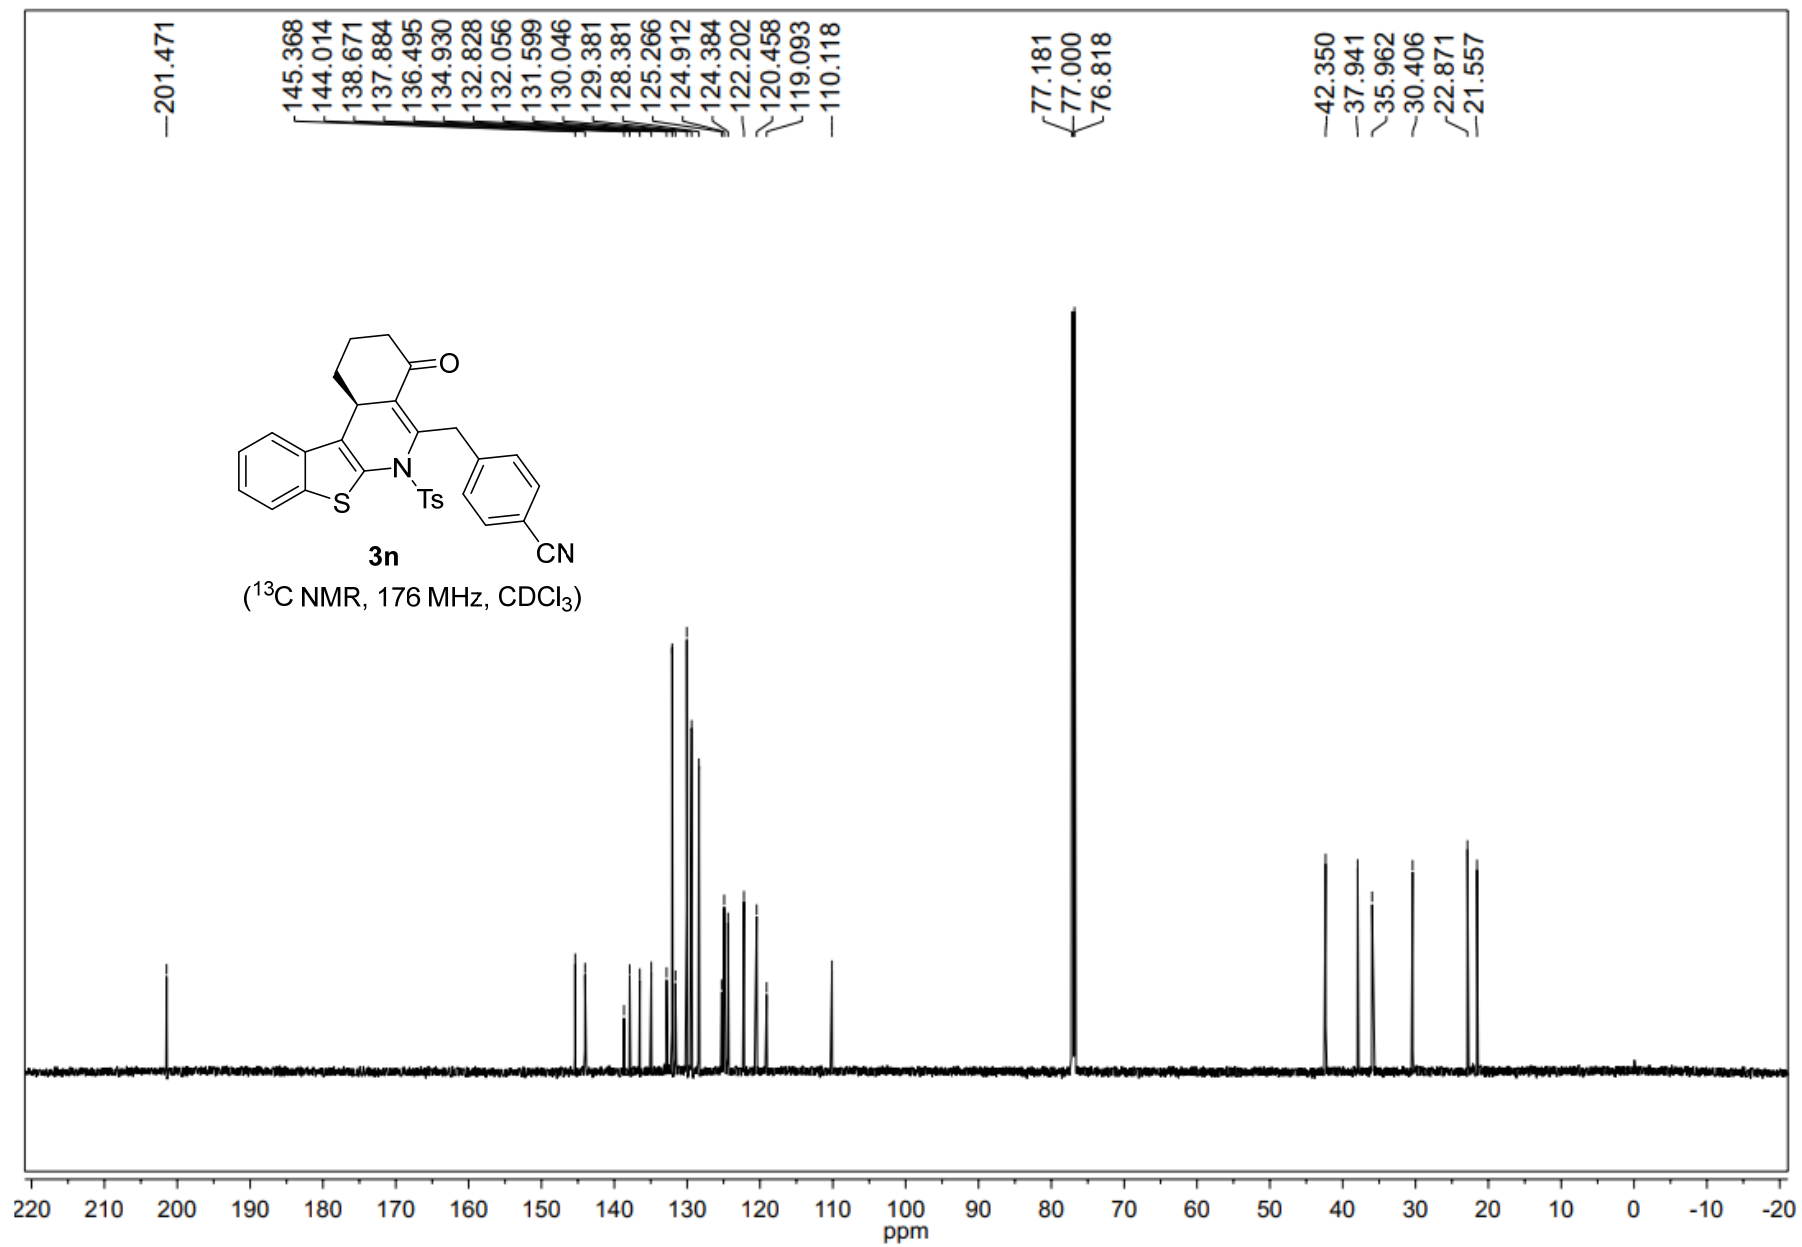

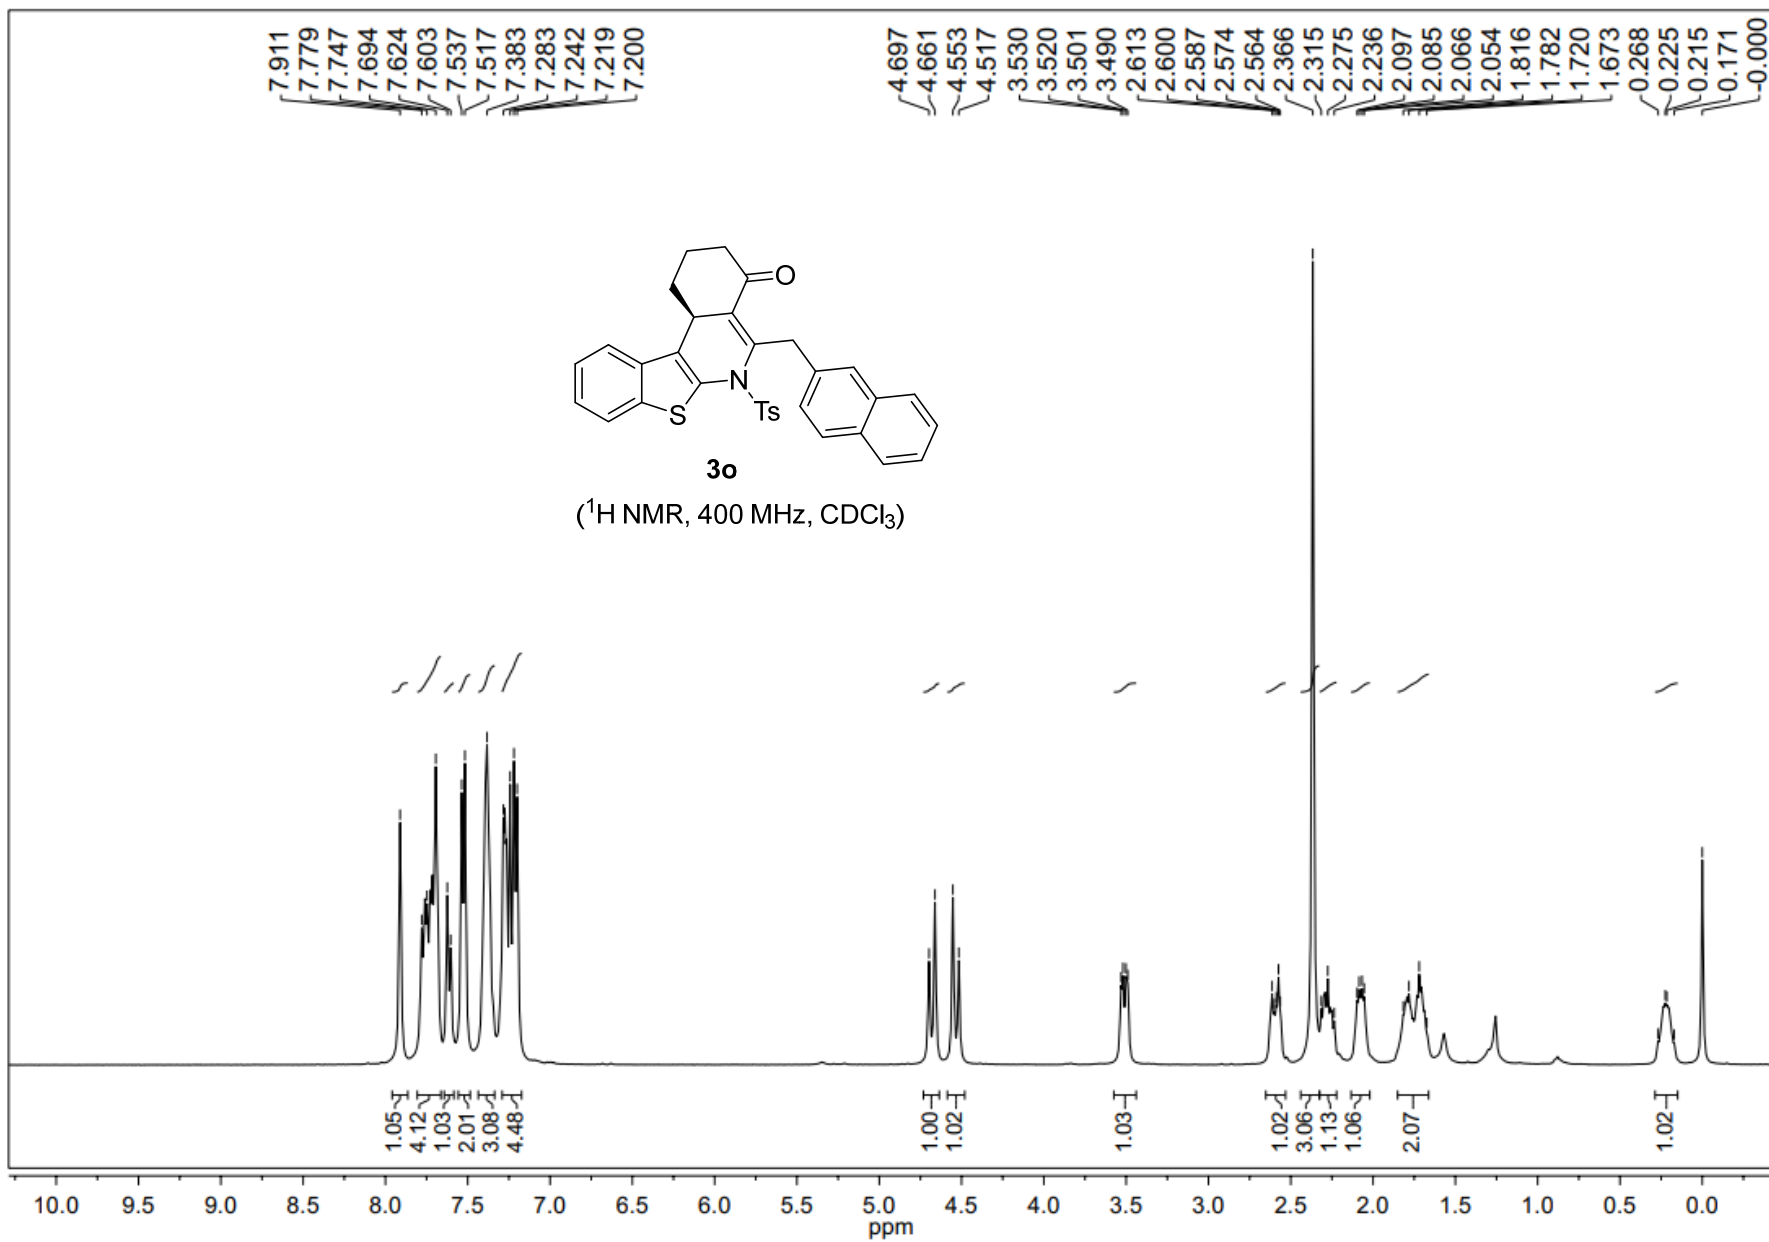

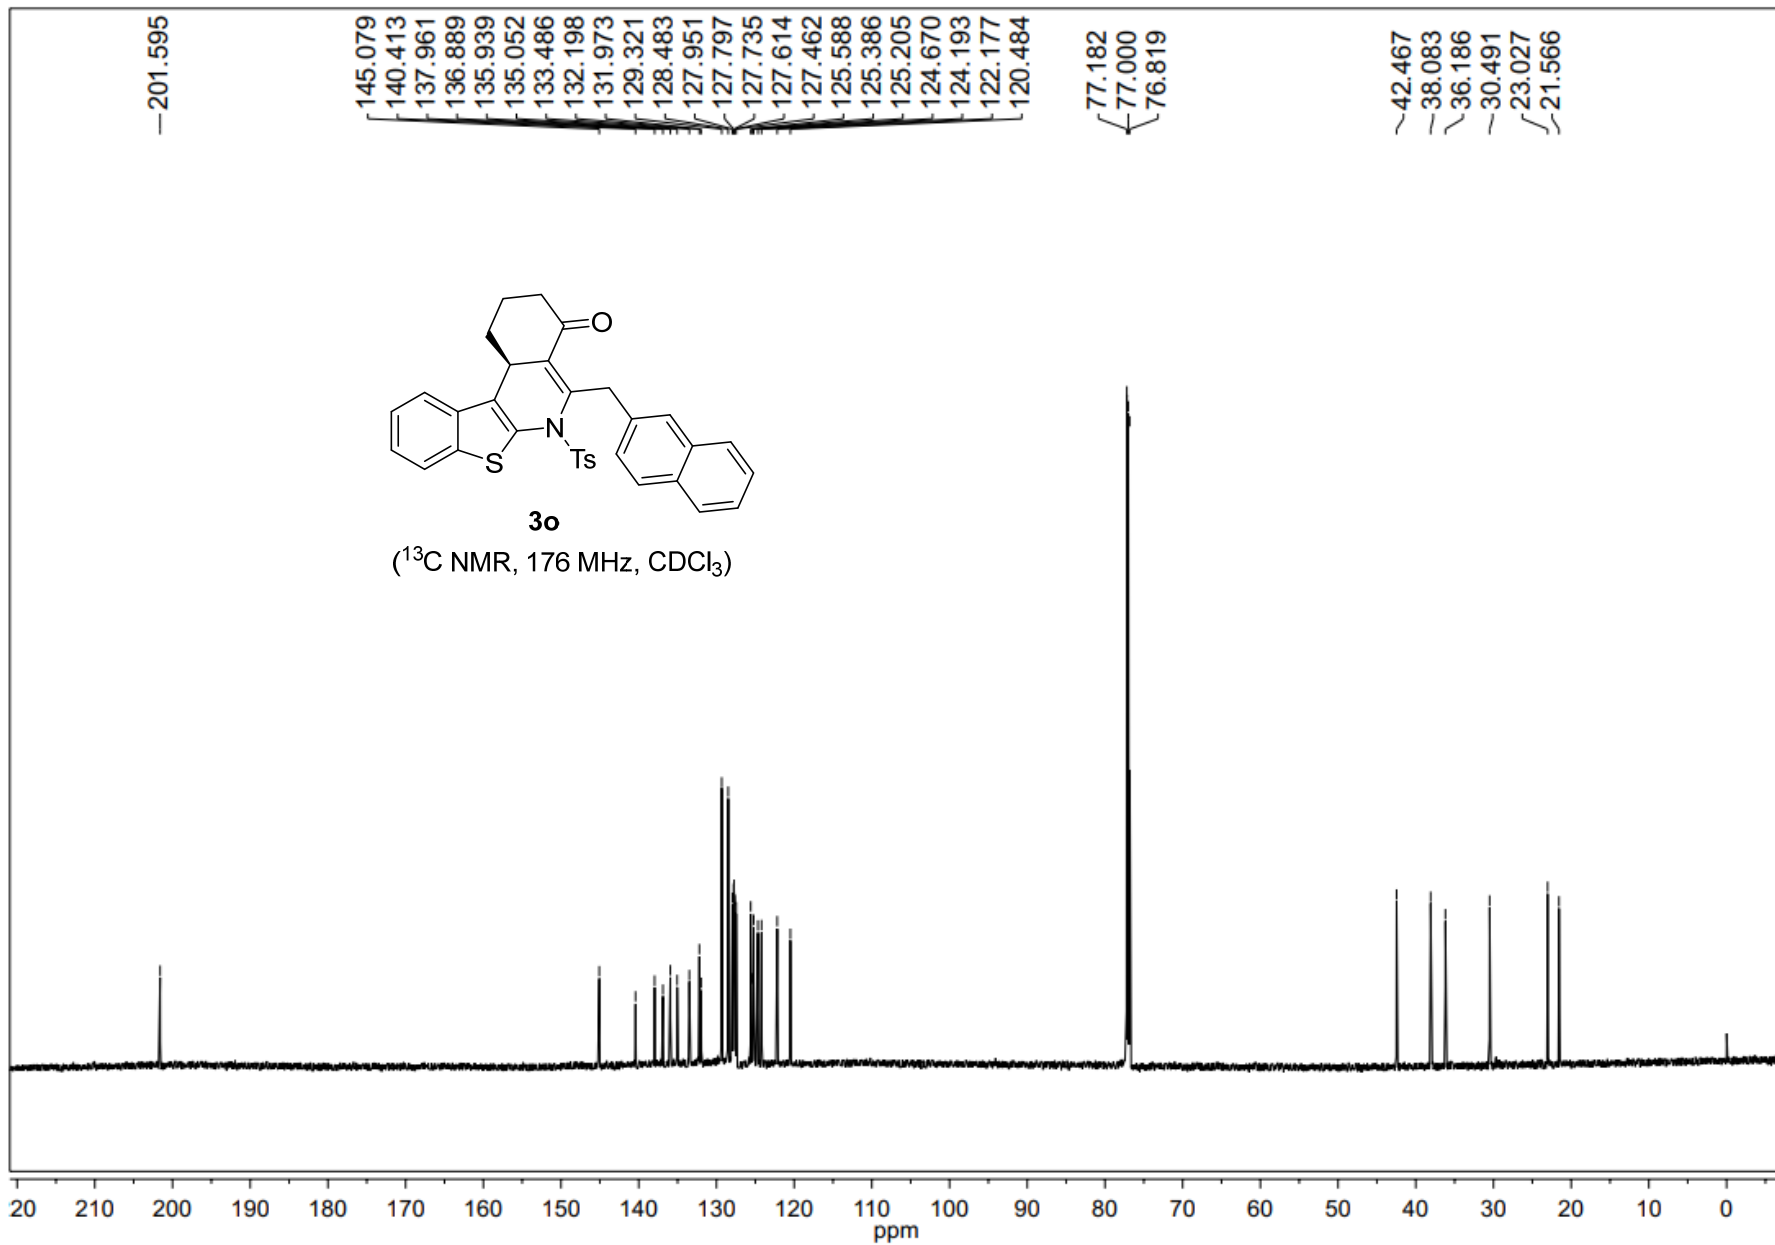

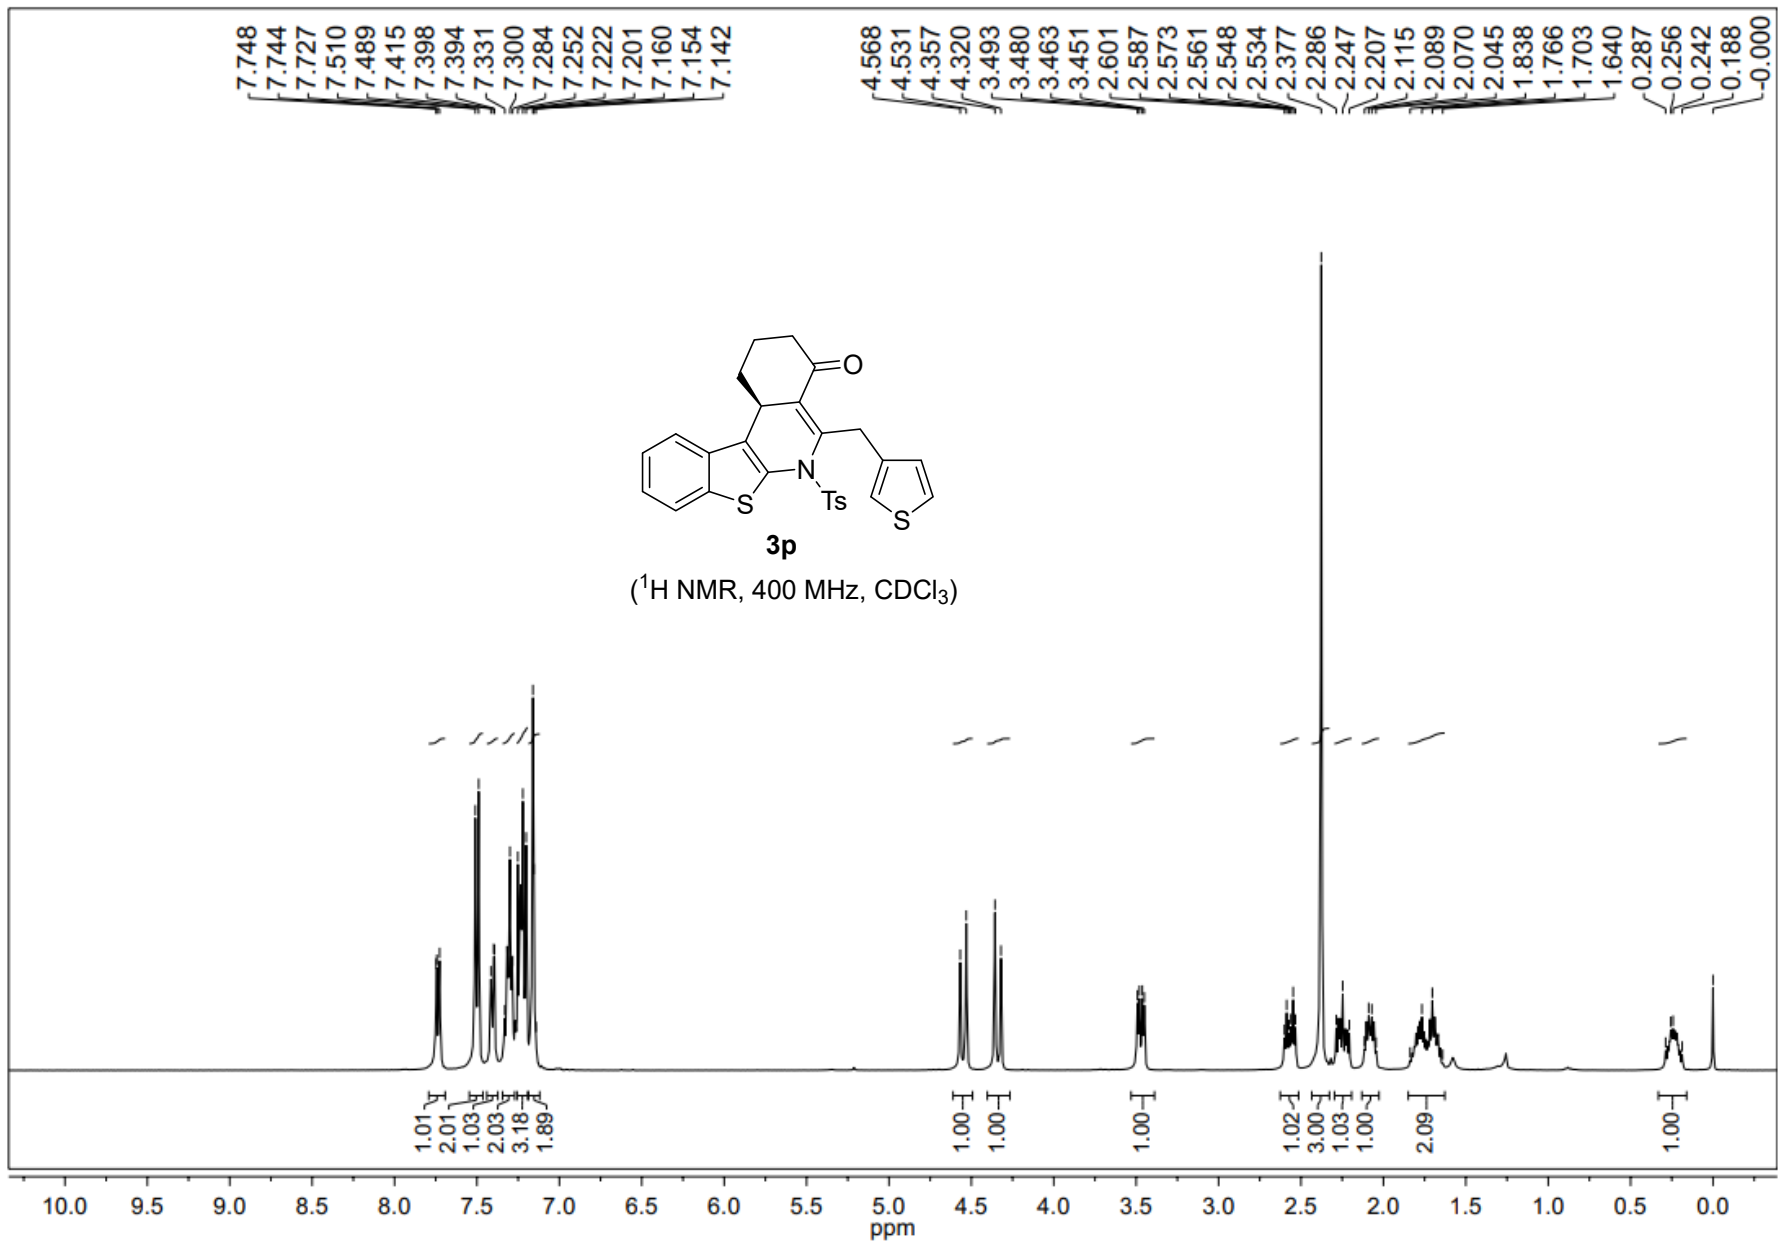

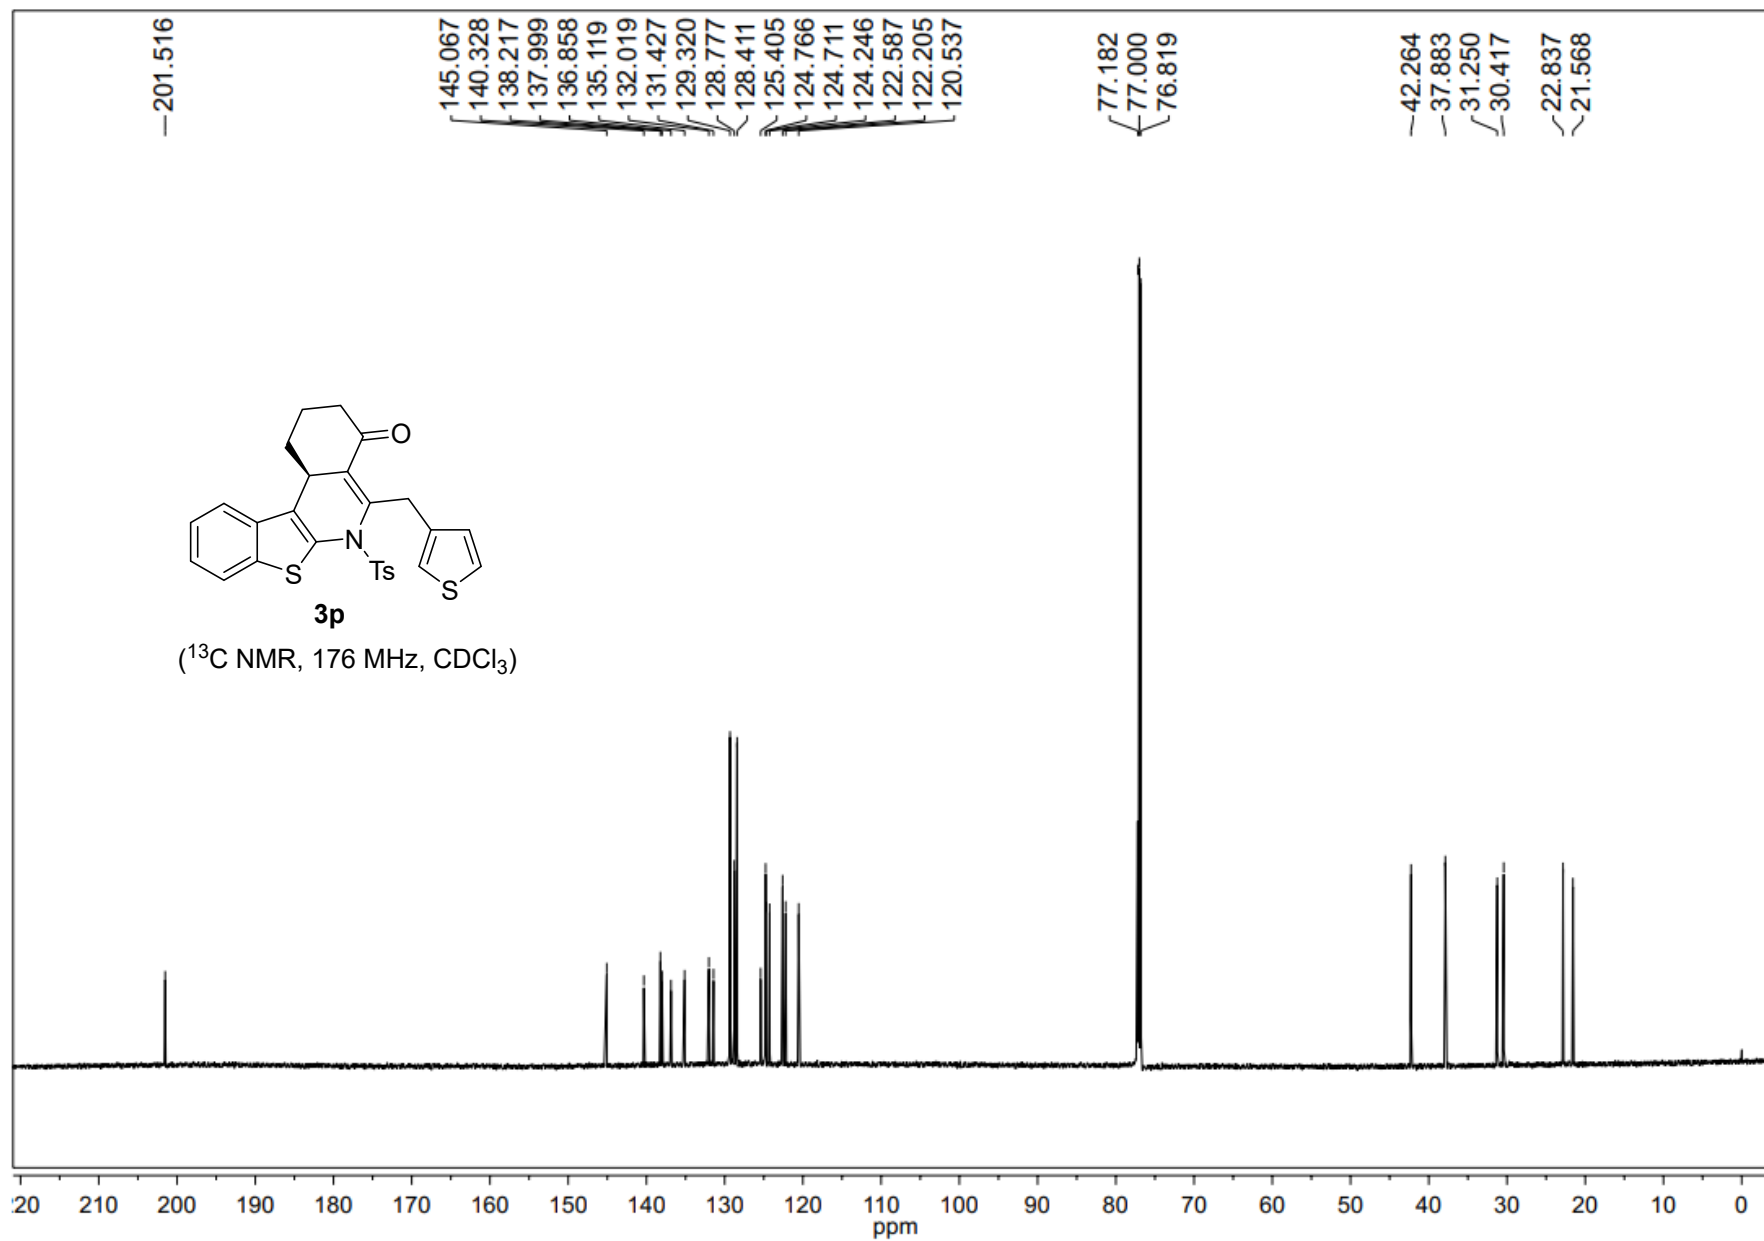

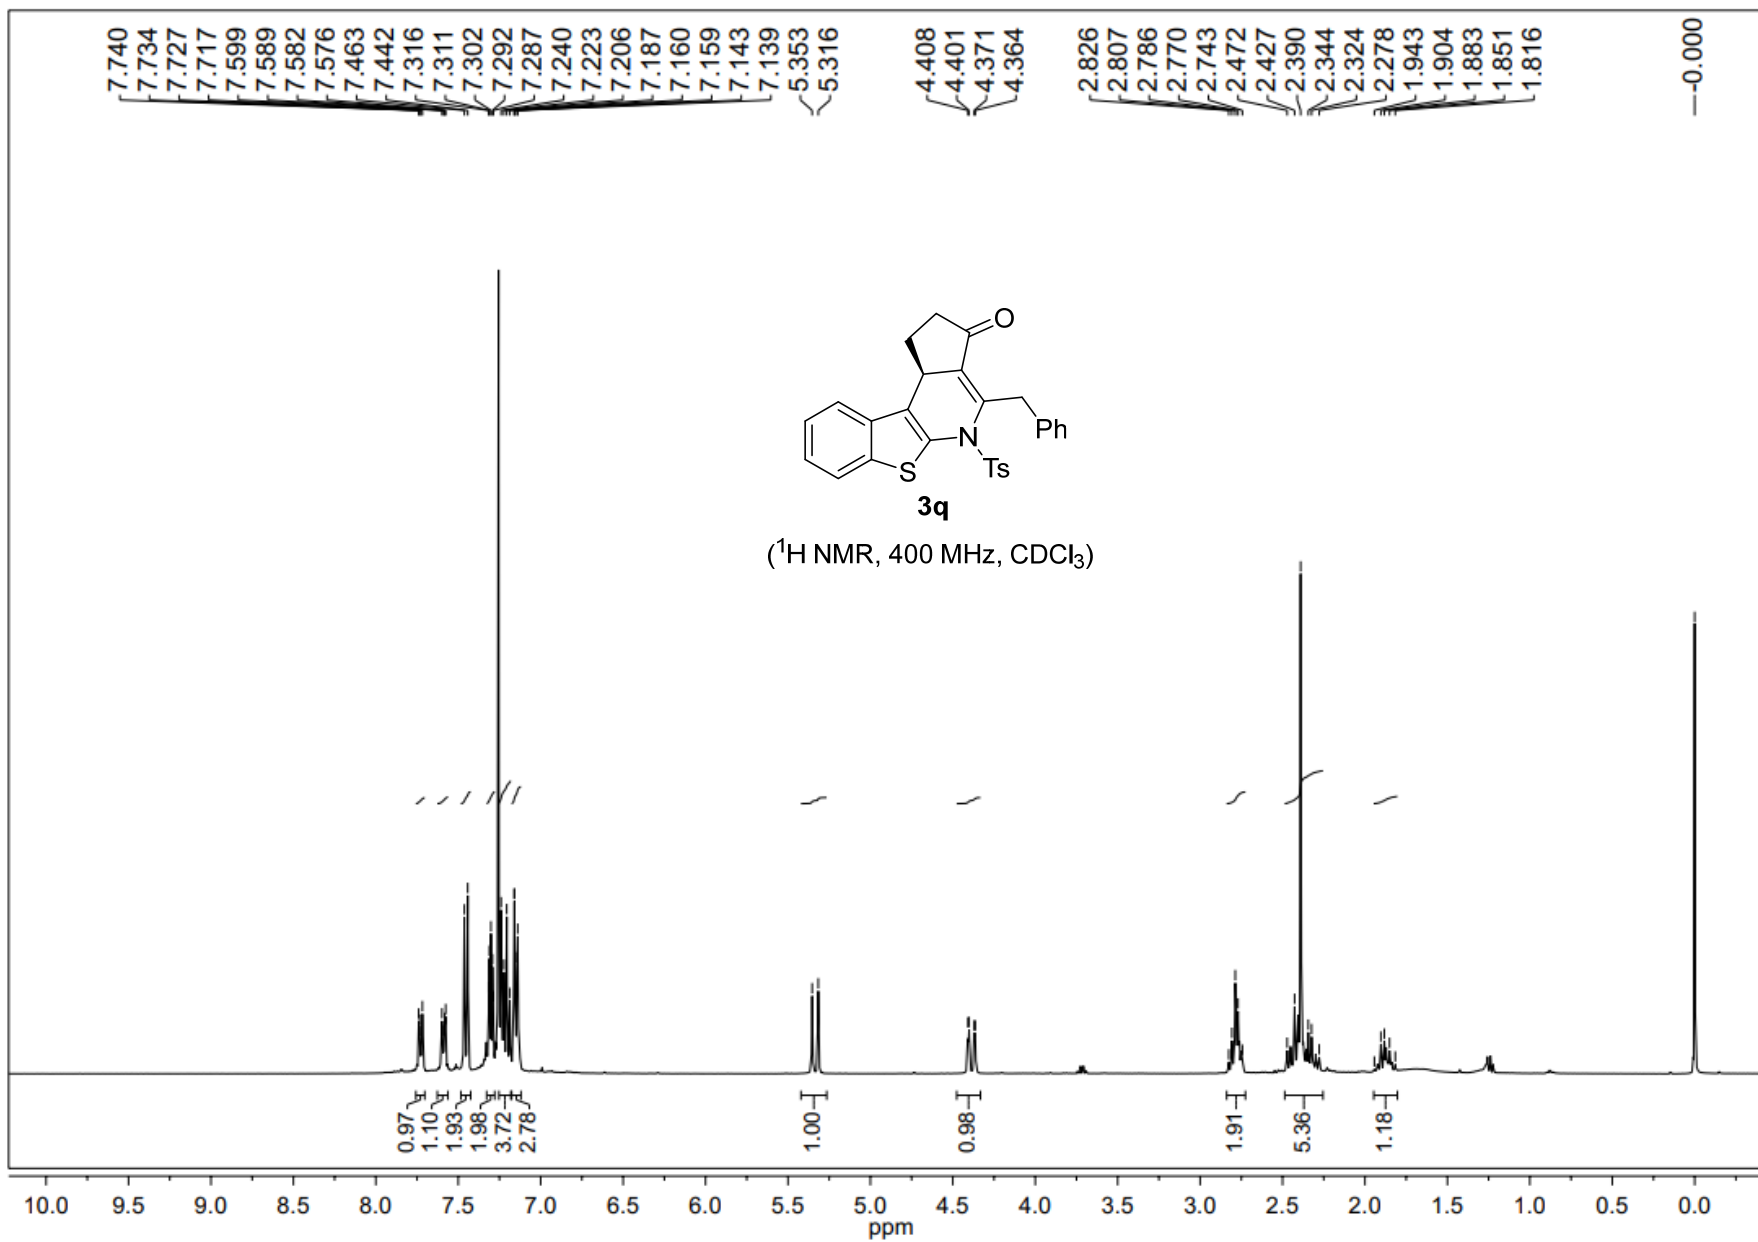



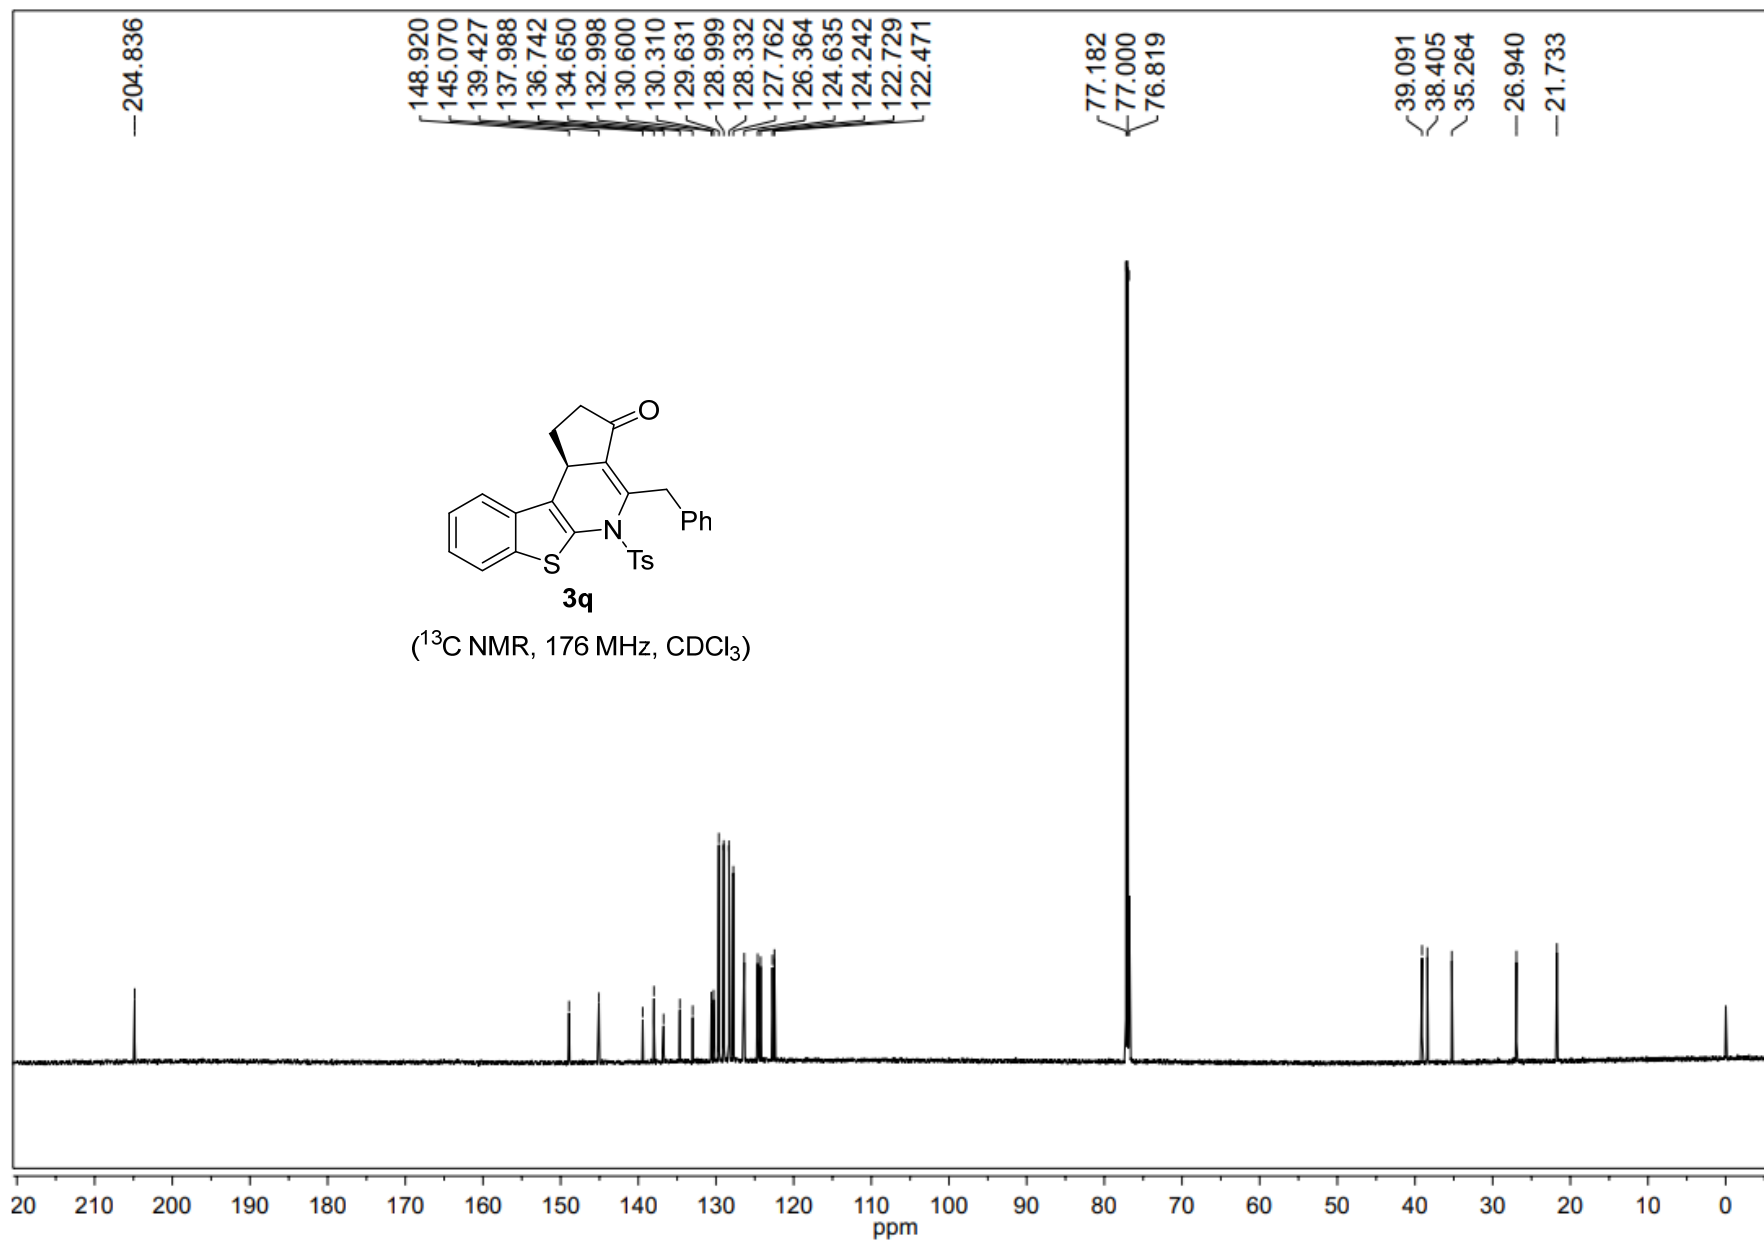

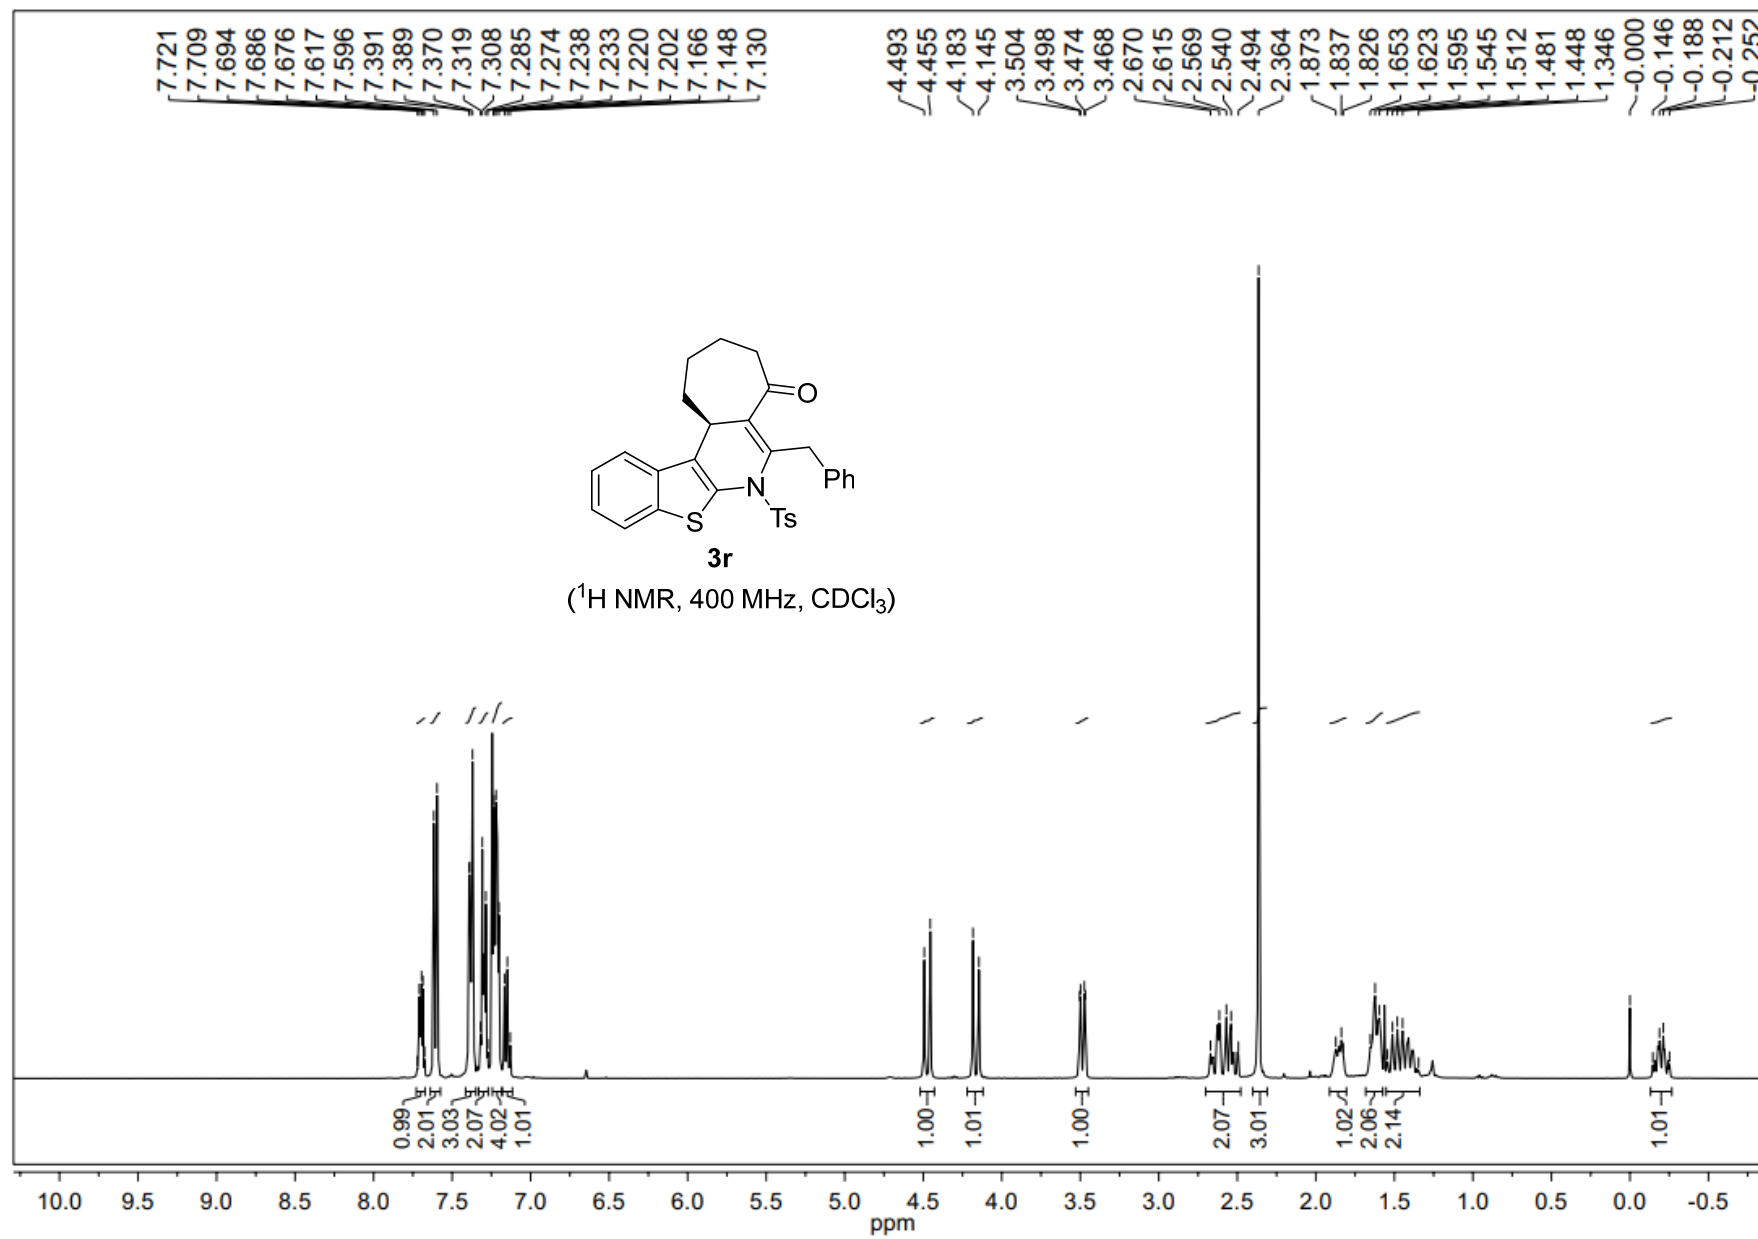

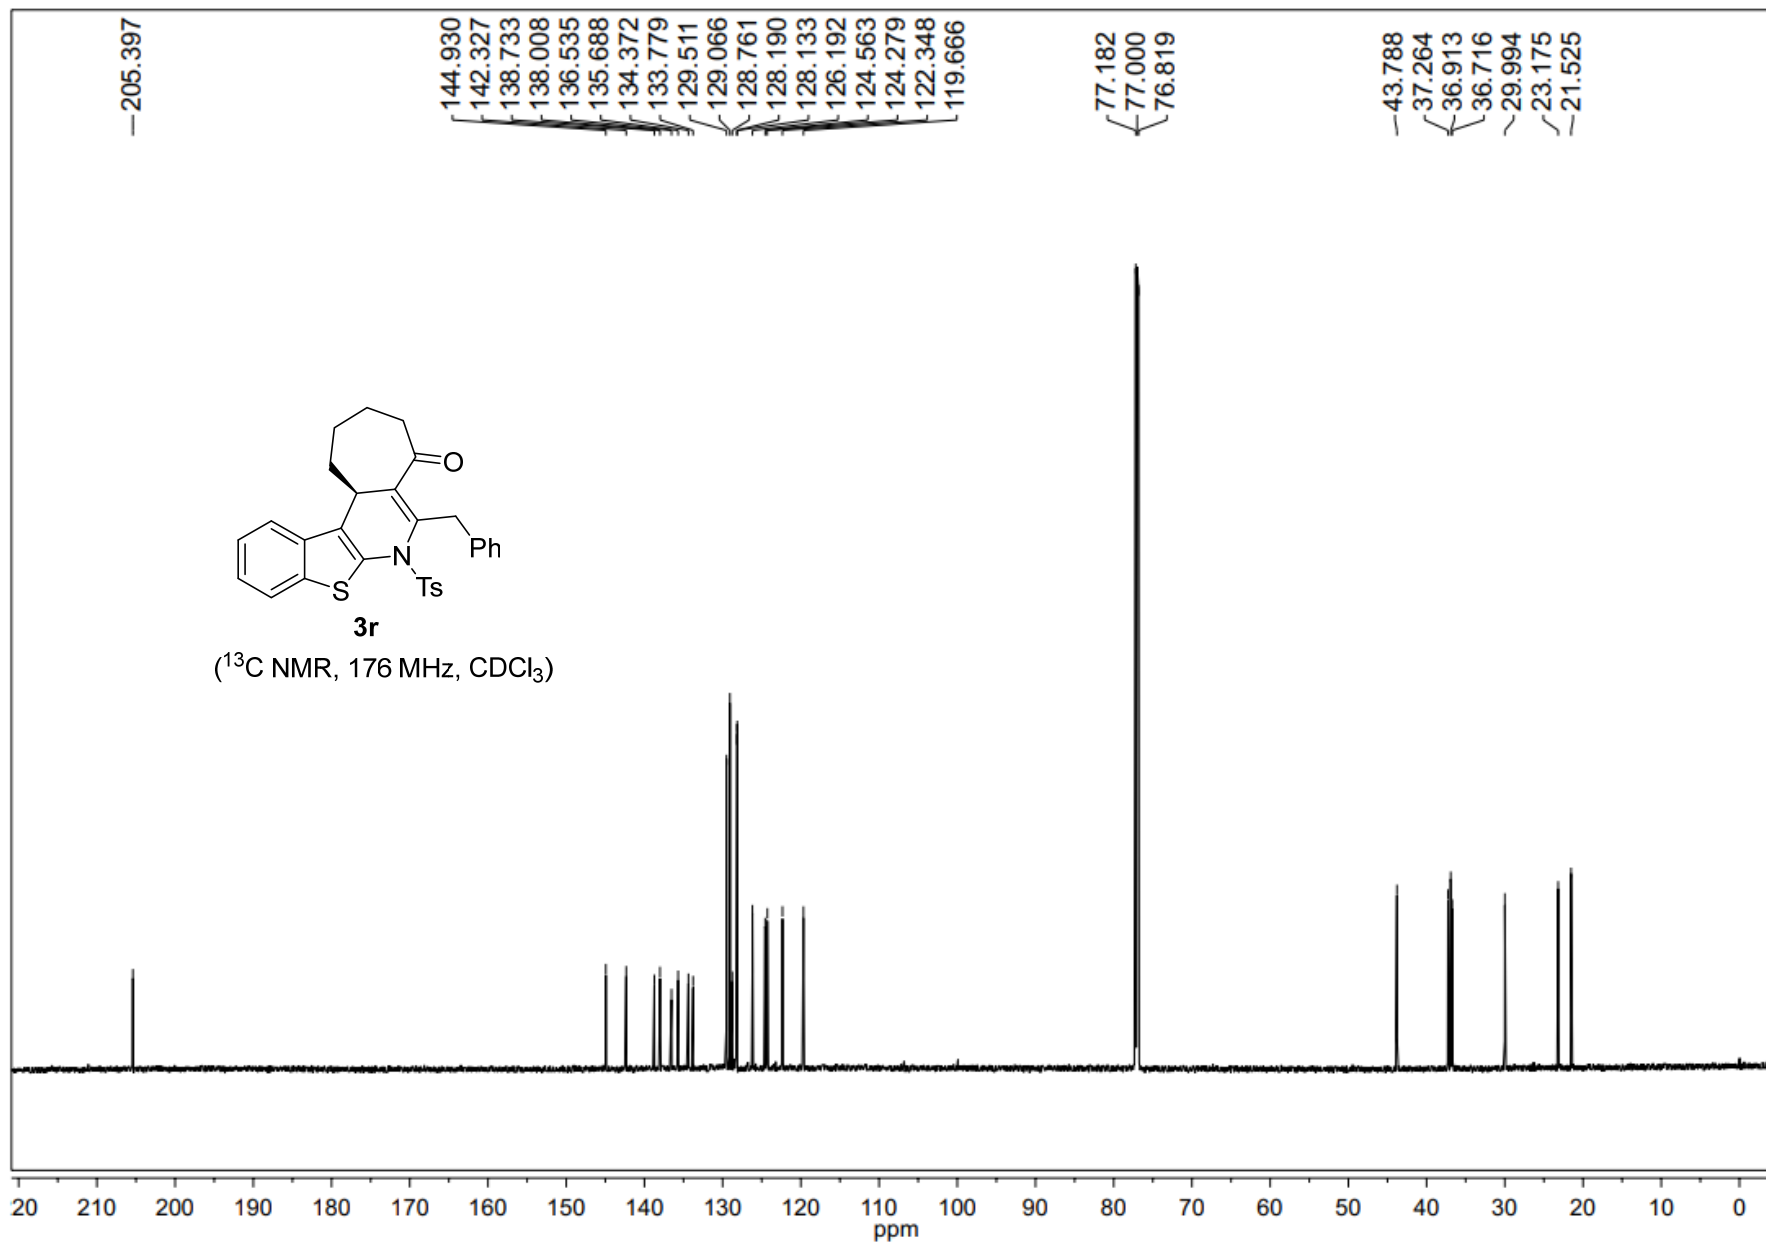

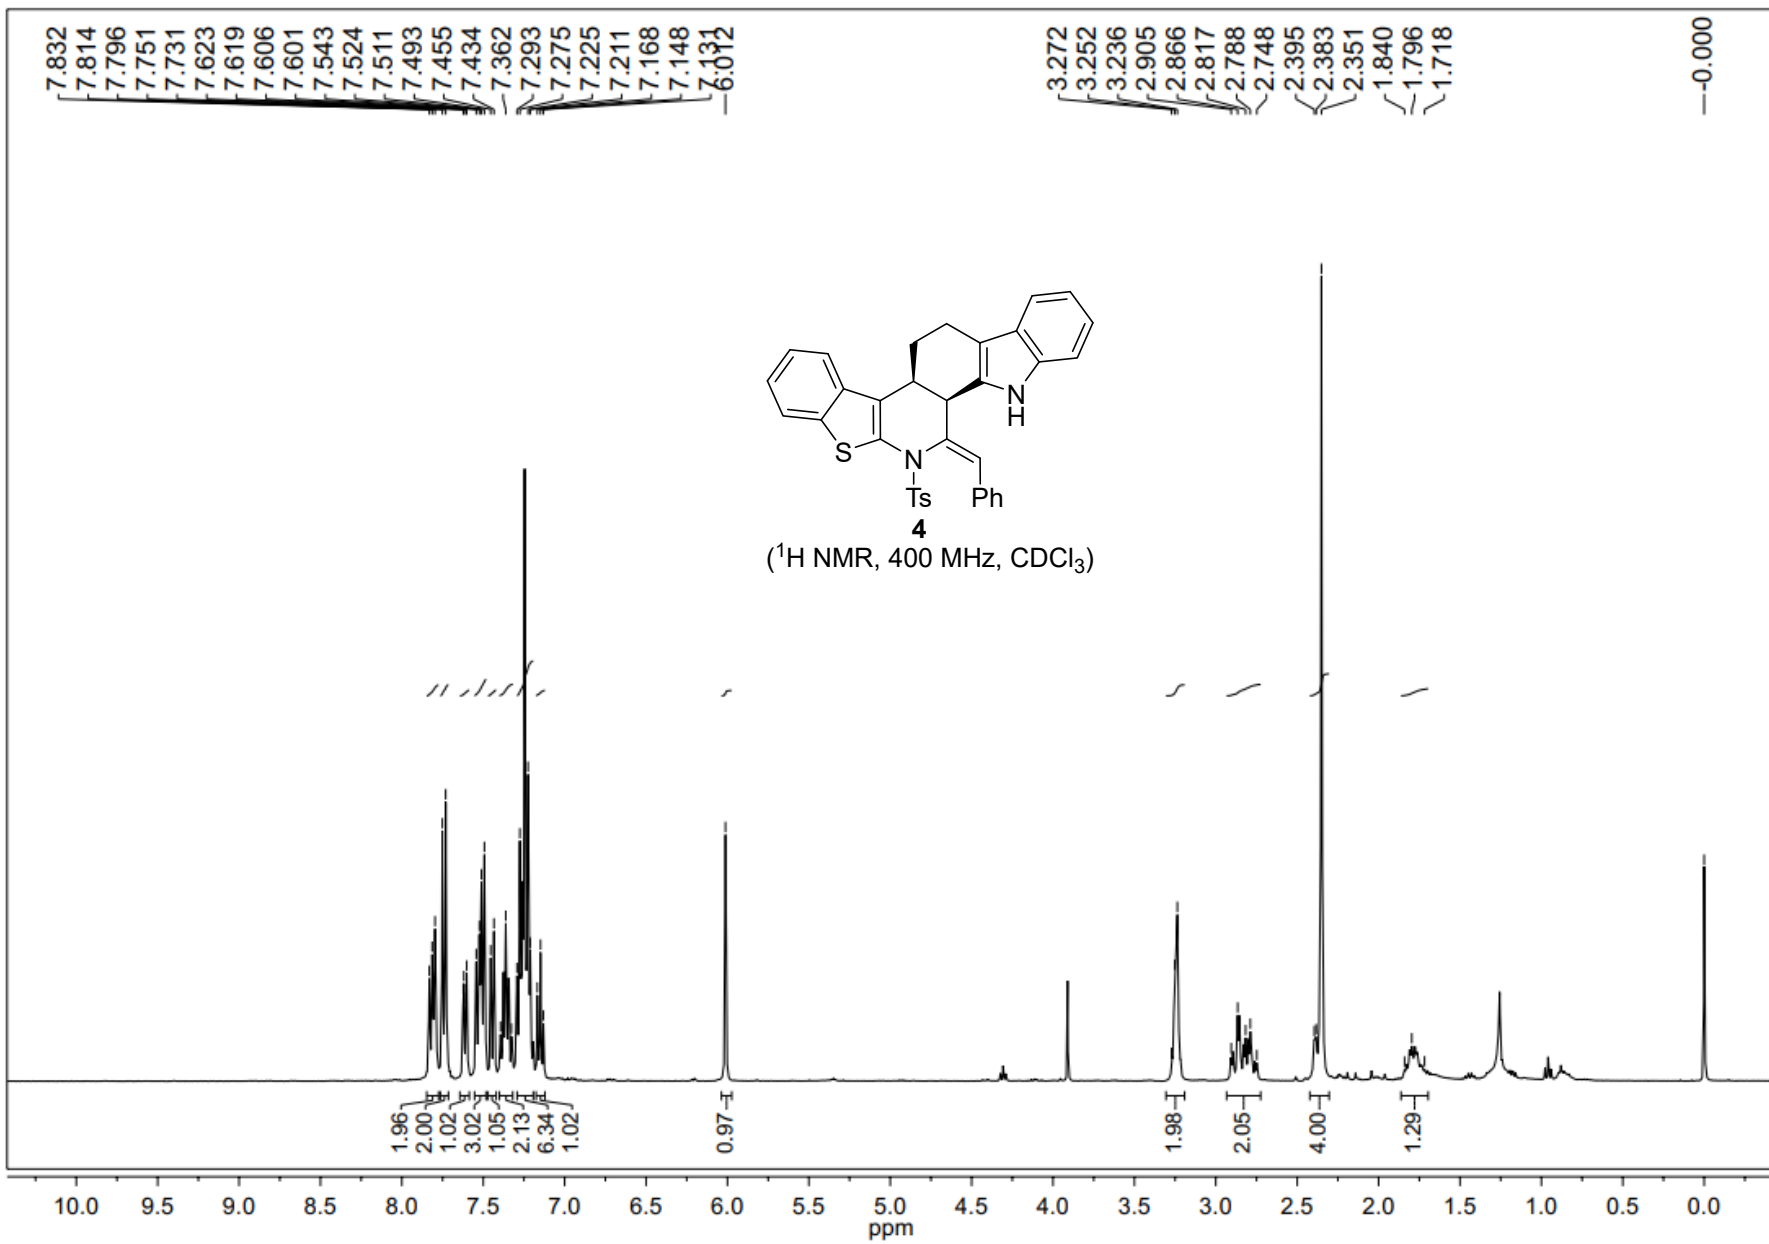

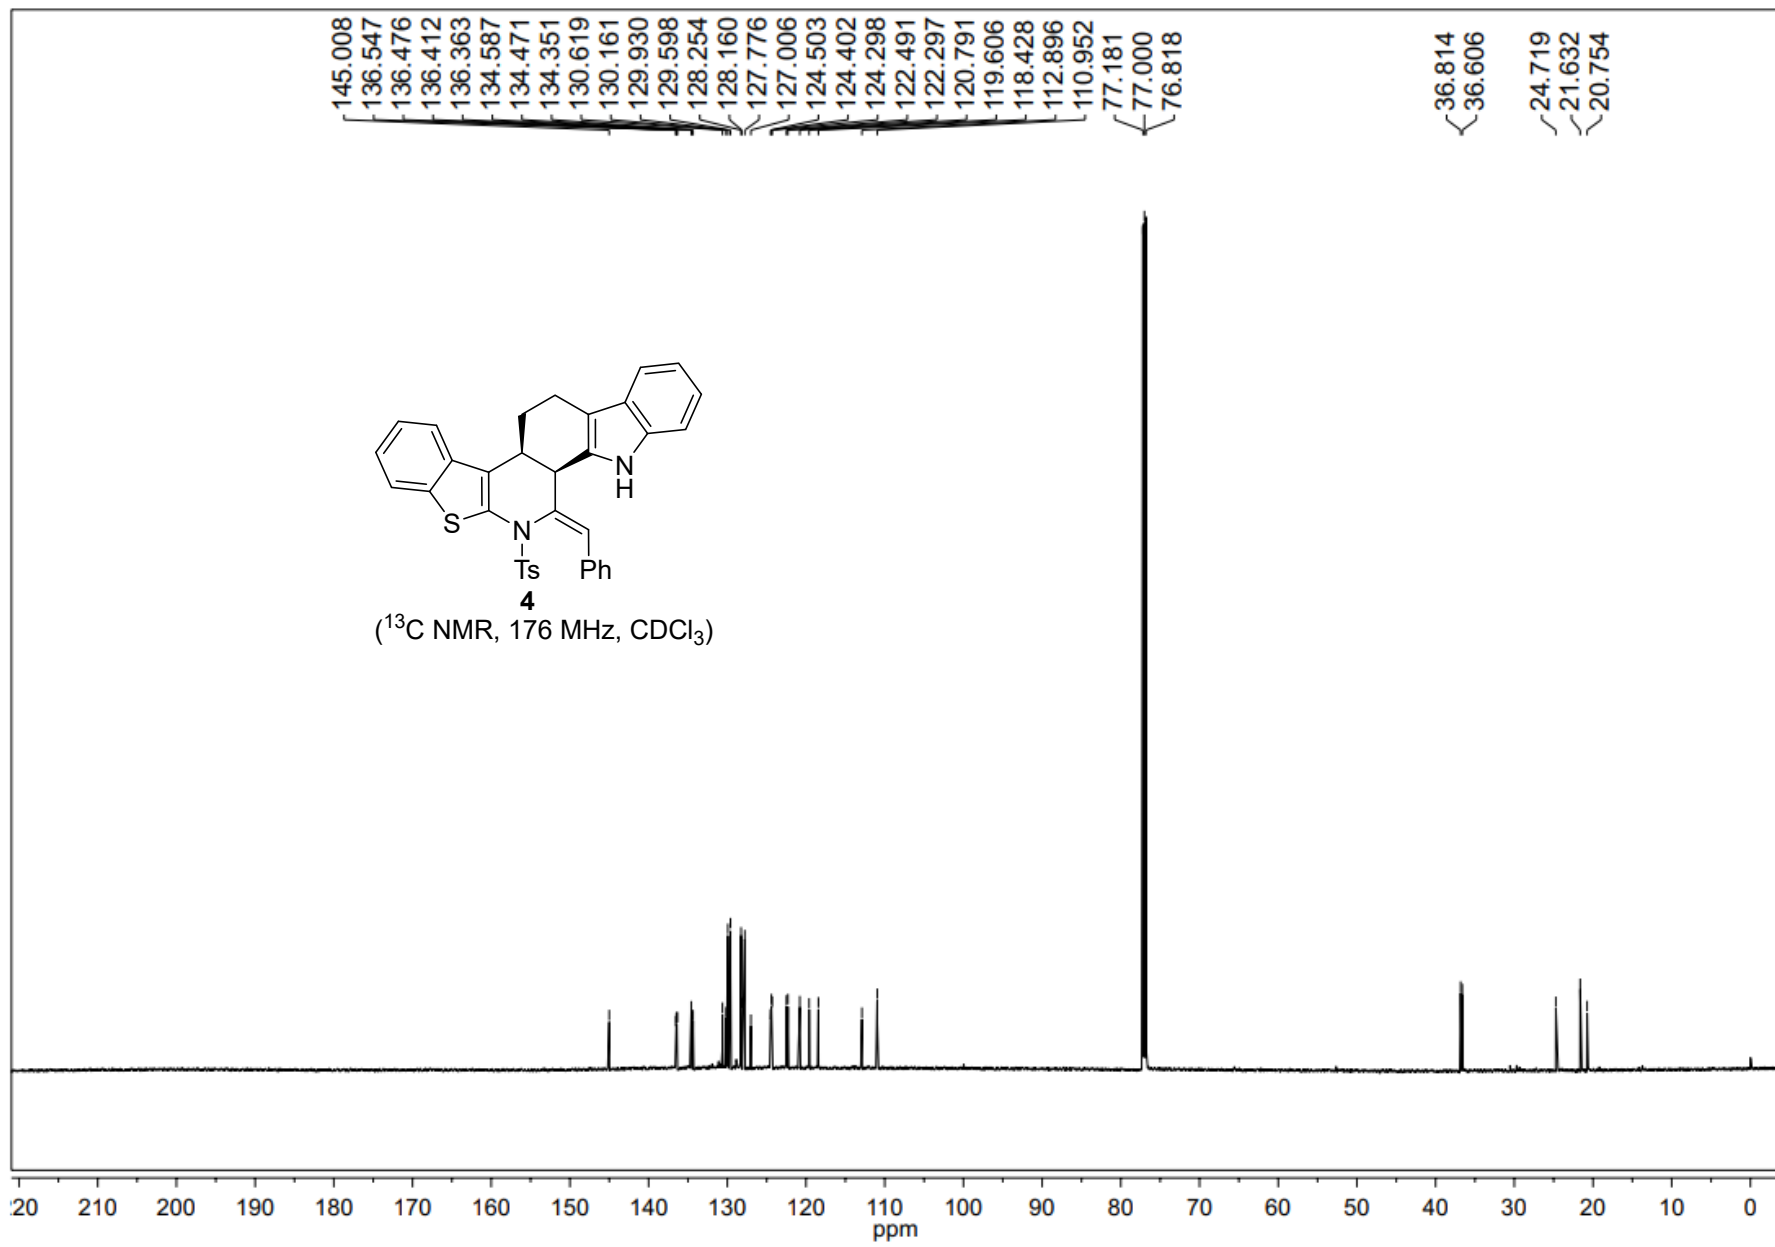

## 7. Copies of HPLC chromatograms of new products

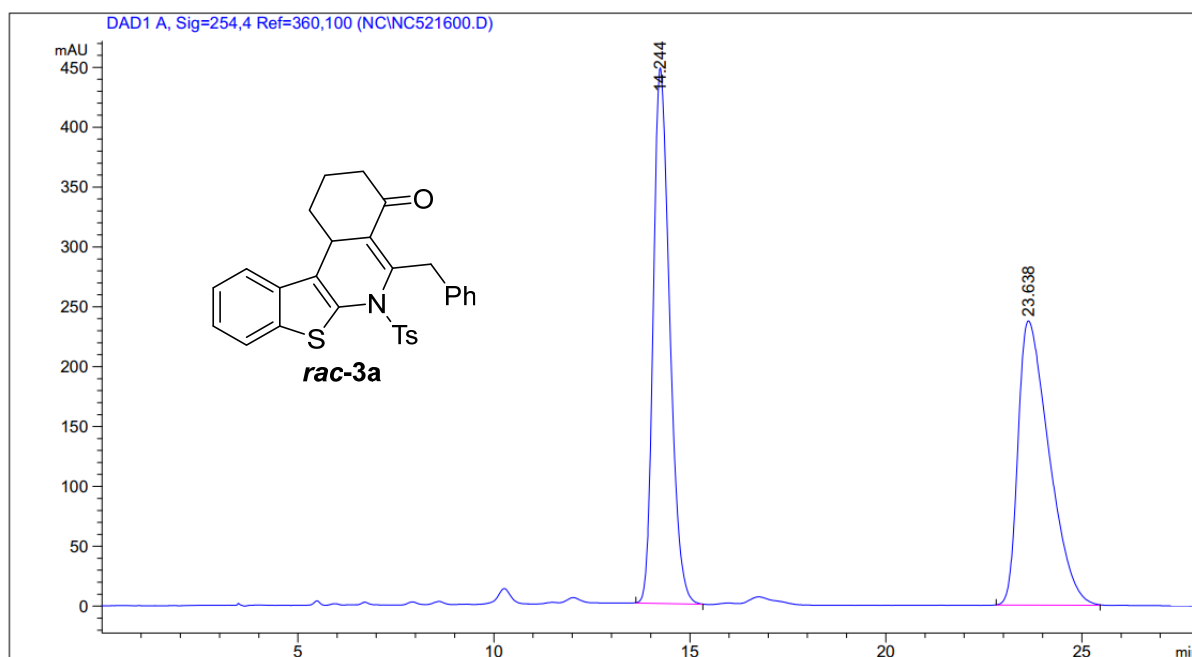

| Peak # | Ret Time [min] | Type | Width [min] | Area [mAU*s] | Height [mAU] | Area %  |
|--------|----------------|------|-------------|--------------|--------------|---------|
| 1      | 14.244         | BB   | 0.4510      | 1.30728e4    | 447.27170    | 50.0553 |
| 2      | 23.638         | BB   | 0.8248      | 1.30439e4    | 237.46489    | 49.9447 |

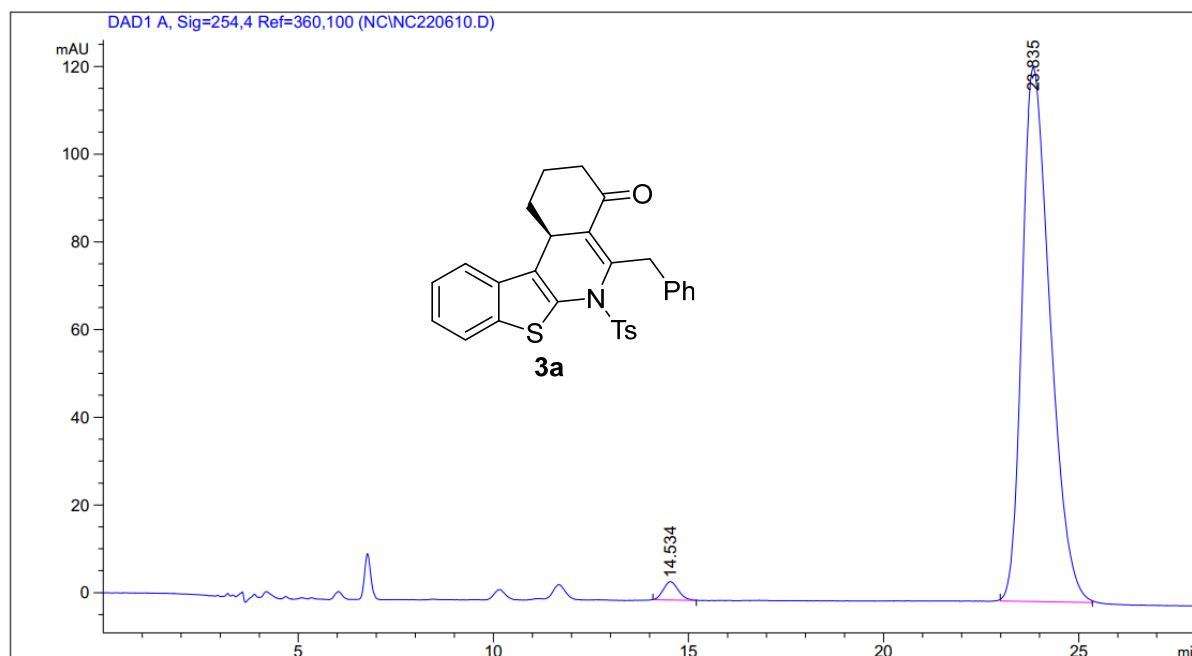

| Peak # | Ret Time [min] | Type | Width [min] | Area [mAU*s] | Height [mAU] | Area %  |
|--------|----------------|------|-------------|--------------|--------------|---------|
| 1      | 14.534         | BB   | 0.4009      | 112.92110    | 4.18356      | 1.8202  |
| 2      | 23.835         | BB   | 0.7571      | 6090.70557   | 121.85439    | 98.1798 |

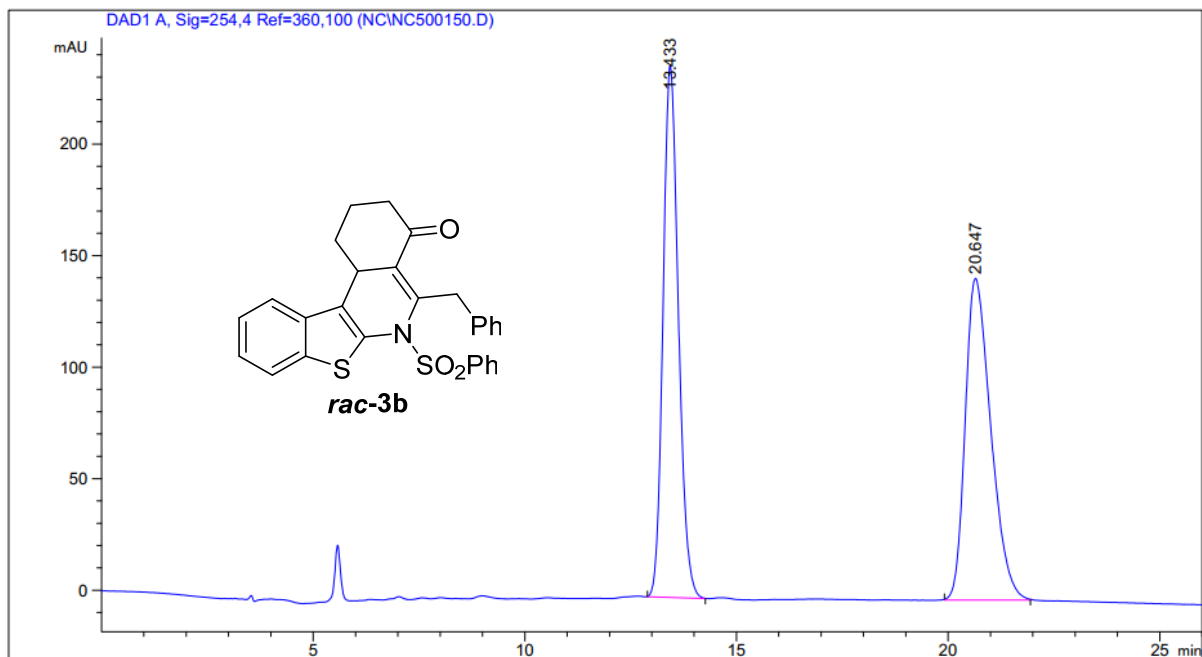

| Peak # | Ret Time [min] | Type | Width [min] | Area [mAU*s] | Height [mAU] | Area %  |
|--------|----------------|------|-------------|--------------|--------------|---------|
| 1      | 13.434         | VV   | 0.3912      | 6057.61230   | 239.40637    | 49.8980 |
| 2      | 20.648         | BB   | 0.6472      | 6082.38232   | 144.45197    | 50.1020 |

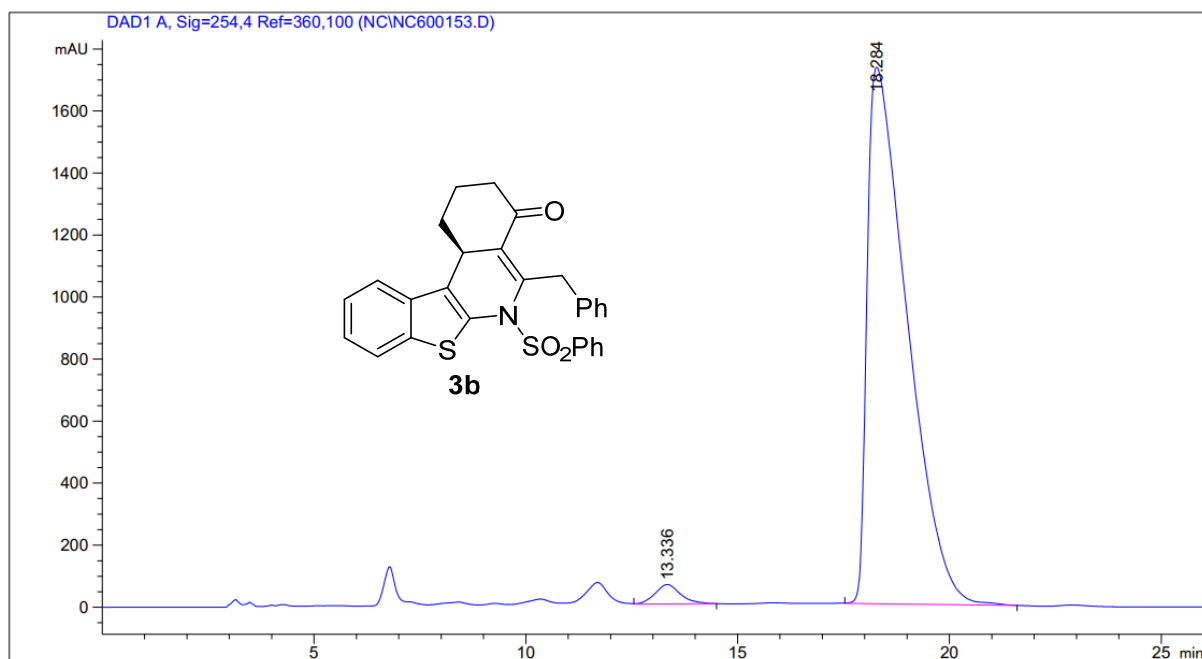

| Peak # | Ret Time [min] | Type | Width [min] | Area [mAU*s] | Height [mAU] | Area %  |
|--------|----------------|------|-------------|--------------|--------------|---------|
| 1      | 13.336         | VB   | 0.6290      | 2681.40552   | 63.19329     | 2.3163  |
| 2      | 18.284         | BB   | 0.9090      | 1.13082e5    | 1729.18054   | 97.6837 |

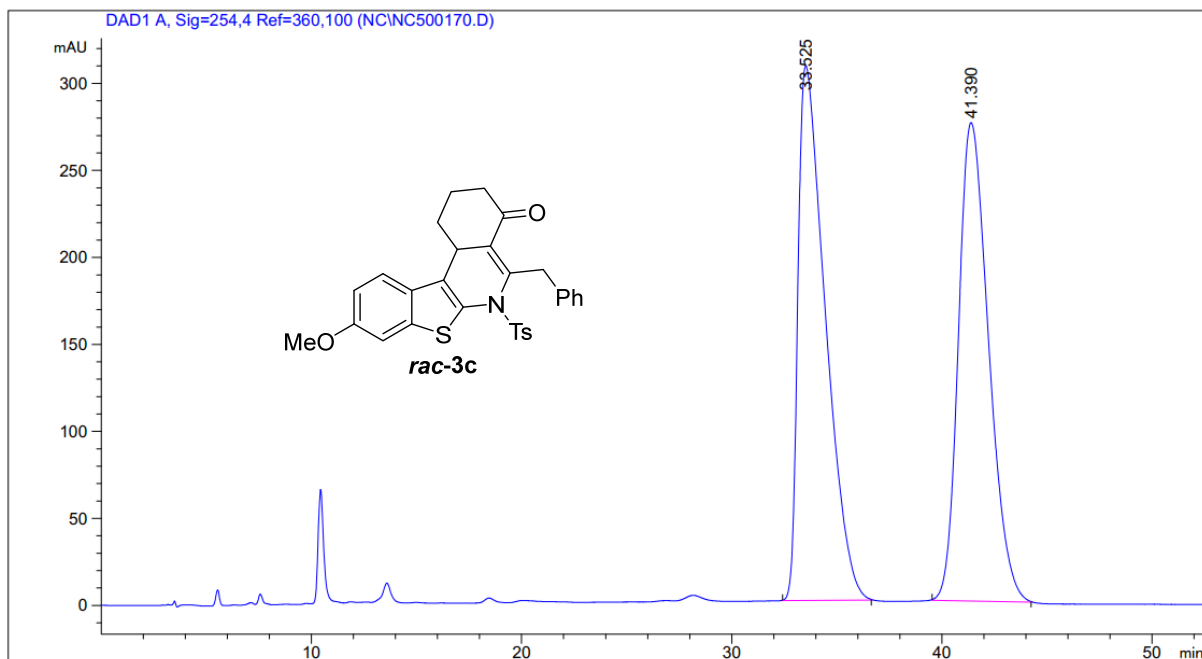

| Peak # | Ret Time [min] | Type | Width [min] | Area [mAU*s] | Height [mAU] | Area %  |
|--------|----------------|------|-------------|--------------|--------------|---------|
| 1      | 33.527         | BB   | 1.3520      | 2.78493e4    | 307.68649    | 50.2254 |
| 2      | 41.391         | BB   | 1.5600      | 2.75994e4    | 275.67569    | 49.7746 |

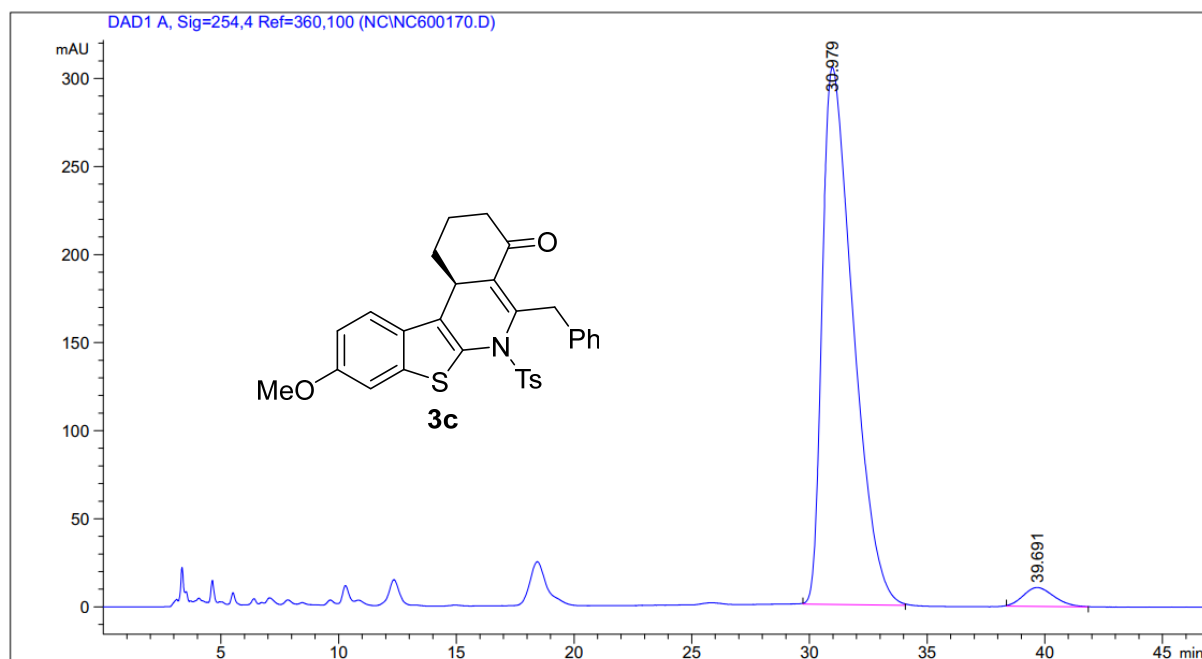

| Peak # | Ret Time [min] | Type | Width [min] | Area [mAU*s] | Height [mAU] | Area %  |
|--------|----------------|------|-------------|--------------|--------------|---------|
| 1      | 30.979         | BB   | 1.3877      | 2.78152e4    | 305.08267    | 96.4944 |
| 2      | 39.681         | BB   | 1.2905      | 1010.51318   | 10.89061     | 3.5056  |



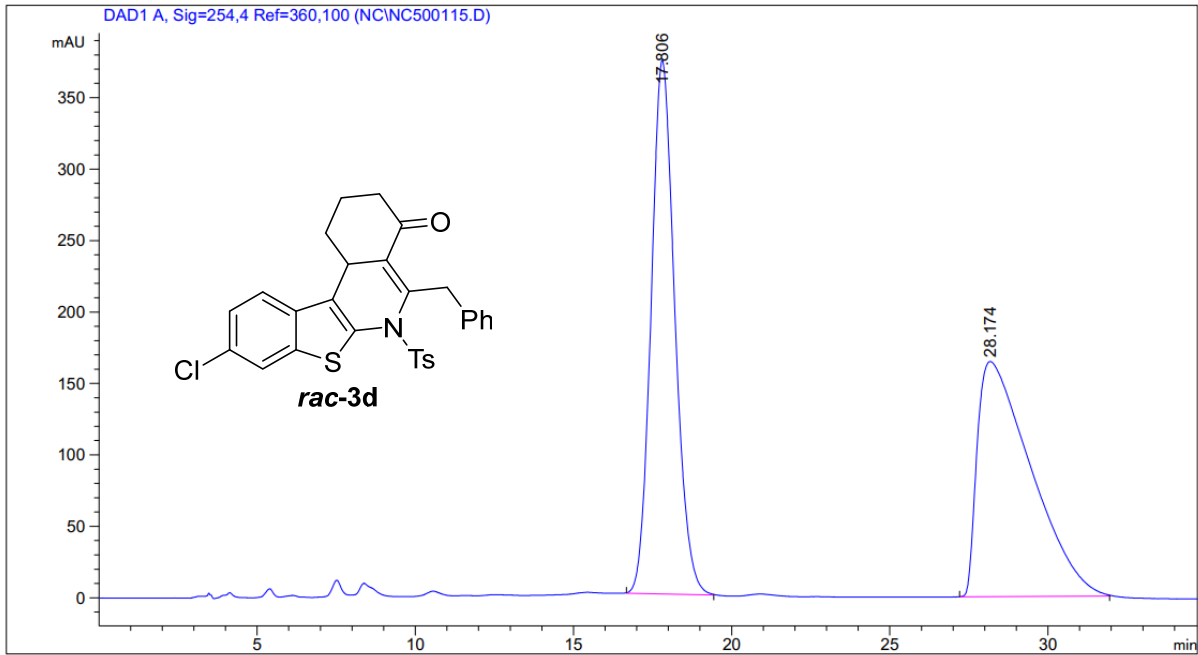

| Peak # | Ret Time [min] | Type | Width [min] | Area [mAU*s] | Height [mAU] | Area %  |
|--------|----------------|------|-------------|--------------|--------------|---------|
| 1      | 17.806         | BB   | 0.7917      | 1.94642e4    | 373.65070    | 50.0668 |
| 2      | 28.174         | BB   | 1.6010      | 1.94123e4    | 164.47571    | 49.9332 |

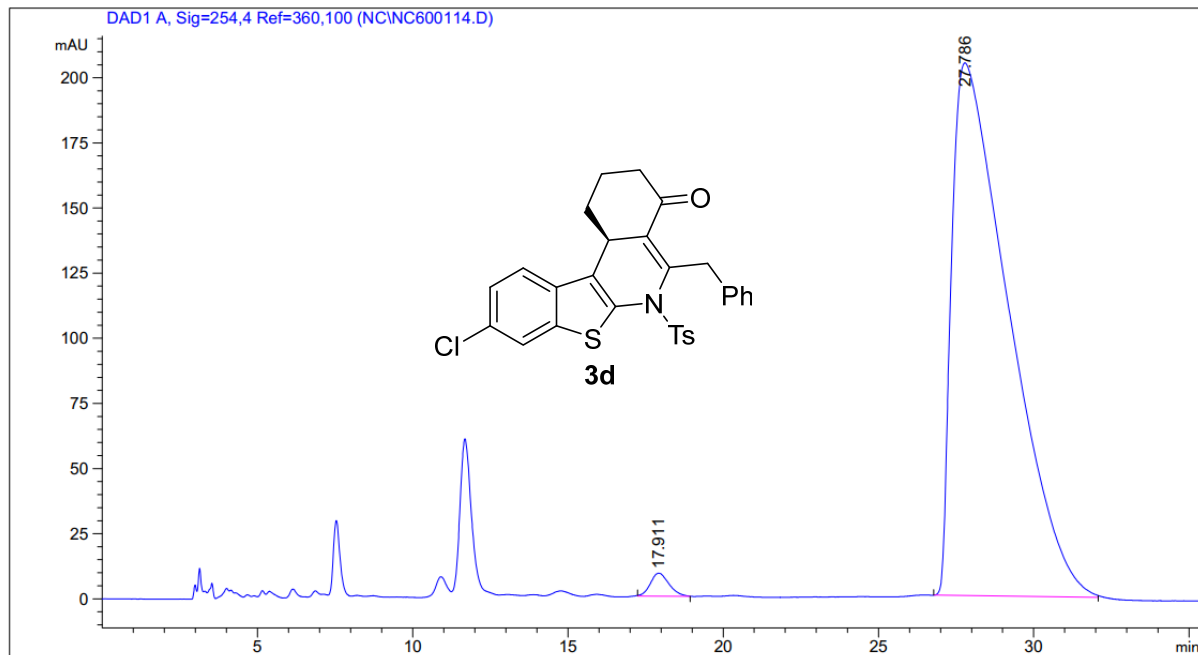

| Peak # | Ret Time [min] | Type | Width [min] | Area [mAU*s] | Height [mAU] | Area %  |
|--------|----------------|------|-------------|--------------|--------------|---------|
| 1      | 17.911         | BB   | 0.6099      | 369.92270    | 8.84541      | 1.4025  |
| 2      | 27.786         | BB   | 1.7238      | 2.60052e4    | 204.46992    | 98.5975 |

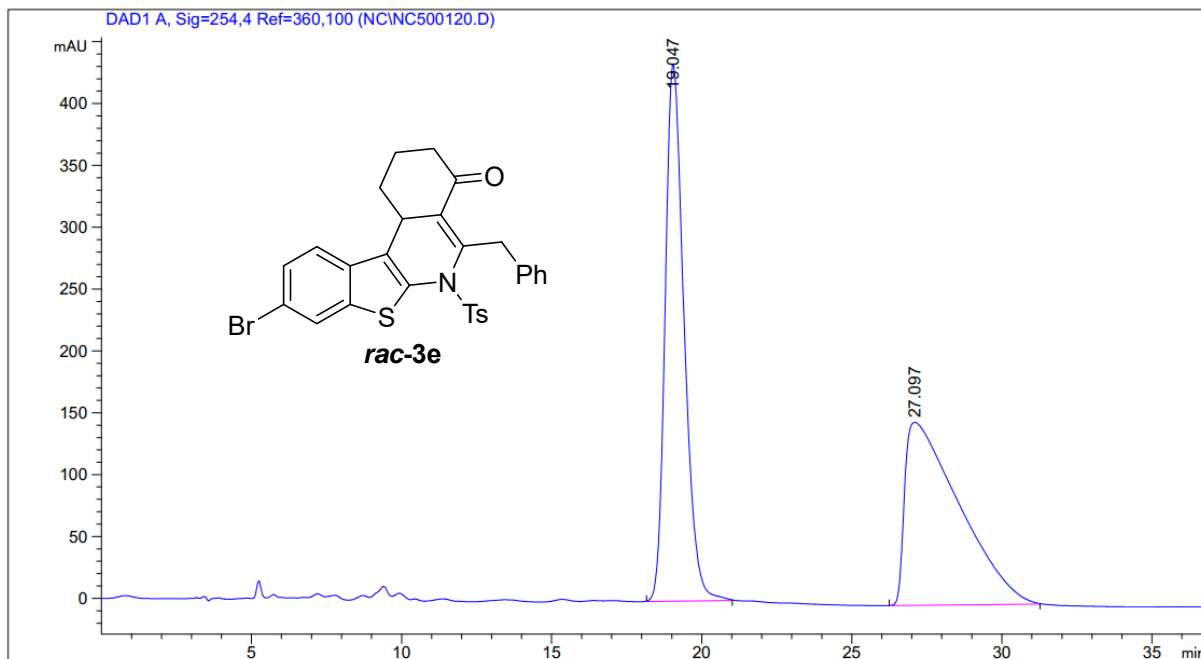

| Peak # | Ret Time [min] | Type | Width [min] | Area [mAU*s] | Height [mAU] | Area %  |
|--------|----------------|------|-------------|--------------|--------------|---------|
| 1      | 19.048         | VB   | 0.6778      | 1.91224e4    | 434.23917    | 50.2235 |
| 2      | 27.098         | BB   | 1.8037      | 1.89522e4    | 148.22449    | 49.7765 |

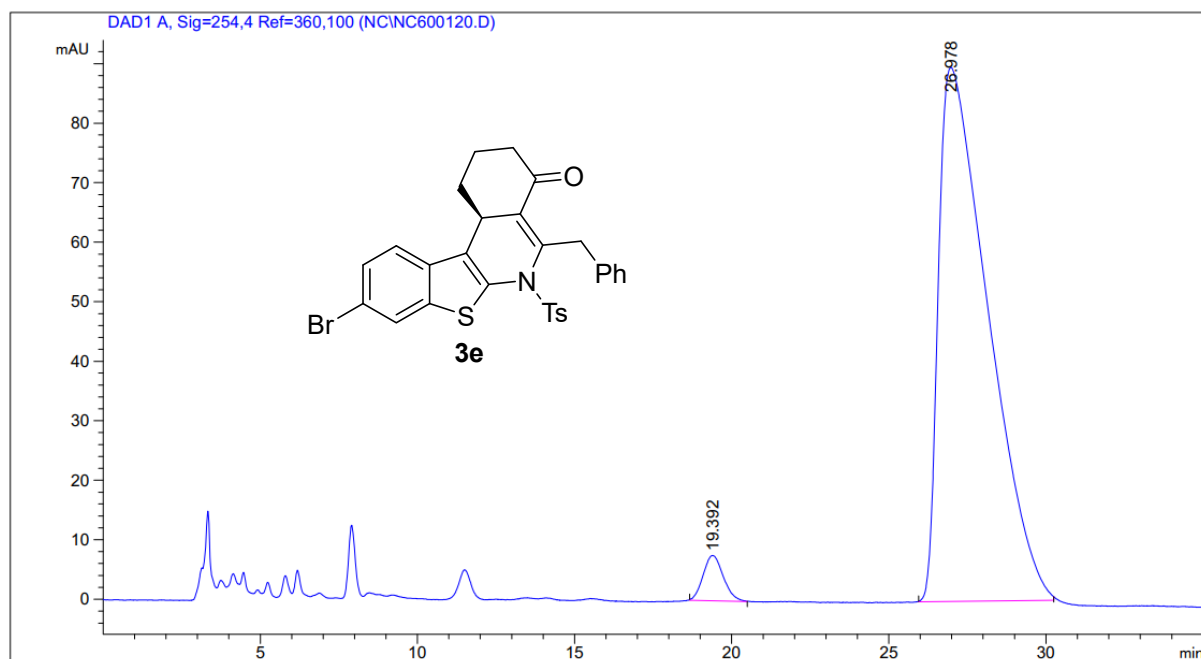

| Peak # | Ret Time [min] | Type | Width [min] | Area [mAU*s] | Height [mAU] | Area %  |
|--------|----------------|------|-------------|--------------|--------------|---------|
| 1      | 19.390         | BB   | 0.6953      | 351.74835    | 7.72446      | 3.4238  |
| 2      | 26.978         | BB   | 1.5419      | 9921.93262   | 90.02073     | 96.5762 |

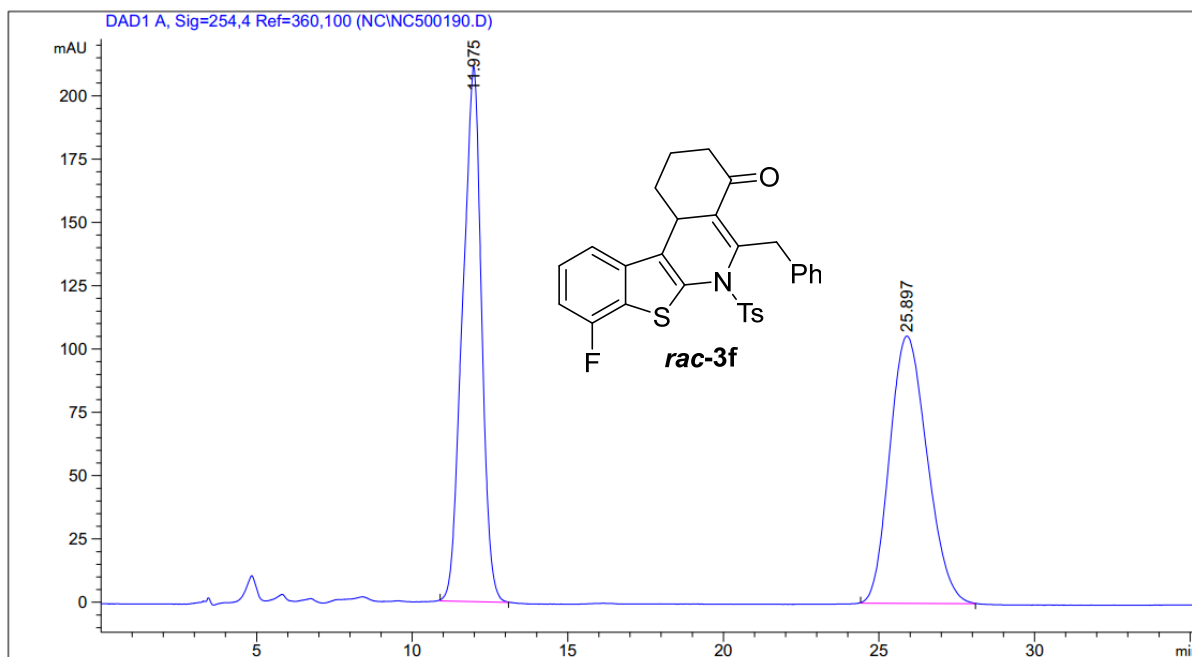

| Peak # | Ret Time [min] | Type | Width [min] | Area [mAU*s] | Height [mAU] | Area %  |
|--------|----------------|------|-------------|--------------|--------------|---------|
| 1      | 11.974         | BB   | 0.6107      | 9078.32129   | 212.38124    | 50.4604 |
| 2      | 25.897         | BB   | 1.3219      | 8912.66602   | 105.89657    | 49.5396 |

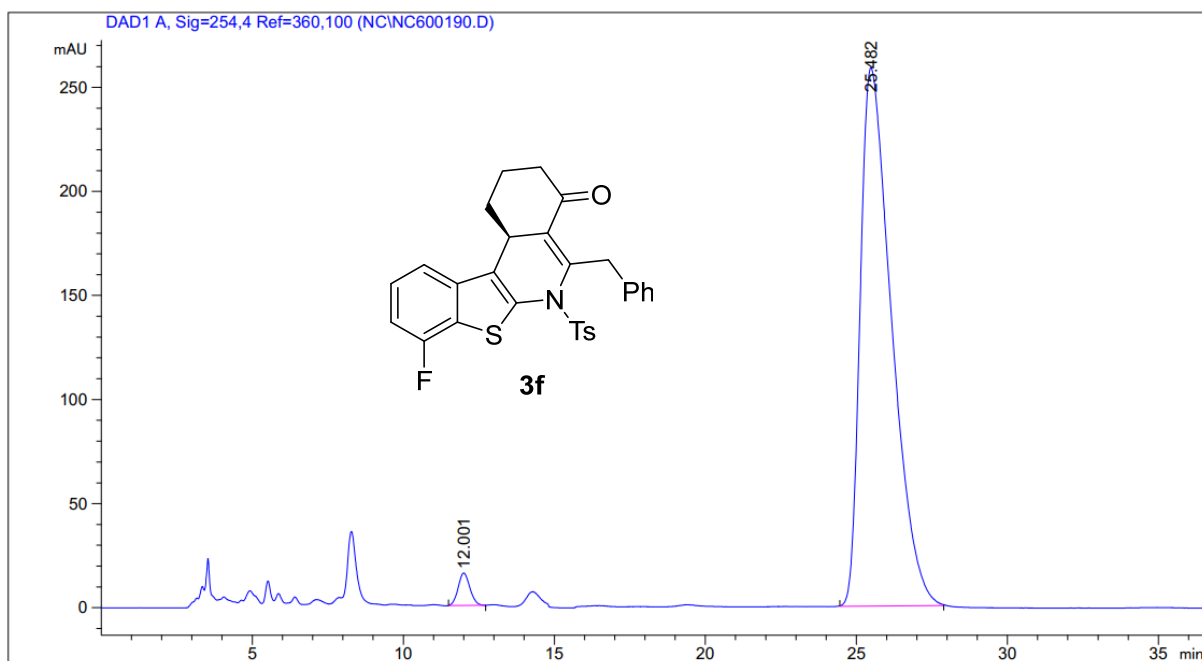

| Peak # | Ret Time [min] | Type | Width [min] | Area [mAU*s] | Height [mAU] | Area %  |
|--------|----------------|------|-------------|--------------|--------------|---------|
| 1      | 12.001         | VB   | 0.4389      | 461.79385    | 16.08665     | 2.4092  |
| 2      | 25.483         | BB   | 1.0901      | 1.87061e4    | 259.15417    | 97.5908 |

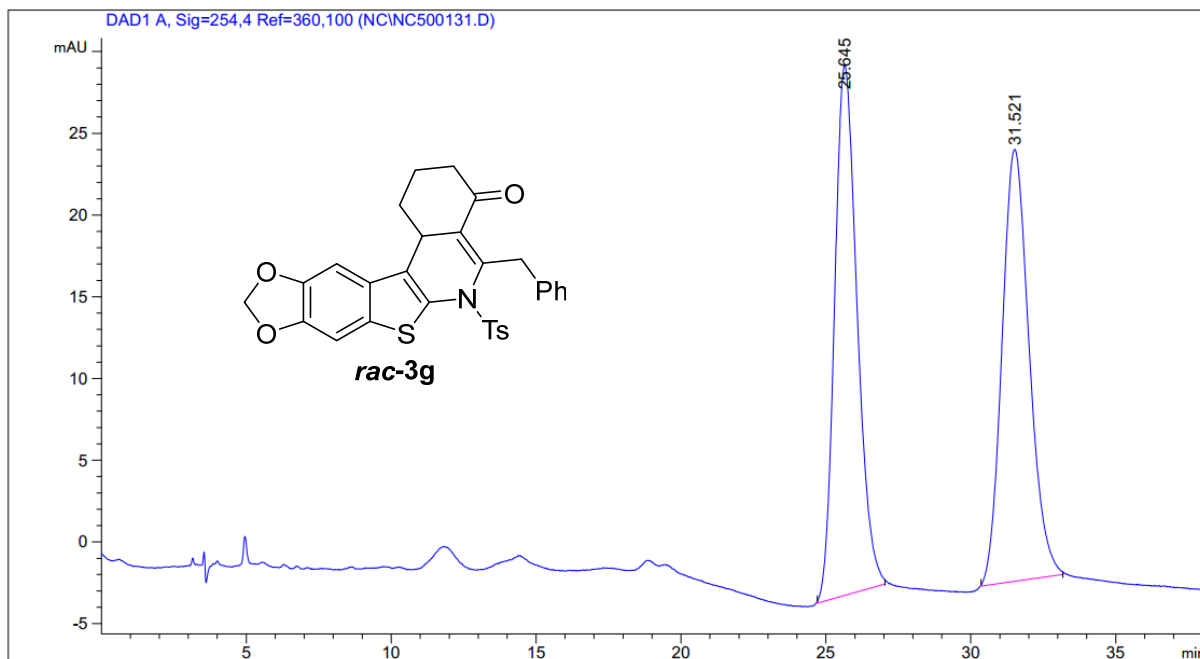

| Peak # | Ret Time [min] | Type | Width [min] | Area [mAU*s] | Height [mAU] | Area %  |
|--------|----------------|------|-------------|--------------|--------------|---------|
| 1      | 25.645         | BB   | 0.8399      | 1791.58984   | 32.66412     | 50.2714 |
| 2      | 31.516         | BB   | 1.0060      | 1772.24634   | 26.71290     | 49.7286 |

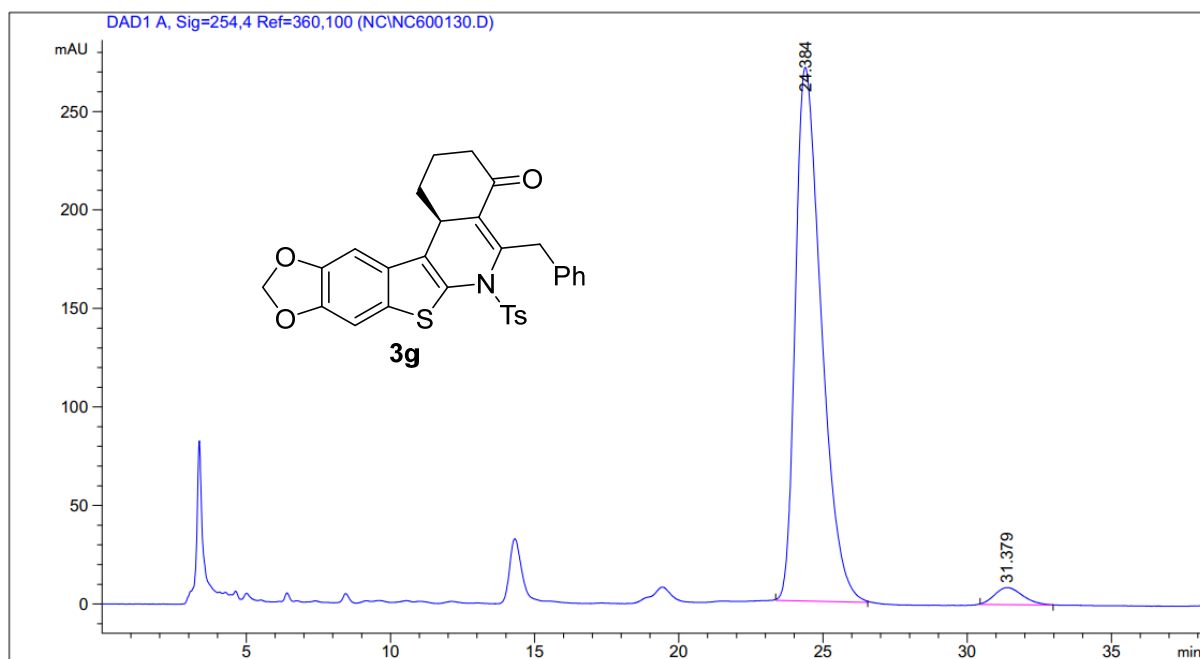

| Peak # | Ret Time [min] | Type | Width [min] | Area [mAU*s] | Height [mAU] | Area %  |
|--------|----------------|------|-------------|--------------|--------------|---------|
| 1      | 24.384         | BB   | 0.9651      | 1.70544e4    | 271.39017    | 96.4119 |
| 2      | 31.387         | BB   | 1.0575      | 634.69312    | 8.97005      | 3.5881  |

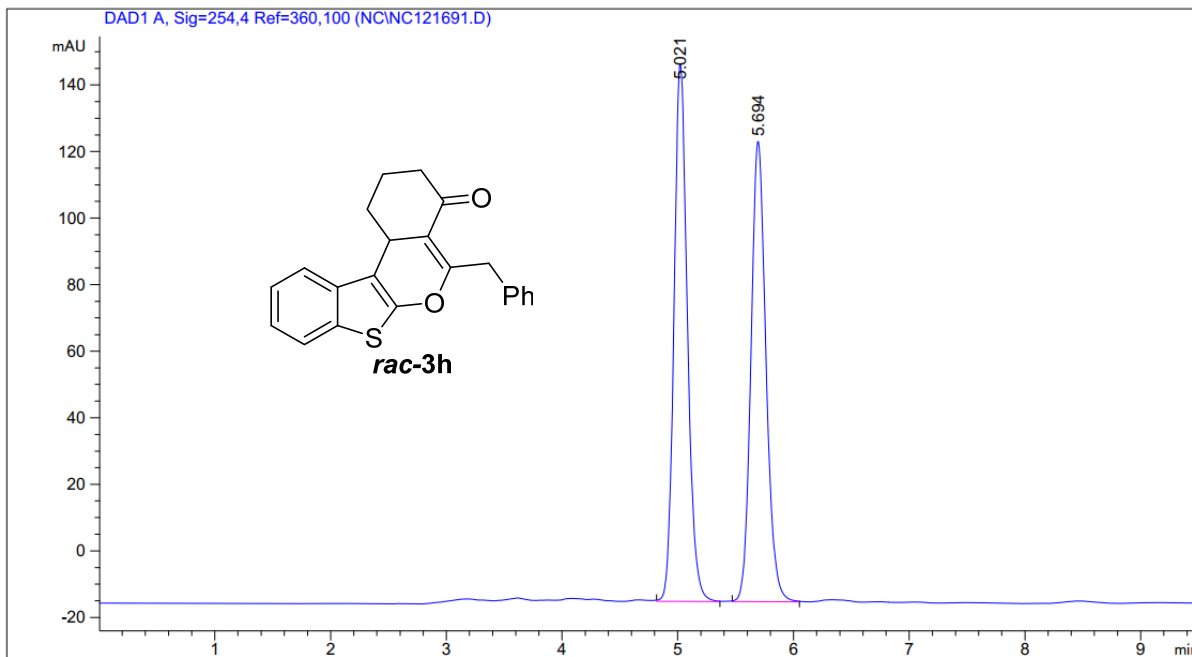

| Peak # | Ret Time [min] | Type | Width [min] | Area [mAU*s] | Height [mAU] | Area %  |
|--------|----------------|------|-------------|--------------|--------------|---------|
| 1      | 5.021          | BB   | 0.1218      | 1299.69116   | 161.65872    | 51.0383 |
| 2      | 5.694          | BB   | 0.1370      | 1246.80908   | 138.52023    | 48.9617 |

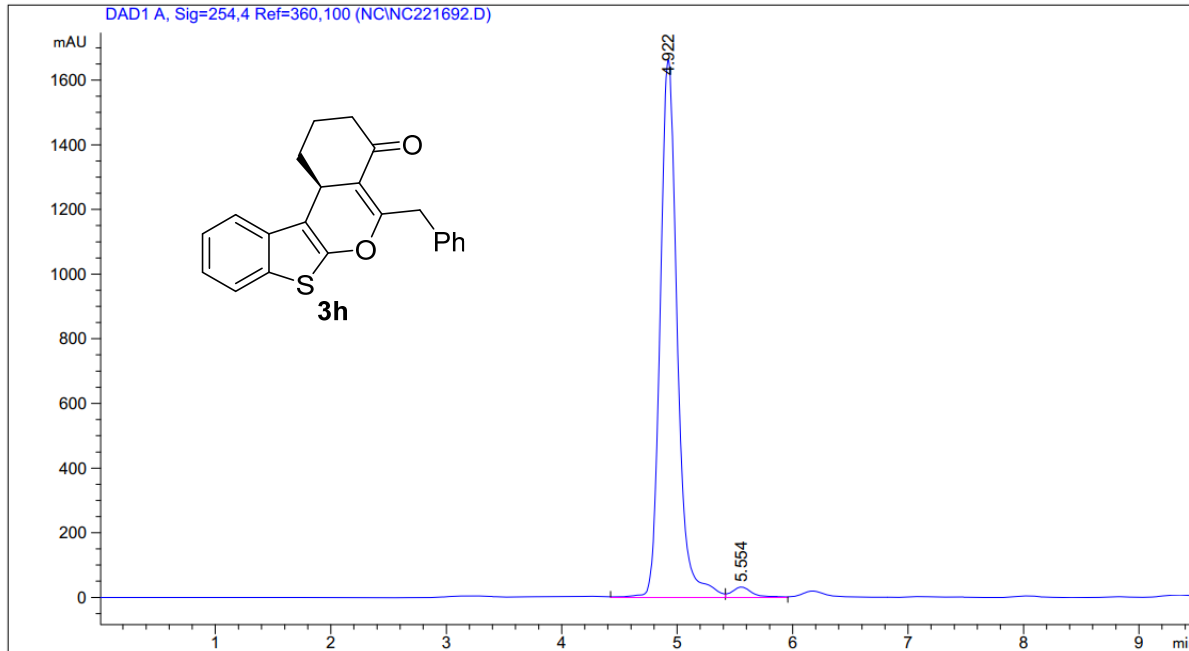

| Peak # | Ret Time [min] | Type | Width [min] | Area [mAU*s] | Height [mAU] | Area %  |
|--------|----------------|------|-------------|--------------|--------------|---------|
| 1      | 4.922          | VV   | 0.1562      | 1.71428e4    | 1664.23840   | 97.7626 |
| 2      | 5.554          | VV   | 0.1803      | 392.33682    | 32.17044     | 2.2374  |

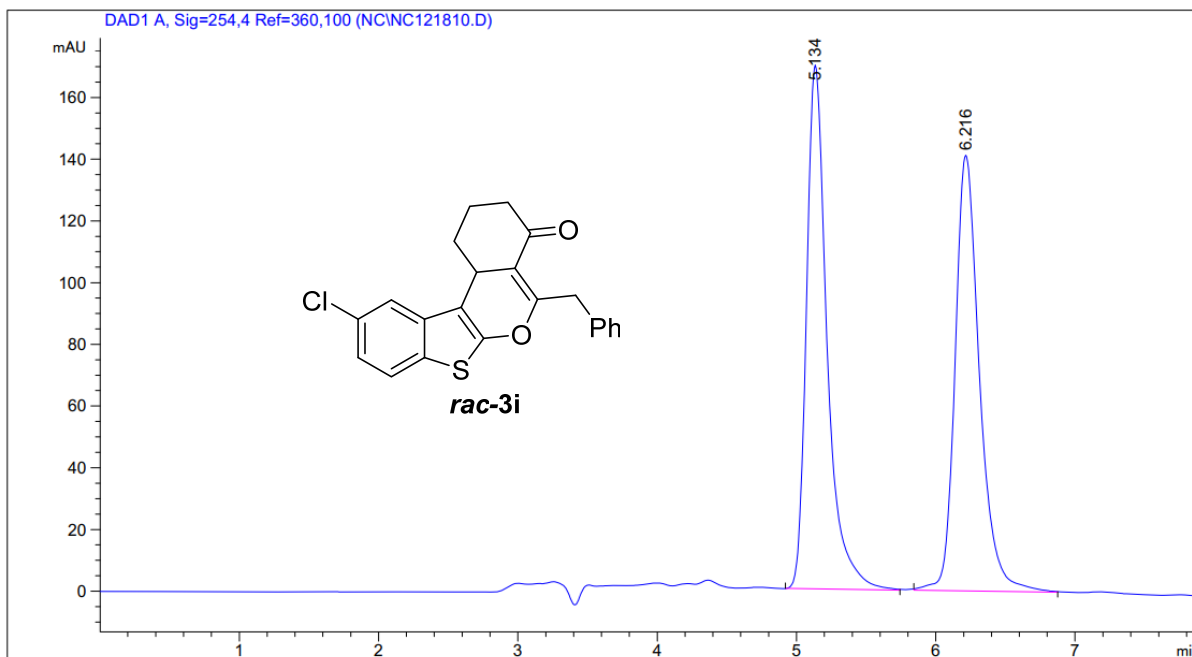

| Peak # | Ret Time [min] | Type | Width [min] | Area [mAU*s] | Height [mAU] | Area %  |
|--------|----------------|------|-------------|--------------|--------------|---------|
| 1      | 5.134          | BB   | 0.1537      | 1741.61780   | 169.78145    | 50.2464 |
| 2      | 6.216          | BB   | 0.1844      | 1724.53809   | 141.25587    | 49.7536 |

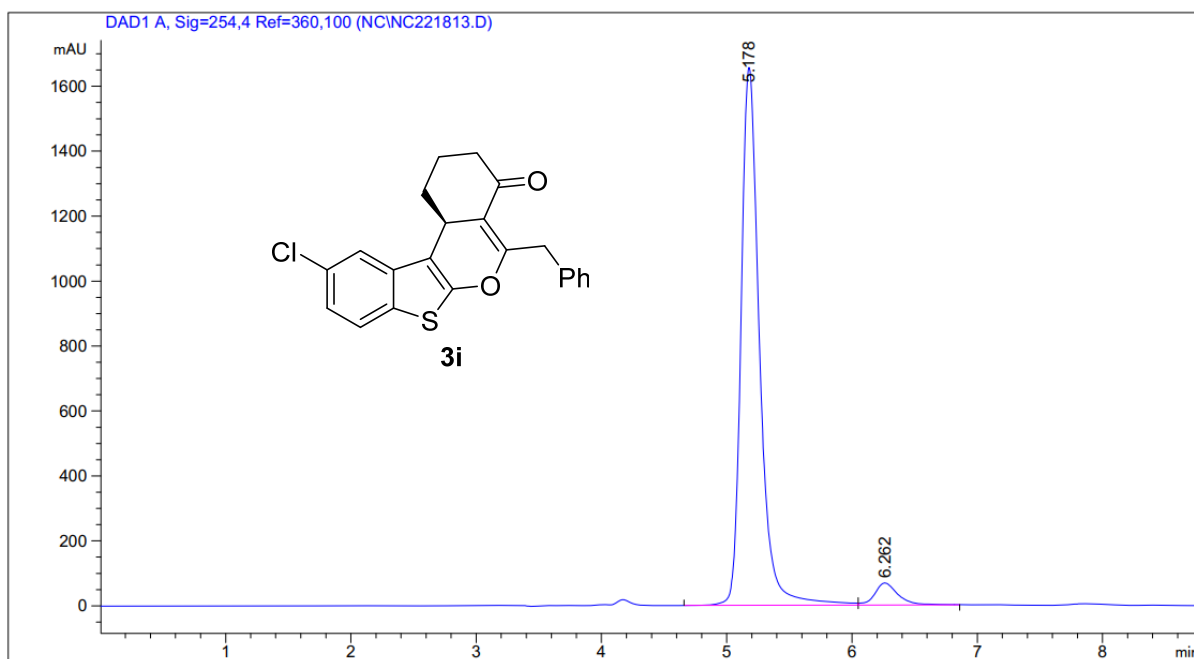

| Peak # | Ret Time [min] | Type | Width [min] | Area [mAU*s] | Height [mAU] | Area %  |
|--------|----------------|------|-------------|--------------|--------------|---------|
| 1      | 5.178          | BV   | 0.1555      | 1.69698e4    | 1656.41589   | 95.0918 |
| 2      | 6.262          | VB   | 0.1899      | 875.89337    | 68.17248     | 4.9082  |

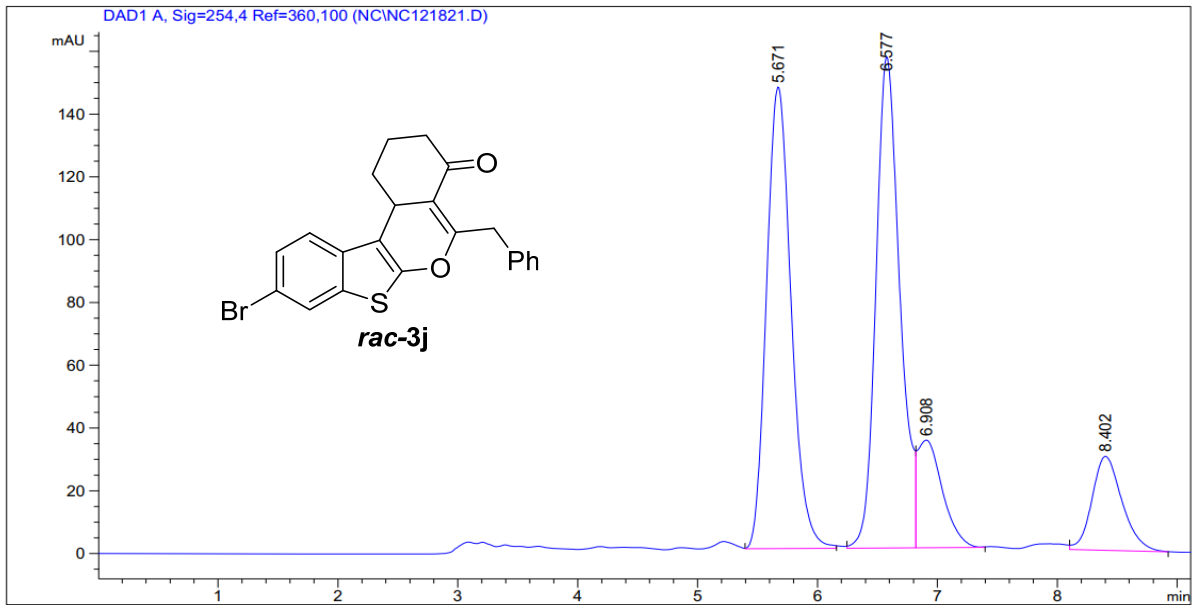

| Peak # | Ret Time [min] | Type | Width [min] | Area [mAU*s] | Height [mAU] | Area %  |
|--------|----------------|------|-------------|--------------|--------------|---------|
| 1      | 5.671          | VB   | 0.2229      | 2104.55420   | 147.09618    | 39.7631 |
| 2      | 6.577          | BV   | 0.2099      | 2170.59033   | 156.37476    | 41.0108 |
| 3      | 6.908          | VB   | 0.2139      | 493.37512    | 34.28854     | 9.3218  |
| 4      | 8.402          | VB   | 0.2639      | 524.20593    | 29.98767     | 9.9043  |

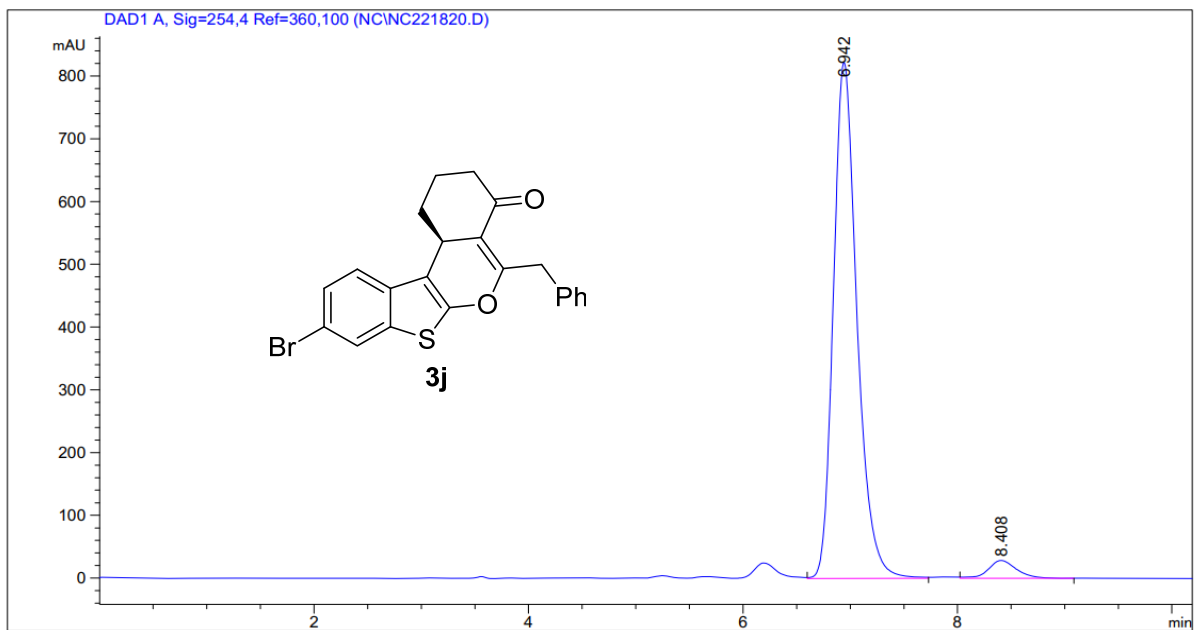

| Peak # | Ret Time [min] | Type | Width [min] | Area [mAU*s] | Height [mAU] | Area %  |
|--------|----------------|------|-------------|--------------|--------------|---------|
| 1      | 6.942          | VV   | 0.2306      | 1.25774e4    | 821.54590    | 95.9941 |
| 2      | 8.408          | VB   | 0.2749      | 524.85846    | 28.49740     | 4.0059  |

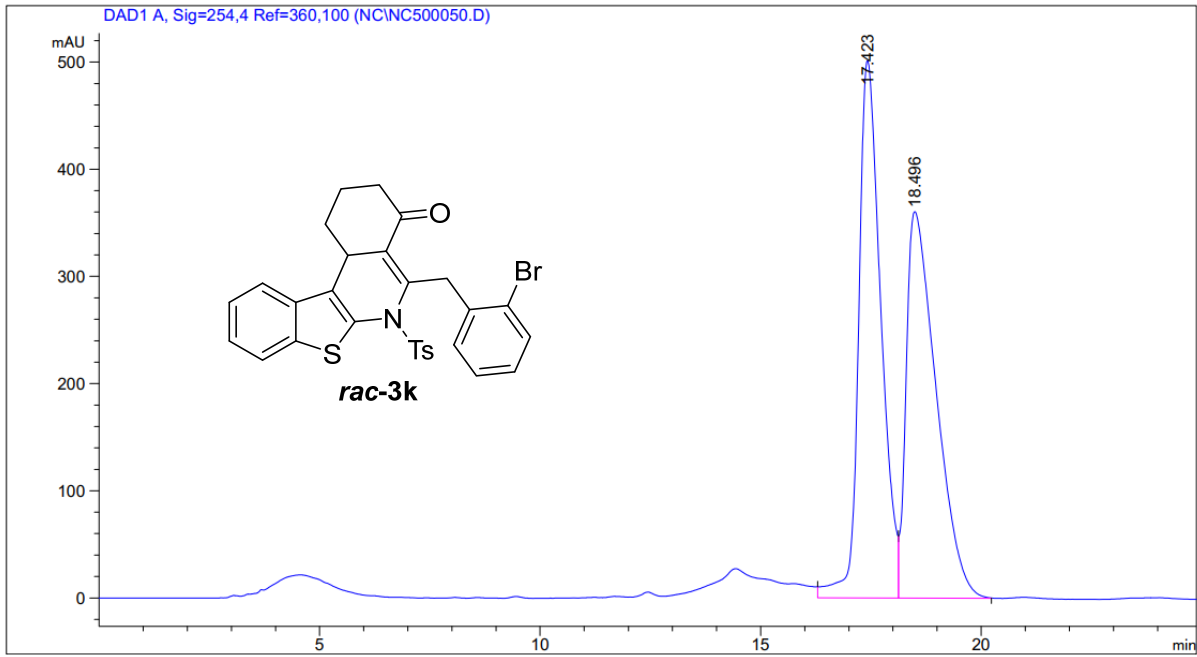

| Peak # | Ret Time [min] | Type | Width [min] | Area [mAU*s] | Height [mAU] | Area %  |
|--------|----------------|------|-------------|--------------|--------------|---------|
| 1      | 17.423         | VV   | 0.5344      | 1.76385e4    | 501.44711    | 50.9845 |
| 2      | 18.496         | VB   | 0.6967      | 1.69573e4    | 360.54755    | 49.0155 |

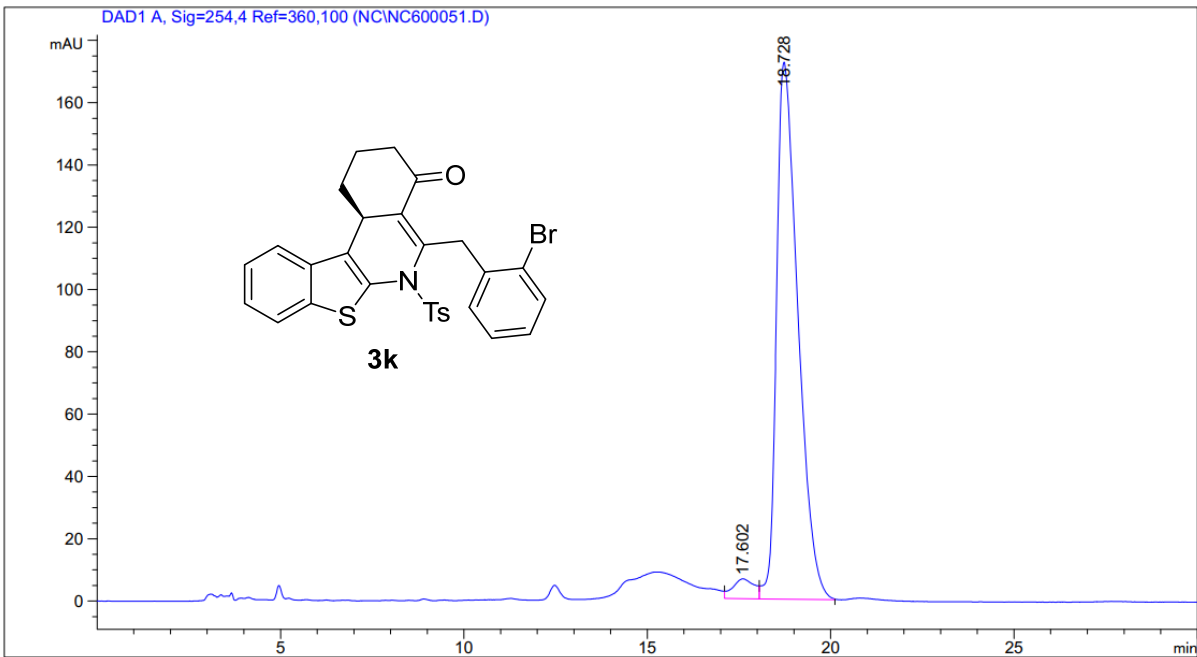

| Peak # | Ret Time [min] | Type | Width [min] | Area [mAU*s] | Height [mAU] | Area %  |
|--------|----------------|------|-------------|--------------|--------------|---------|
| 1      | 17.602         | VV   | 0.5203      | 260.61136    | 6.35661      | 3.5886  |
| 2      | 18.728         | VB   | 0.6159      | 7001.69092   | 172.38318    | 96.4114 |



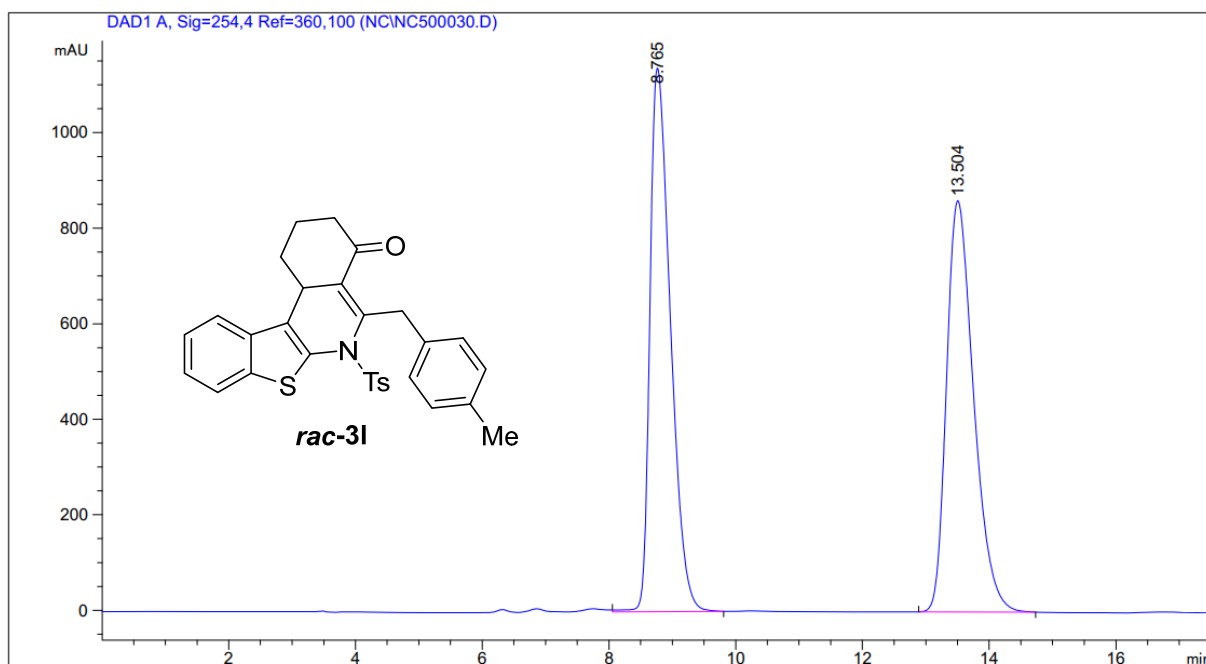

| Peak # | Ret Time [min] | Type | Width [min] | Area [mAU*s] | Height [mAU] | Area %  |
|--------|----------------|------|-------------|--------------|--------------|---------|
| 1      | 8.765          | VB   | 0.3460      | 2.55532e4    | 1138.01672   | 49.9604 |
| 2      | 13.504         | BB   | 0.4568      | 2.55937e4    | 861.04077    | 50.0396 |

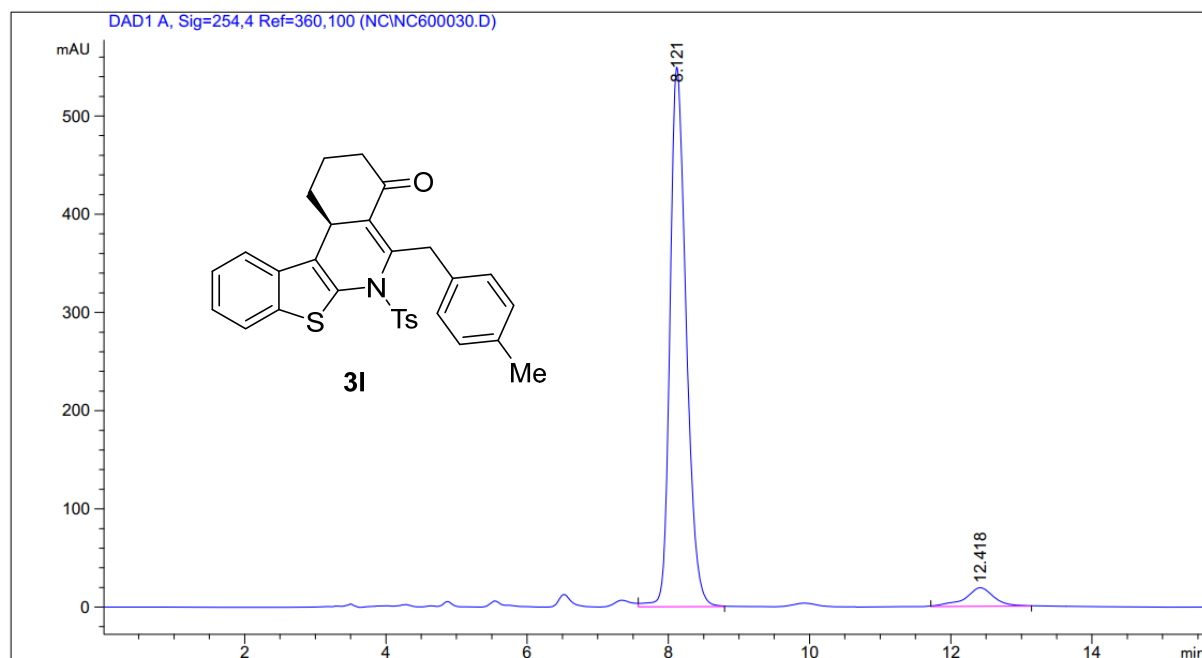

| Peak # | Ret Time [min] | Type | Width [min] | Area [mAU*s] | Height [mAU] | Area %  |
|--------|----------------|------|-------------|--------------|--------------|---------|
| 1      | 8.121          | VB   | 0.2441      | 8763.08691   | 549.45947    | 94.1448 |
| 2      | 12.418         | BB   | 0.4216      | 545.01123    | 19.05851     | 5.8552  |

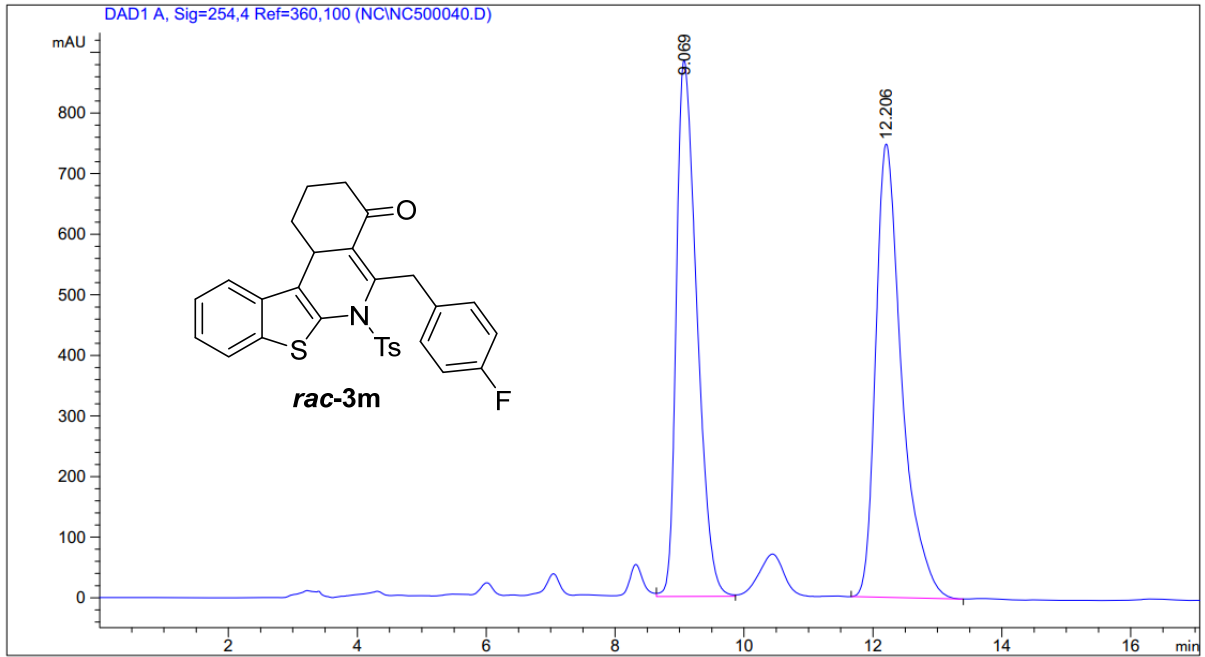

| Peak # | Ret Time [min] | Type | Width [min] | Area [mAU*s] | Height [mAU] | Area %  |
|--------|----------------|------|-------------|--------------|--------------|---------|
| 1      | 9.069          | VV   | 0.3399      | 1.95717e4    | 885.35956    | 48.1288 |
| 2      | 12.206         | BB   | 0.4228      | 2.10936e4    | 748.46857    | 51.8712 |

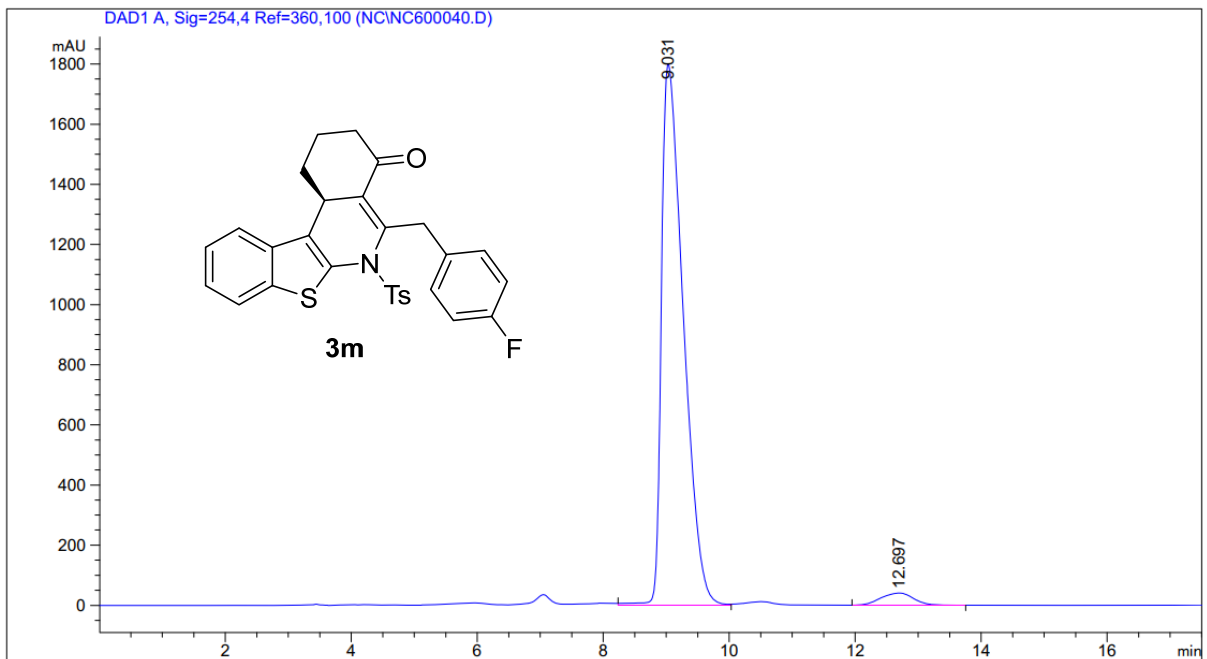

| Peak # | Ret Time [min] | Type | Width [min] | Area [mAU*s] | Height [mAU] | Area %  |
|--------|----------------|------|-------------|--------------|--------------|---------|
| 1      | 9.031          | VB   | 0.3685      | 4.32612e4    | 1799.34534   | 96.7553 |
| 2      | 12.697         | BB   | 0.5760      | 1450.75024   | 40.49120     | 3.2447  |

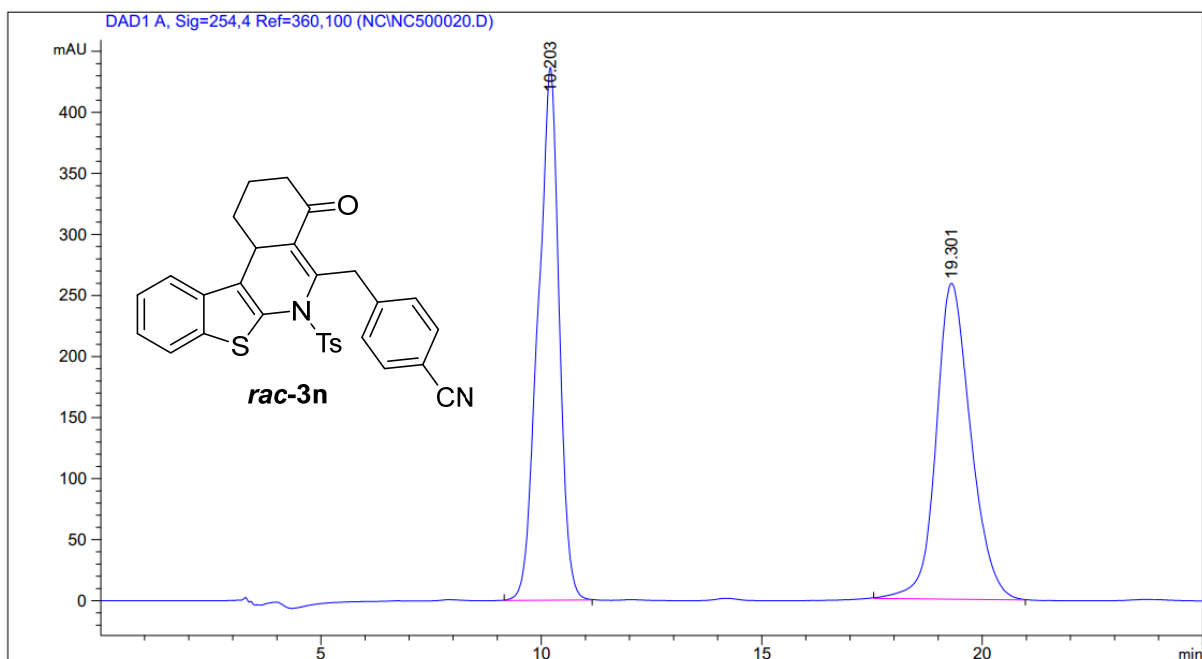

| Peak # | Ret Time [min] | Type | Width [min] | Area [mAU*s] | Height [mAU] | Area %  |
|--------|----------------|------|-------------|--------------|--------------|---------|
| 1      | 10.203         | BB   | 0.4712      | 1.44861e4    | 436.45602    | 50.5973 |
| 2      | 19.301         | BB   | 0.8259      | 1.41441e4    | 258.67941    | 49.4027 |

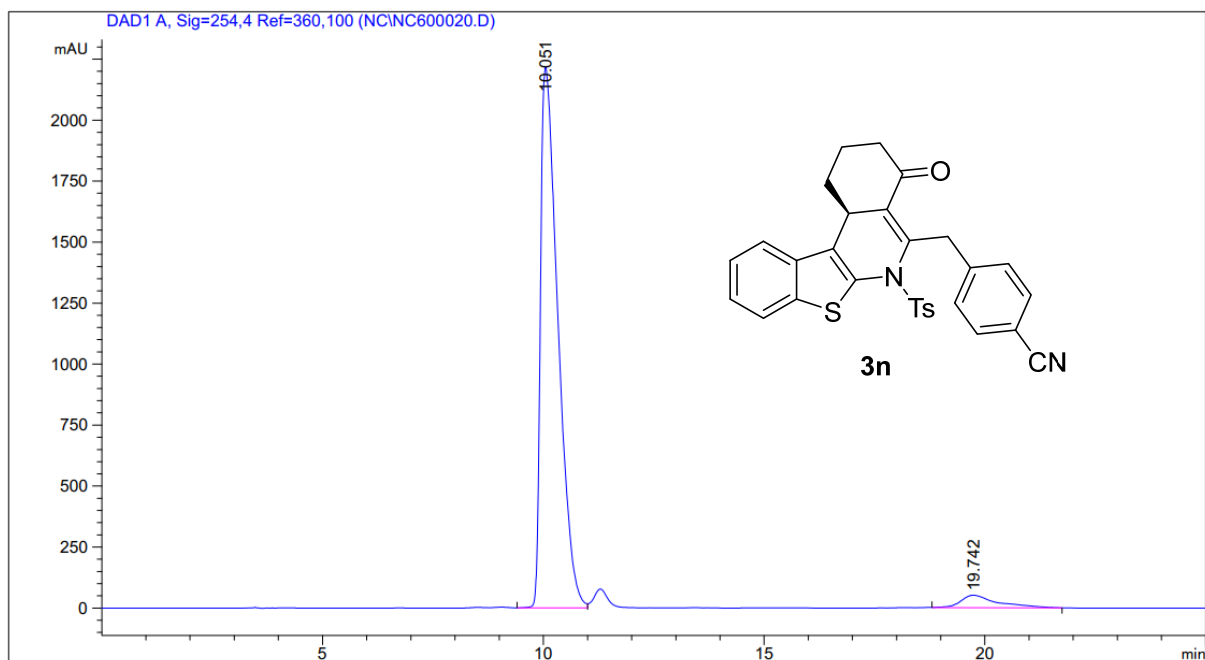

| Peak # | Ret Time [min] | Type | Width [min] | Area [mAU*s] | Height [mAU] | Area %  |
|--------|----------------|------|-------------|--------------|--------------|---------|
| 1      | 10.051         | VV   | 0.4152      | 6.06772e4    | 2217.78467   | 95.3733 |
| 2      | 19.742         | BB   | 0.8276      | 2943.52222   | 50.83016     | 4.6267  |

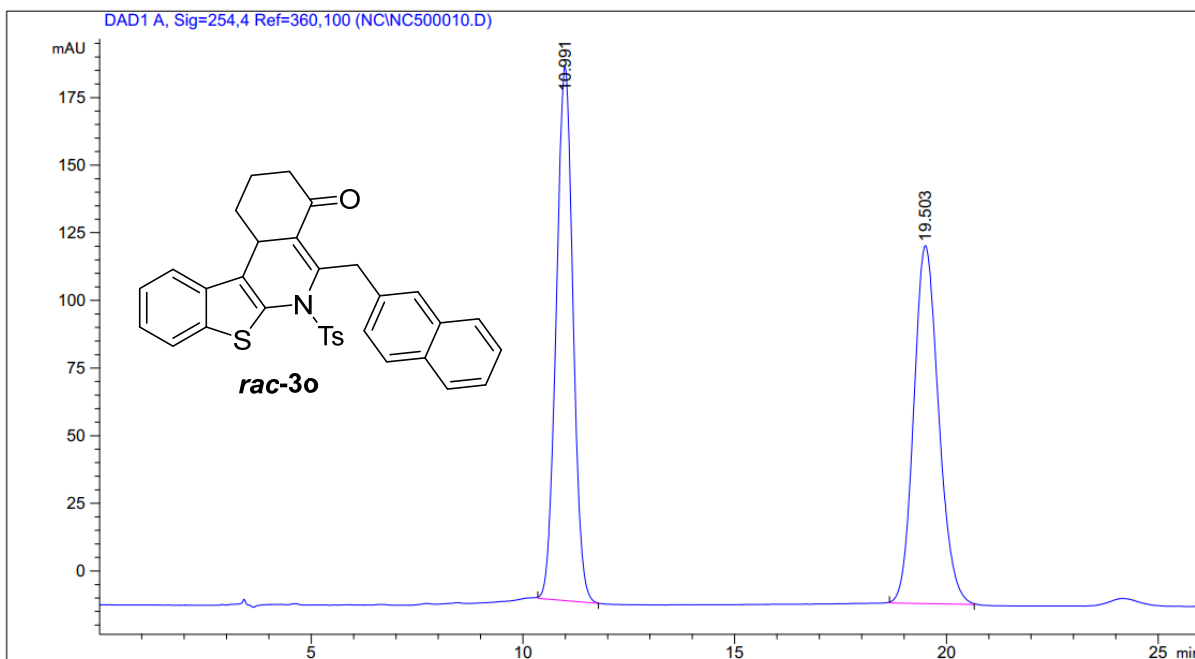

| Peak # | Ret Time [min] | Type | Width [min] | Area [mAU*s] | Height [mAU] | Area %  |
|--------|----------------|------|-------------|--------------|--------------|---------|
| 1      | 10.991         | BB   | 0.4238      | 5413.68359   | 197.48494    | 50.0157 |
| 2      | 19.503         | BB   | 0.6310      | 5410.29150   | 132.32932    | 49.9843 |

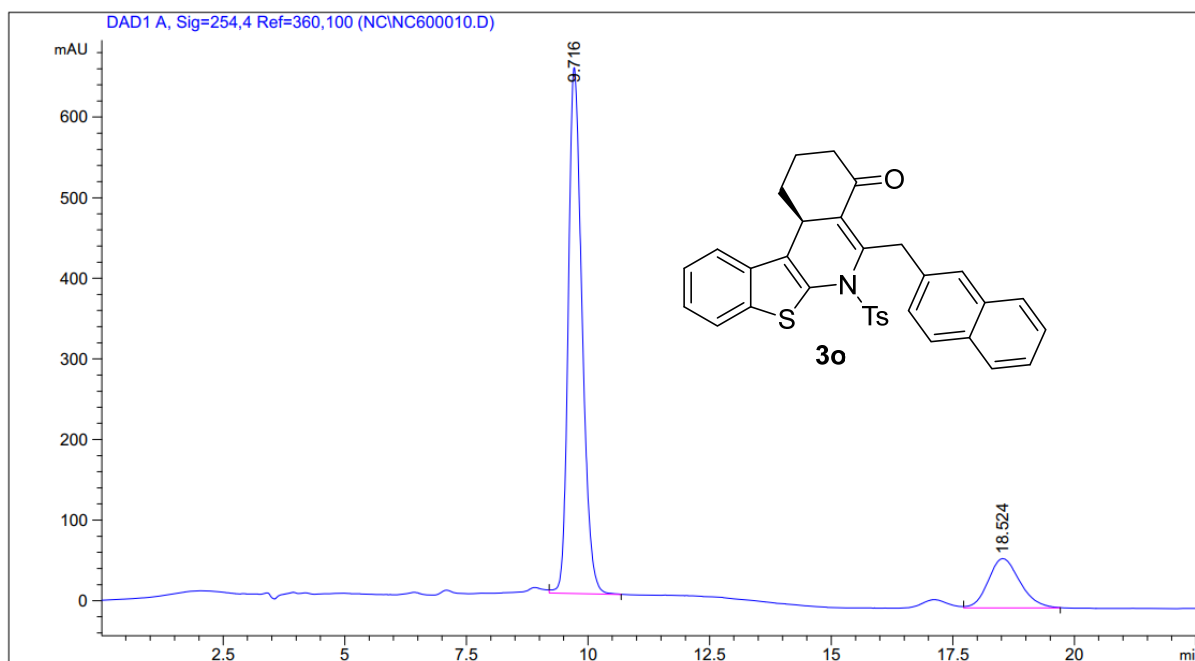

| Peak # | Ret Time [min] | Type | Width [min] | Area [mAU*s] | Height [mAU] | Area %  |
|--------|----------------|------|-------------|--------------|--------------|---------|
| 1      | 9.716          | VB   | 0.3037      | 1.28499e4    | 652.52502    | 82.2728 |
| 2      | 18.524         | VB   | 0.6763      | 2768.74194   | 61.36998     | 17.7272 |

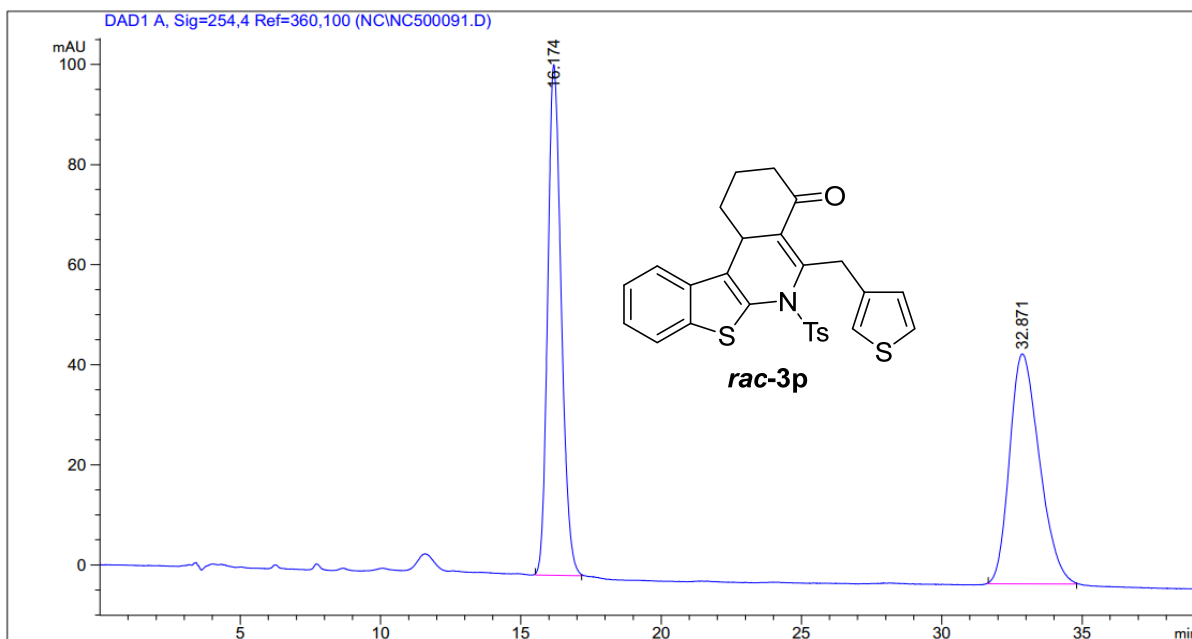

| Peak # | Ret Time [min] | Type | Width [min] | Area [mAU*s] | Height [mAU] | Area %  |
|--------|----------------|------|-------------|--------------|--------------|---------|
| 1      | 16.174         | BB   | 0.5174      | 3445.19873   | 102.17159    | 49.8729 |
| 2      | 32.871         | BB   | 1.1493      | 3462.75854   | 46.25859     | 50.1271 |

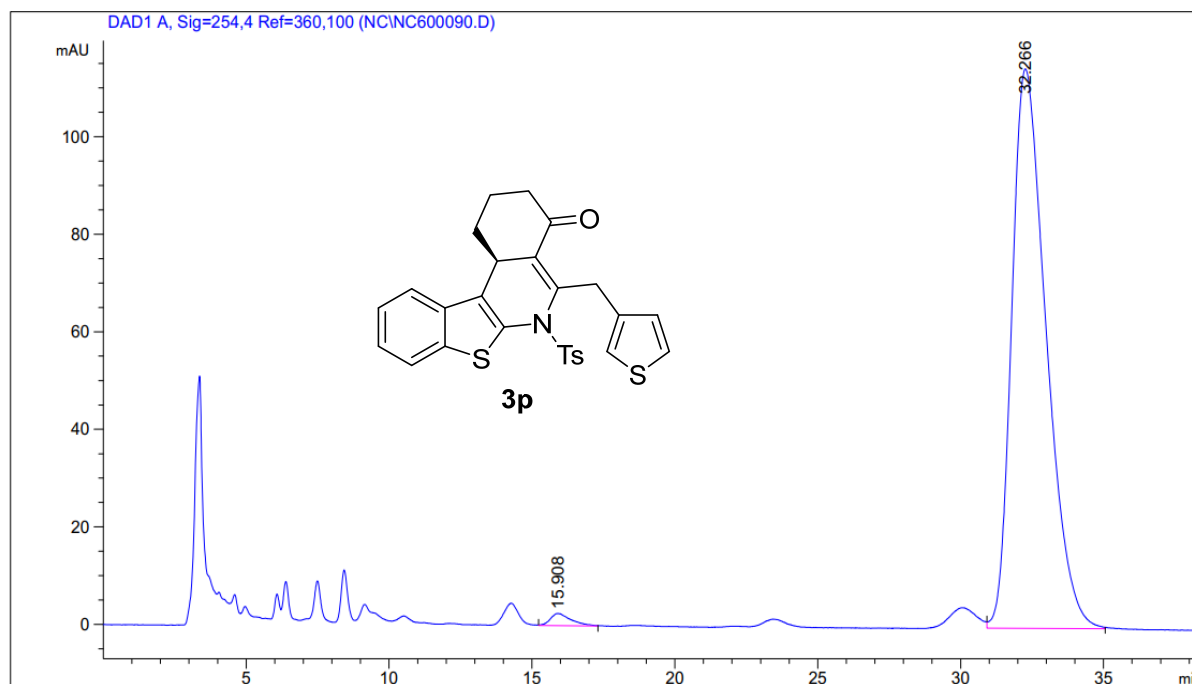

| Peak # | Ret Time [min] | Type | Width [min] | Area [mAU*s] | Height [mAU] | Area %  |
|--------|----------------|------|-------------|--------------|--------------|---------|
| 1      | 15.908         | BB   | 0.7194      | 128.85866    | 2.50812      | 1.3268  |
| 2      | 32.266         | VB   | 1.2867      | 9583.40527   | 114.71129    | 98.6732 |

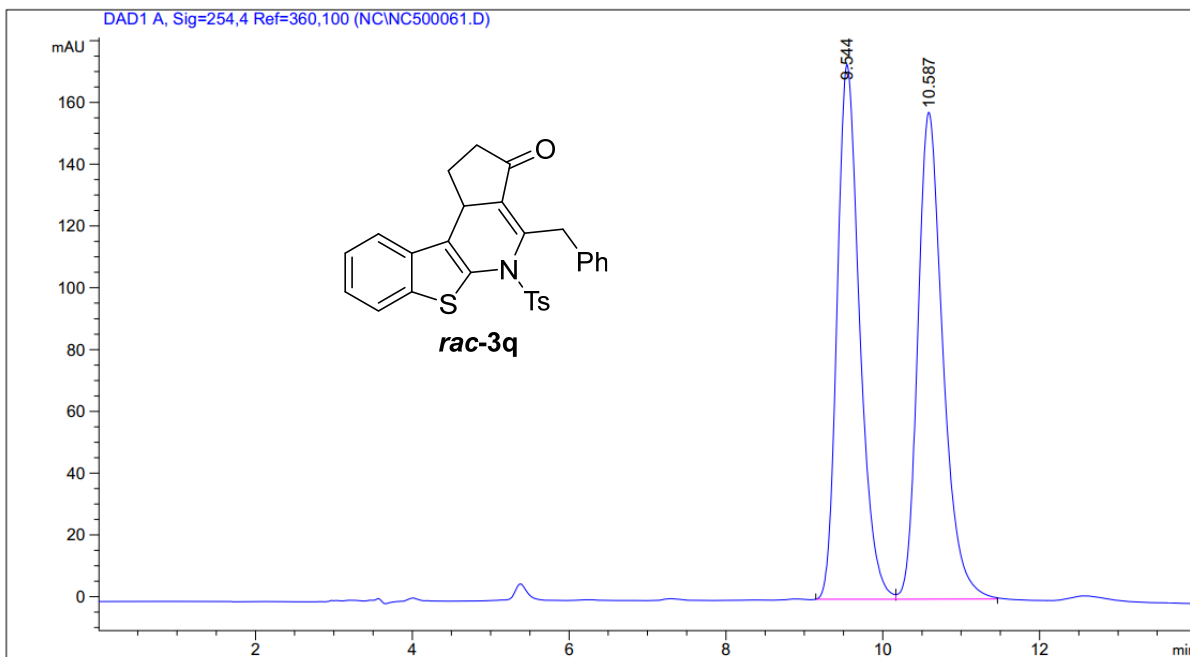

| Peak # | Ret Time [min] | Type | Width [min] | Area [mAU*s] | Height [mAU] | Area %  |
|--------|----------------|------|-------------|--------------|--------------|---------|
| 1      | 9.544          | BV   | 0.3039      | 3441.21875   | 173.10561    | 49.5217 |
| 2      | 10.587         | VB   | 0.3375      | 3507.69312   | 157.67346    | 50.4783 |

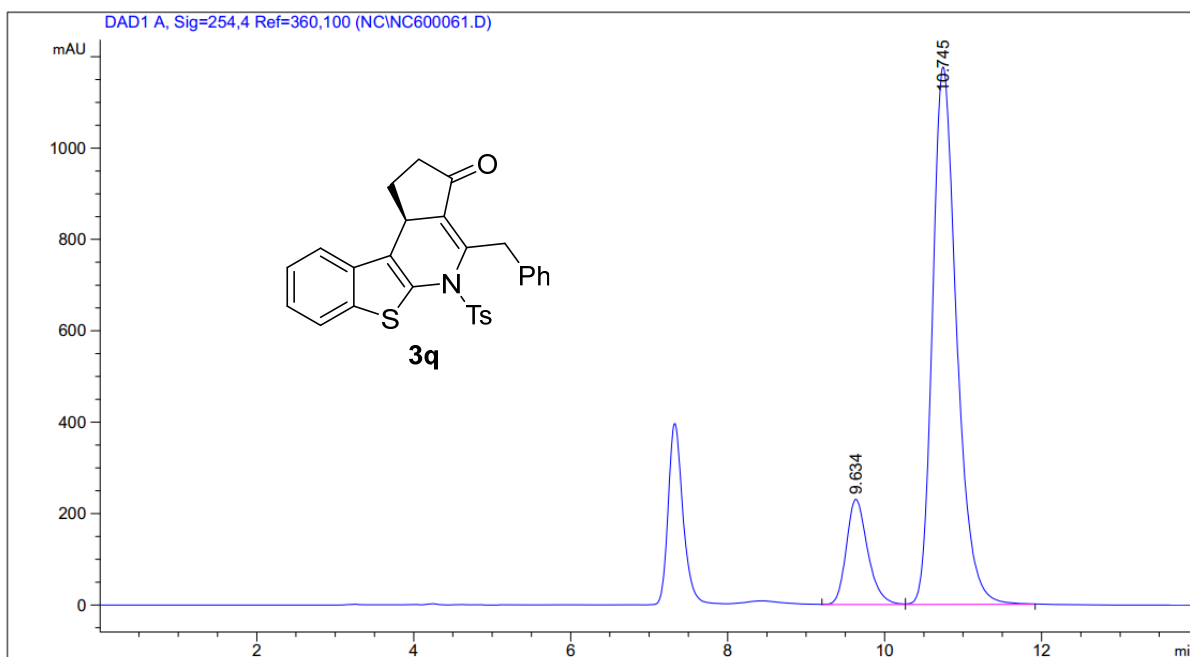

| Peak # | Ret Time [min] | Type | Width [min] | Area [mAU*s] | Height [mAU] | Area %  |
|--------|----------------|------|-------------|--------------|--------------|---------|
| 1      | 9.634          | VV   | 0.2880      | 4350.32080   | 230.64670    | 14.7720 |
| 2      | 10.745         | VB   | 0.3269      | 2.50995e4    | 1176.33289   | 85.2280 |

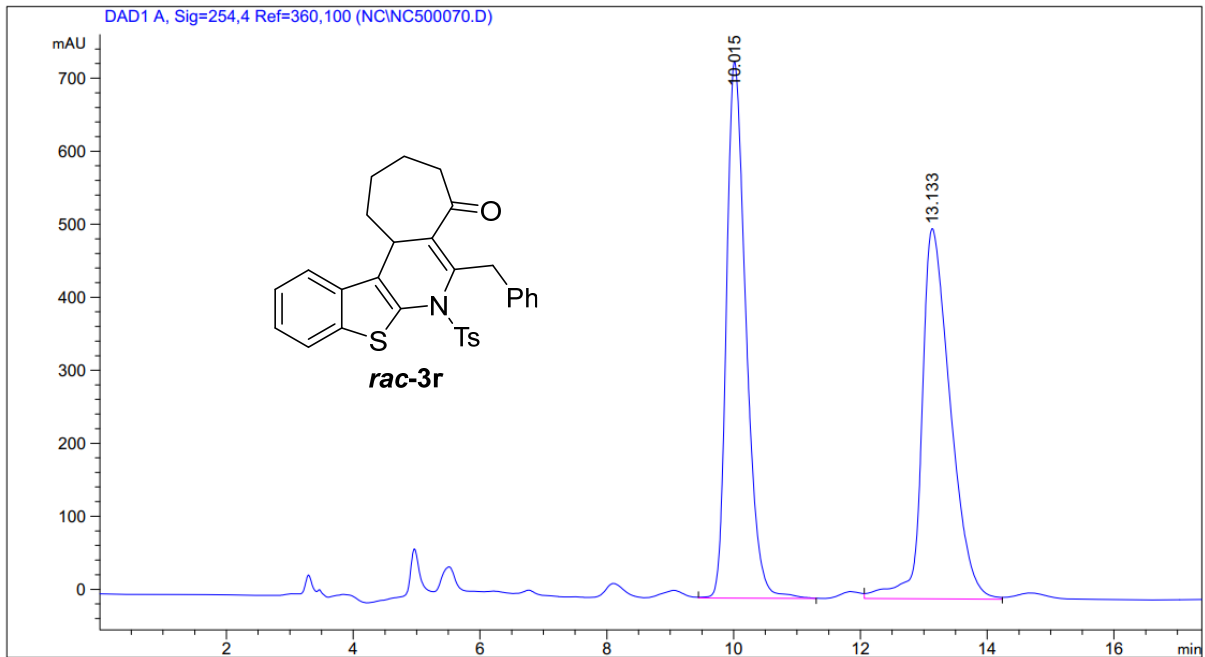

| Peak # | Ret Time [min] | Type | Width [min] | Area [mAU*s] | Height [mAU] | Area %  |
|--------|----------------|------|-------------|--------------|--------------|---------|
| 1      | 10.015         | VB   | 0.3264      | 1.56451e4    | 734.69482    | 49.6913 |
| 2      | 13.133         | VB   | 0.4743      | 1.58395e4    | 507.19946    | 50.3087 |

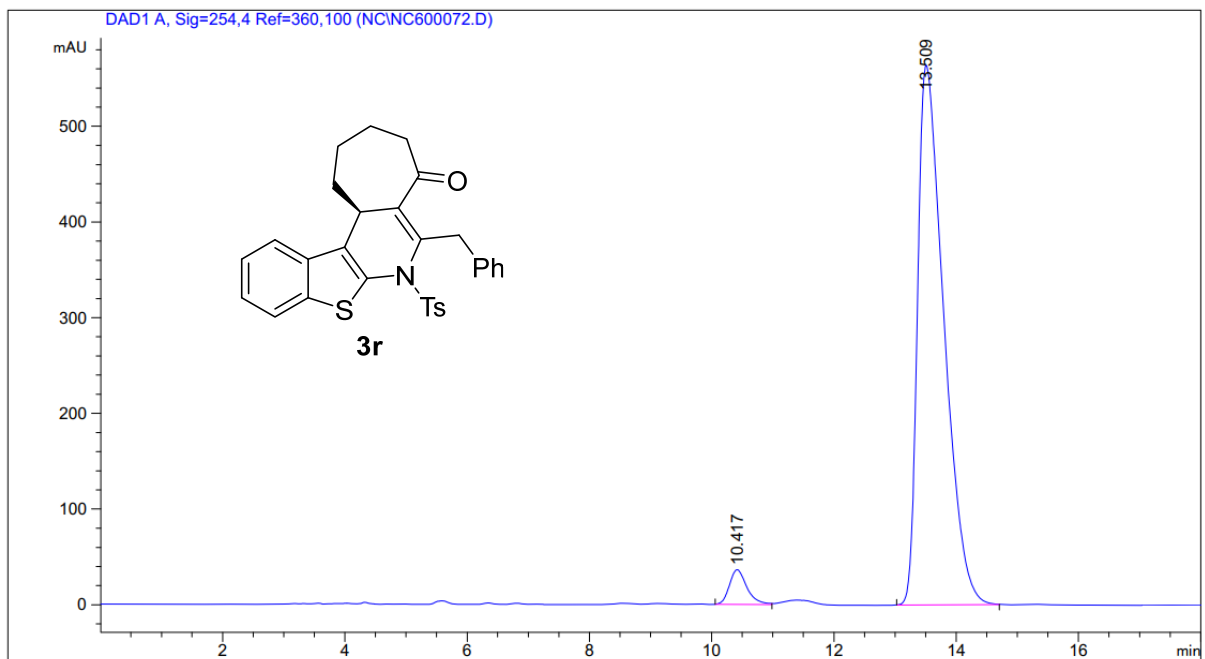

| Peak # | Ret Time [min] | Type | Width [min] | Area [mAU*s] | Height [mAU] | Area %  |
|--------|----------------|------|-------------|--------------|--------------|---------|
| 1      | 10.417         | BB   | 0.3022      | 724.33057    | 36.40049     | 4.1407  |
| 2      | 13.509         | BB   | 0.4488      | 1.67687e4    | 564.10706    | 95.8593 |

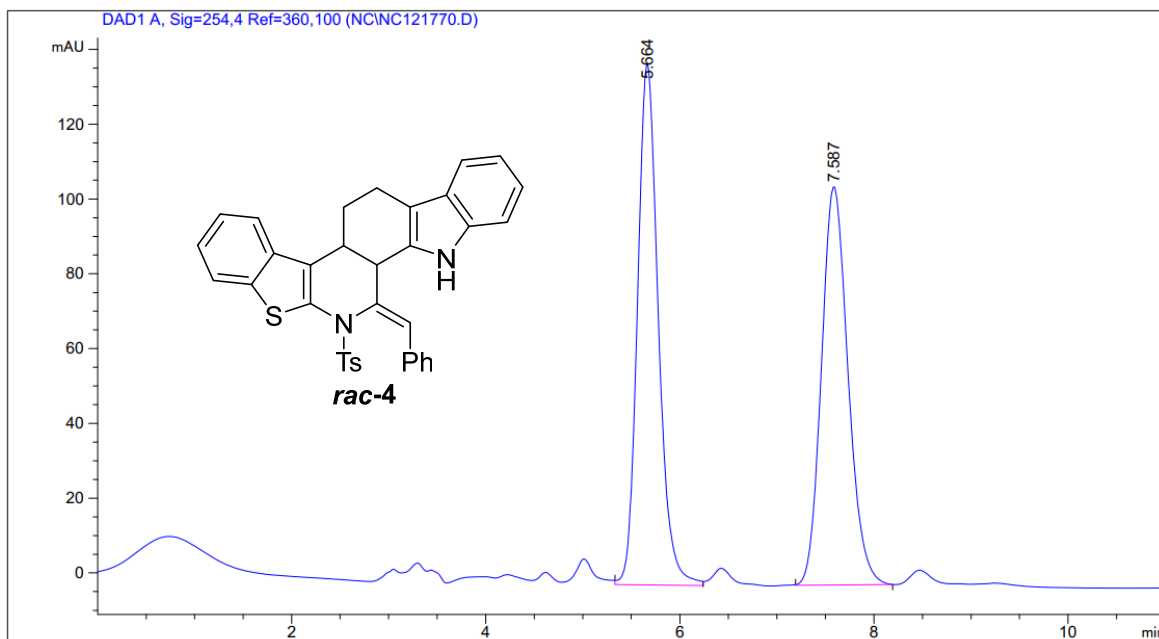

| Peak # | Ret Time [min] | Type | Width [min] | Area [mAU*s] | Height [mAU] | Area % |
|--------|----------------|------|-------------|--------------|--------------|--------|
|--------|----------------|------|-------------|--------------|--------------|--------|

|   |       |    |        |            |           |         |
|---|-------|----|--------|------------|-----------|---------|
| 1 | 5.664 | VB | 0.2281 | 2078.83862 | 139.34492 | 50.6403 |
| 2 | 7.587 | BB | 0.2940 | 2026.27222 | 106.50633 | 49.3597 |

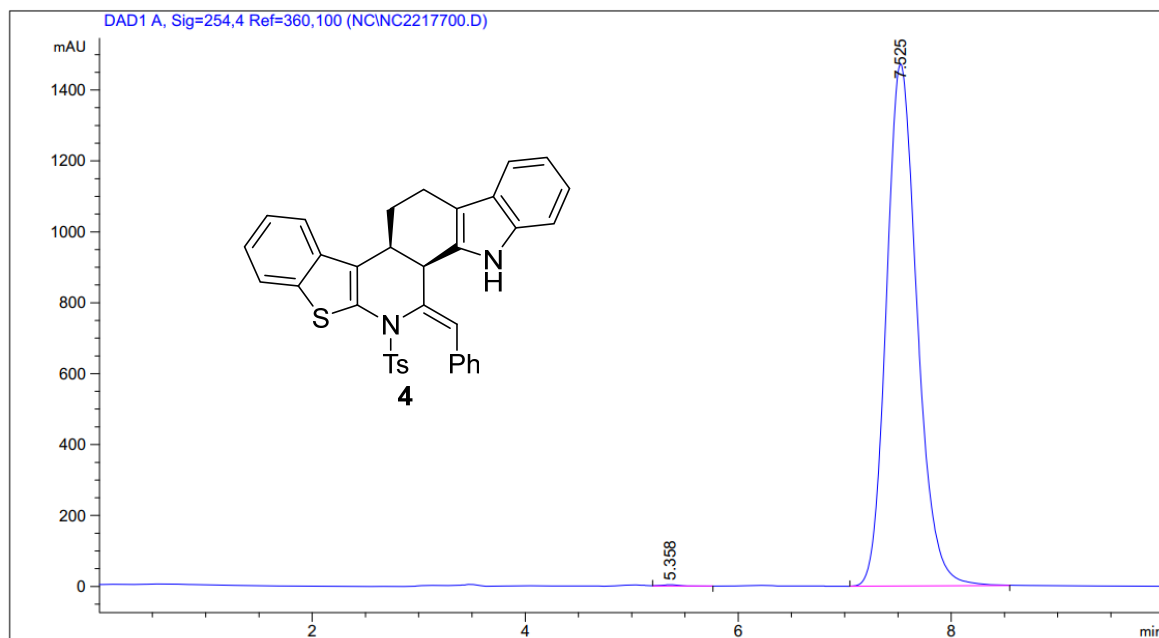

| Peak # | Ret Time [min] | Type | Width [min] | Area [mAU*s] | Height [mAU] | Area % |
|--------|----------------|------|-------------|--------------|--------------|--------|
|--------|----------------|------|-------------|--------------|--------------|--------|

|   |       |    |        |           |            |         |
|---|-------|----|--------|-----------|------------|---------|
| 1 | 5.358 | VB | 0.1864 | 43.41637  | 3.66003    | 0.1465  |
| 2 | 7.525 | BB | 0.3085 | 2.95893e4 | 1472.02563 | 99.8535 |
